# Supplementary material for: Defining neutralization and allostery by antibodies against COVID-19 variants
Source: Research Square preprint supplement (doi:10.21203/rs.3.rs-2465199/v1), 2023-01-23
Supplement: Supplementary file 1 [file 2714743e4f1b243dea98e313.xlsx]

## Sheet: HDX Summary Table
Table S5: Summary of HDXMS experiments and the number of peptides obtained for the Spike and RBD proteins in various conditions are tabulated.
Data Set	Spike(Wuhan)	Spike(W)+LSI-CoV-014	Spike(W)+LSI-CoV-015	Spike(W)+LSI-CoV-016	Spike(W)+LSI-CoV-017	Spike(W)+4A8	Spike(W)+CoVA2-39	Spike(W)+CoVA2-04	Spike(W)+5A6
HDX reaction details	10 mM PBS (pH 7.4), pDread = 7.530, 37 °C
HDX time course (min)	1, 10, 100							1, 10
HDX control samples	Maximally-labeled control (Spike protein)
# of Peptides	267	222	264	264	192	187	247	247	150
Sequence coverage	0.862	0.826	0.86	0.85	0.82	0.82	0.83	0.83	0.81
Average peptide length / Redundancy	13.86 / 3.58	13.86 / 2.58	13.86 / 2.98	13.86 / 2.94	13.65/ 2.02	12.85/2.12	13.86 / 2.75	13.86 / 2.75	13.86 / 2.12
Replicates (biological or technical)	6 (biological and technical)	6 (biological and technical)	6 (biological and technical)	6 (biological and technical)	5 (biological and technical)	3 (technical)	6 (biological and technical)	6 (biological and technical)	5 (biological and technical)
Repeatability (average standard deviation)	0.018	0.019	0.046	0.029	0.201	0.081	0.112	0.067	0.021
Significant differences in HDX (delta HDX > X D)	0.5 D (99% CI)
Data Set	RBD(Wuhan)	RBD(W)+LSI-CoV-014	RBD(W)+LSI-CoV-015	RBD(W)+LSI-CoV-016	RBD(W)+LSI-CoV-017	RBD(W)+CoVA2-04	RBD(W)+CoVA2-39	RBD(W)+CR3022
HDX reaction details	10 mM PBS (pH 7.4), pDread = 7.530, 37 °C
HDX time course (min)	1, 10, 100				1, 10
HDX control samples	Maximally-labeled control (RBD protein)
# of Peptides	68	49	61	66	39	56	56	57
Sequence coverage	0.862	0.826	0.86	0.85	0.82	0.83	0.83	0.82
Average peptide length / Redundancy	13.86 / 3.58	13.86 / 2.58	13.86 / 2.98	13.86 / 2.94	13.86 / 2.32	13.86 / 2.75	13.86 / 2.75	13.86 / 2.28
Replicates (biological or technical)	6 (biological and technical)	6 (biological and technical)	6 (biological and technical)	6 (biological and technical)	3 (technical)	3 (technical)	3 (technical)	3 (technical)
Repeatability (average standard deviation)	0.023	0.042	0.039	0.045	0.121	0.082	0.098	0.103
Significant differences in HDX (delta HDX > X D)	0.5 D (99% CI)
Data Set	RBD(Delta)	RBD(D)+LSI-CoV-014	RBD(D)+LSI-CoV-015	RBD(D)+LSI-CoV-016	RBD(D)+5A6	RBD(D)+CoVA2-04	RBD(D)+ACE2
HDX reaction details	10 mM PBS (pH 7.4), pDread = 7.530, 37 °C
HDX time course (min)	1, 10, 100
HDX control samples	NA
# of Peptides	77	77	77	77	77	77	77
Sequence coverage	0.943	0.943	0.943	0.943	0.943	0.943	0.943
Average peptide length / Redundancy	12.79 / 3.75	12.79 / 3.75	12.79 / 3.75	12.79 / 3.75	12.79 / 3.75	12.79 / 3.75	12.79 / 3.75
Replicates (biological or technical)	6 (biological and technical)	3 (technical)	3 (technical)	3 (technical)	3 (technical)	3 (technical)	3 (technical)
Repeatability (average standard deviation)	0.051	0.059	0.047	0.044	0.049	0.041	0.045
Significant differences in HDX (delta HDX > X D)	0.5 D (99% CI)
Data Set	RBD(O1)	RBD(O1)+LSI-CoV-014	RBD(O1)+LSI-CoV-015	RBD(O1)+LSI-CoV-016	RBD(O1)+ACE2
HDX reaction details	10 mM PBS (pH 7.4), pDread = 7.530, 37 °C
HDX time course (min)	1, 10, 100
HDX control samples	NA
# of Peptides	62	62	62	62	62
Sequence coverage	0.964	0.964	0.964	0.964	0.964
Average peptide length / Redundancy	11.71/2.70	11.71/2.70	11.71/2.70	11.71/2.70	11.71/2.70
Replicates (biological or technical)	6 (biological and technical)	3 (technical)	3 (technical)	3 (technical)	3 (technical)
Repeatability (average standard deviation)	0.083	0.077	0.063	0.074	0.084
Significant differences in HDX (delta HDX > X D)	0.5 D (99% CI)
Data Set	RBD(O2)	RBD(O2)+LSI-CoV-014	RBD(O2)+LSI-CoV-015	RBD(O2)+LSI-CoV-016	RBD(O2)+ACE2
HDX reaction details	10 mM PBS (pH 7.4), pDread = 7.530, 37 °C
HDX time course (min)	1, 10, 100
HDX control samples	NA
# of Peptides	66	66	66	65	66
Sequence coverage	0.9247	0.9247	0.9247	0.878	0.9247
Average peptide length / Redundancy	12.76/3.26	12.76/3.26	12.76/3.26	12.75/3.38	12.77/3.27
Replicates (biological or technical)	6 (biological and technical)	3 (technical)	3 (technical)	3 (technical)	3 (technical)
Repeatability (average standard deviation)	0.048	0.049	0.053	0.043	0.059
Significant differences in HDX (delta HDX > X D)	0.5 D (99% CI)
Data Set	Spike(Delta)	Spike(D)+LSI-CoV-014	Spike(D)+LSI-CoV-015	Spike(D)+LSI-CoV-016	Spike(D)+CoVA2-04	Spike(D)+ACE2	Spike(D)+5A6
HDX reaction details	10 mM PBS (pH 7.4), pDread = 7.530, 37 °C
HDX time course (min)	1, 10, 100
HDX control samples	NA
# of Peptides	177	177	177	171	163	164	172
Sequence coverage	0.792	0.792	0.792	0.792	0.757	0.766	0.7769
Average peptide length / Redundancy	12.40/2.18	12.40/2.18	12.40/2.18	12.39/2.12	12.34/2.10	12.29/2.08	12.33/2.16
Replicates (biological or technical)	6 (biological and technical)	3 (technical)	3 (technical)	3 (technical)	3 (technical)	3 (technical)	3 (technical)
Repeatability (average standard deviation)	0.074	0.062	0.069	0.079	0.063	0.076	0.064
Significant differences in HDX (delta HDX > X D)	0.5 D (99% CI)
Data Set	Spike(O2)	Spike(O2)+LSI-CoV-014	Spike(O2)+LSI-CoV-015	Spike(O2)+LSI-CoV-016	Spike(O2)+ACE2
HDX reaction details	10 mM PBS (pH 7.4), pDread = 7.530, 37 °C
HDX time course (min)	1, 10, 100
HDX control samples	NA
# of Peptides	253	253	252	253	253
Sequence coverage	0.862	0.862	0.853	0.858	0.858
Average peptide length / Redundancy	12.98/3.03	12.98/3.03	12.96/3.03	12.98/3.03	12.98/3.03
Replicates (biological or technical)	6 (biological and technical)	3 (technical)	3 (technical)	3 (technical)	3 (technical)
Repeatability (average standard deviation)	0.097	0.07	0.069	0.056	0.079
Significant differences in HDX (delta HDX > X D)	0.5 D (99% CI)
