# Supplementary material for: Defining neutralization and allostery by antibodies against COVID-19 variants
Source: Research Square preprint supplement (doi:10.21203/rs.3.rs-2465199/v1), 2023-01-23
Supplement: Supplementary file 2 [file 5d72b08d70192bec875668cd.xlsx]

## Sheet: Spike-Wuhan
Table: Deuterium exchange values for wild-type Wuhan strain of Spike (SpikeW) in the presence and absence of different antibodies is tabulated. The data is sorted into three groups based on the epitope site recognized by the antibody.
											Group 1: Antibodies binding at the cryptic site of RBD of Spike (LSI-CoVA-014, LSI-CoVA-015, LSI-CoVA-016)																								Group 2: NTD-binding Antibodies (LSI-CoVA-017 and 4A8)
				Relative Uptake of peptides of Spike(W) in apo state							Spike(W):LSI-CoVA-014 complex minus Spike(W)							Spike(W):LSI-CoVA-015 complex minus Spike(W)							Spike(W):LSI-CoVA-016 complex minus Spike(W)										Spike(W):LSI-CoVA-017 complex minus Spike(W)							Spike(W):4A8 complex minus Spike(W)
				1 min		10 min		100 min			1 min		10 min		100 min			1 min		10 min		100 min			1 min		10 min		100 min						1 min		10 min		100 min			1 min		10 min		100 min
S.No.	Residue No.s	Sequence	MEA	Uptake (Da)	± SD	Uptake (Da)	± SD	Uptake (Da)	± SD		ΔHDX (D)	± SD	ΔHDX (D)	± SD	ΔHDX (D)	± SD		ΔHDX (D)	± SD	ΔHDX (D)	± SD	ΔHDX (D)	± SD		ΔHDX (D)	± SD	ΔHDX (D)	± SD	ΔHDX (D)	± SD		S.No.	Residue No.s	Sequence	ΔHDX (D)	± SD	ΔHDX (D)	± SD	ΔHDX (D)	± SD		ΔHDX (D)	± SD	ΔHDX (D)	± SD	ΔHDX (D)	± SD		S.No.
1	21-31	RTQLPPAYTNS	8	1.15026	0.089602	1.82269	0.090704	2.72458	0.077153		0.471564	0.093985	0.084843	0.094682	-0.461682	0.097907		0.038273	0.096044	-0.076238	0.131302	-0.046495	0.09966		0.247291	0.116557	-0.12418	0.091301	-0.096494	0.196861		1	21-31	RTQLPPAYTNS	0.064175	0.287367	-0.129979	0.310235	-0.571608	0.427999		n.a.	n.a.	0.161588	0.320155	-0.301322	0.360823		1
2	32-42	FTRGVYYPDKV	9	1.28858	0.061679	1.7743	0.084155	2.21855	0.077963		0.157075	0.078345	0.099718	0.085048	-0.007777	0.095505		-0.021286	0.100648	-0.040987	0.091277	0.301542	0.089124		0.109245	0.064271	-0.167358	0.085109	0.11359	0.087477		2	32-42	FTRGVYYPDKV	-0.162905	0.066682	0.351245	0.086143	0.553647	0.080104		0.221739	0.075217	0.464684	0.089923	1.02712	0.080497		2
3	32-48	FTRGVYYPDKVFRSSVL	15	3.70499	0.132965	4.1804	0.20076	4.74395	0.153712		0.49394	0.176655	0.175104	0.202846	0.073518	0.156486		-0.145923	0.167004	-0.240209	0.201679	0.435075	0.187612		0.153479	0.168802	-0.490262	0.202887	0.212977	0.169416		3	32-48	FTRGVYYPDKVFRSSVL	-0.626033	0.258067	0.238169	0.265404	0.526751	0.284329		0.470328	0.245181	0.53407	0.273666	1.05561	0.182207		3
4	33-42	TRGVYYPDKV	8	1.24295	0.019374	1.72762	0.0569	2.09398	0.10214		n.a.	n.a.	n.a.	n.a.	n.a.	n.a.		0.070941	0.046807	0.230481	0.070732	0.309105	0.121176		0.188095	0.09049	0.338377	0.05858	0.020016	0.153617		4	33-42	TRGVYYPDKV	-0.506609	0.044756	-0.483005	0.056933	-0.463443	0.102159		0.179897	0.023927	0.161051	0.058606	0.136466	0.103101		4
5	36-48	VYYPDKVFRSSVL	11	3.59874	0.15189	3.70864	0.149711	3.97352	0.167135		0.243989	0.174613	0.17931	0.190479	-0.087959	0.18554		0.097198	0.198956	0.101621	0.157913	0.361333	0.170376		0.31425	0.160765	-0.019398	0.254732	0.238709	0.187935		5	36-48	VYYPDKVFRSSVL	-0.800118	0.163425	-0.078274	0.180164	-0.03289	0.167634		-1.81473	0.182105	-0.58569	0.162429	-1.05828	0.410346		5
6	49-55	HSTQDLF	6	0.514349	0.011281	0.836162	0.053542	1.15508	0.058836		0.109365	0.096803	0.066781	0.054287	0.145457	0.07671		0.08449	0.059174	-0.015841	0.06008	0.250606	0.126976		0.070904	0.025006	0.096207	0.069398	0.11154	0.063448		6	49-55	HSTQDLF	-0.086743	0.036929	0.244709	0.070244	0.437174	0.084011		0.019119	0.029058	0.135515	0.057754	0.215943	0.061711		6
7	60-83	SNVTWFHAIHVSGTNGTKRFDNPV	22	4.33179	0.126454	4.13905	0.136901	5.23624	0.20859		0.0772	0.126482	n.a.	n.a.	n.a.	n.a.		-2.94229	0.161998	-1.95127	0.196714	-0.068419	0.222549		-3.17367	0.183703	-2.93648	0.140369	n.a.	n.a.		7	60-83	SNVTWFHAIHVSGTNGTKRFDNPV	1.11368	0.15367	2.13535	0.161799	0.044513	0.225714		2.73138	0.132787	4.41715	0.142771	6.52655	0.212489		7
8	85-91	PFNDGVY	5	0.305512	0.020106	0.626929	0.010803	0.837601	0.083407		n.a.	n.a.	n.a.	n.a.	n.a.	n.a.		0.040742	0.032944	0.05434	0.017935	0.213878	0.085862		0.038177	0.036864	-0.05458	0.048489	0.133944	0.088373		8	85-91	PFNDGVY	0.332132	0.026161	0.096499	0.013129	0.125579	0.08374		-0.07339	0.028099	-0.078622	0.083907	-0.276132	0.085685		8
9	92-103	FASTEKSNIIRG	11	1.68301	0.092728	2.1737	0.118237	3.02412	0.155775		n.a.	n.a.	n.a.	n.a.	n.a.	n.a.		0.03927	0.099066	0.199207	0.118682	0.411578	0.358697		0.108298	0.093644	0.047791	0.25357	0.26782	0.31567		9	92-103	FASTEKSNIIRG	-0.103199	0.092861	0.081539	0.118342	-0.703064	0.155855		-0.334128	0.103521	-0.025817	0.131983	-0.690485	0.167994		9
10	92-106	FASTEKSNIIRGWIF	14	1.39313	0.074352	1.87329	0.06645	2.67569	0.120481		0.242432	0.132898	0.173033	0.083889	0.098221	0.127117		-0.013625	0.082888	0.130007	0.074072	0.34281	0.132194		-0.011482	0.102255	0.016189	0.167713	0.223012	0.130878		10	92-106	FASTEKSNIIRGWIF	-0.448859	0.109589	-0.272947	0.101212	-0.838661	0.212079		0.268351	0.096215	0.109696	0.07253	-0.623478	0.126282		10
11	92-110	FASTEKSNIIRGWIFGTTL	18	2.21748	0.138259	3.87097	0.09516	5.04075	0.120777		0.619094	0.164393	0.349125	0.096553	-0.15738	0.160863		0.133792	0.139479	0.331164	0.169224	0.481216	0.12133		0.043695	0.265931	-0.499942	0.114306	0.302661	0.127921		11	92-110	FASTEKSNIIRGWIFGTTL	-0.556854	0.199125	-1.00597	0.095333	-1.84467	0.367884		0.073749	0.1468	-1.02922	0.166059	-2.04093	0.273503		11
12	93-103	ASTEKSNIIRG	10	1.91161	0.106628	2.44753	0.107018	3.1235	0.220908		n.a.	n.a.	n.a.	n.a.	n.a.	n.a.		0.096813	0.118789	0.162483	0.113408	0.498752	0.230365		0.231347	0.182373	-0.104403	0.12668	0.274123	0.232392		12	93-103	ASTEKSNIIRG	-0.656985	0.109304	-0.306134	0.109684	-0.905045	0.226153		0.503432	0.108999	0.229579	0.109765	-0.280148	0.225529		12
13	94-103	STEKSNIIRG	9	1.54173	0.07438	1.96175	0.093171	2.7169	0.084142		0.445748	0.117508	0.298536	0.099068	0.351639	0.08579		0.015711	0.085055	0.164697	0.095231	0.389957	0.101143		0.090104	0.083459	-0.050234	0.169438	0.234398	0.088231		13	94-103	STEKSNIIRG	-0.204211	0.0749	-0.246034	0.093586	-0.623456	0.084602		-0.614551	0.114211	-0.01281	0.13227	-0.612616	0.154548		13
14	104-110	WIFGTTL	6	0.553492	0.056205	1.50442	0.026974	1.61493	0.048149		0.295121	0.090119	0.034953	0.034797	-0.01761	0.048593		0.161714	0.105071	0.14622	0.027644	0.171689	0.048275		0.286875	0.059342	0.150209	0.061664	0.141492	0.054309		14	104-110	WIFGTTL	0.097231	0.084891	-0.075588	0.202469	-0.161323	0.048233		0.230814	0.057793	-0.109091	0.042862	0.135156	0.076178		14
15	107-117	GTTLDSKTQSL	10	1.1554	0.033681	1.88698	0.260613	2.54425	0.116271		0.795266	0.076153	0.486559	0.265247	-0.004528	0.121513		0.153357	0.087825	0.239246	0.264835	0.664241	0.141033		0.160664	0.037747	n.a.	n.a.	0.495089	0.273111		15	107-117	GTTLDSKTQSL	1.36669	0.051119	0.841748	0.263109	0.292258	0.121763		n.a.	n.a.	-0.240149	0.484801	-0.634475	0.226013		15
16	111-117	DSKTQSL	6	0.608389	0.029898	0.743112	0.029224	1.17254	0.066087		0.079362	0.056542	0.097357	0.039279	0.062368	0.071171		0.026606	0.046636	0.067192	0.078413	0.094059	0.06968		-0.024078	0.055104	0.054449	0.04716	0.003243	0.080667		16	111-118	DSKTQSLL	-0.207356	0.054063	0.128579	0.074995	-0.379403	0.090705		n.a.	n.a.	-0.05996	0.077271	0.266551	0.092596		16
17	111-118	DSKTQSLL	7	0.581618	0.039487	0.605484	0.065274	0.885315	0.082848		n.a.	n.a.	n.a.	n.a.	n.a.	n.a.		0.00355	0.123809	-0.01298	0.081756	0.173011	0.20568		-0.085938	0.058732	-0.178035	0.089744	-0.167801	0.097736		17	136-143	CNDPFLGV	-1.31109	0.078488	-0.118848	0.130744	-0.18378	0.151023		-1.03953	0.101597	0.184163	0.128358	0.239499	0.130783		17
18	136-143	CNDPFLGV	6	1.90078	0.064024	1.77426	0.126055	1.91783	0.096568		-0.096179	0.116355	0.144195	0.196924	0.379362	0.122449		0.076895	0.193842	0.26801	0.148072	0.021066	0.143413		0.153122	0.151575	0.331279	0.127912	0.163706	0.105109		18	166-182	CTFEYVSQPFLMDLEGK	-1.4754	0.271095	-0.879214	0.129954	-0.074391	0.138798		-1.25983	0.263017	-0.579907	0.131321	0.124464	0.140078		18
19	166-182	CTFEYVSQPFLMDLEGK	15	3.78358	0.254467	7.56017	0.126674	8.61615	0.135731		0.492473	0.25458	-1.95009	0.126901	n.a.	n.a.		2.54015	0.255629	0.629384	0.161525	0.212449	0.204375		2.21494	0.279411	-0.422738	0.168581	-0.060197	0.136425		19	170-176	YVSQPFL	-0.529841	0.118666	-0.152542	0.12041	0.062302	0.117587		-0.045683	0.098187	0.05831	0.096771	-0.023672	0.128593		19
20	168-182	FEYVSQPFLMDLEGK	13	3.39736	0.130275	4.92995	0.08698	4.66202	0.069169		-1.0705	0.130275	n.a.	n.a.	n.a.	n.a.		0.947027	0.218574	0.253506	0.110091	1.17333	0.332927		0.440561	0.132073	-0.215743	0.276478	0.912743	0.130371		20	177-186	MDLEGKQGNF	-0.301923	0.169273	0.192692	0.228339	0.312754	0.17182		0.192184	0.257398	0.412883	0.277815	0.137018	0.17119		20
21	170-176	YVSQPFL	5	2.01462	0.091905	1.95483	0.093434	2.02185	0.143953		-0.113096	0.147031	-0.100652	0.095101	0.08499	0.166379		0.138515	0.153456	0.205366	0.113267	0.114022	0.188917		-0.07111	0.112811	0.052953	0.204758	-0.088154	0.216225		21	177-191	MDLEGKQGNFKNLRE	-0.385009	0.538317	0.197747	0.279699	-0.229294	0.503956		0.376865	0.278461	0.392966	0.296081	0.187509	0.337979		21
22	177-186	MDLEGKQGNF	9	2.30776	0.14979	1.99026	0.210902	2.14118	0.158143		n.a.	n.a.	n.a.	n.a.	n.a.	n.a.		-0.067614	0.218357	0.332886	0.224273	0.182766	0.218003		0.015371	0.176664	-0.010909	0.272558	0.20003	0.218857		22	178-191	DLEGKQGNFKNLRE	0.191045	0.369246	-0.288959	0.590995	-0.053463	0.384445		0.424162	0.367195	0.234715	0.566477	-0.131507	0.382476		22
23	177-191	MDLEGKQGNFKNLRE	14	3.12584	0.231848	3.65763	0.26511	3.85552	0.302853		0.599202	0.309792	0.573311	0.280708	0.676721	0.308172		0.258615	0.232458	0.376646	0.267833	0.492963	0.329101		0.326489	0.239916	0.015512	0.509157	0.336967	0.327842		23	181-191	GKQGNFKNLRE	0.085838	0.050414	0.032551	0.161803	-0.112669	0.132798		0.714093	0.053686	0.152464	0.224341	0.536311	0.208736		23
24	178-191	DLEGKQGNFKNLRE	13	3.0078	0.24965	3.37846	0.320347	3.86012	0.271626		n.a.	n.a.	n.a.	n.a.	n.a.	n.a.		0.095908	0.314284	0.409091	0.371665	0.234957	0.351938		0.175628	0.325711	-0.303006	0.37954	0.026444	0.345065		24	192-199	FVFKNIDG	-0.322563	0.152795	-0.083218	0.096788	-0.316468	0.11997		0.036589	0.148343	-0.027916	0.093458	-0.227653	0.079352		24
25	180-190	EGKQGNFKNLR	10	1.9379	0.141762	2.82848	0.034619	3.08902	0.12609		n.a.	n.a.	n.a.	n.a.	n.a.	n.a.		0.126221	0.14177	0.037922	0.153491	0.128986	0.15872		0.292084	0.161591	-0.551229	0.036863	-0.154188	0.135152		25	192-200	FVFKNIDGY	-0.229062	0.181448	-0.001493	0.186499	-0.19531	0.210948		0.165117	0.13198	0.165349	0.094846	0.039682	0.111403		25
26	180-191	EGKQGNFKNLRE	11	2.06711	0.148442	2.54151	0.214231	2.82281	0.230532		0.323253	0.245174	-0.19002	0.226999	0.428955	0.237645		0.093294	0.18534	0.425895	0.235261	0.283325	0.273962		0.351591	0.241649	0.070726	0.408933	0.245112	0.244213		26	192-201	FVFKNIDGYF	-0.344257	0.091218	-0.306239	0.080102	-0.442351	0.126385		0.061647	0.095529	-0.062625	0.046674	-0.215445	0.092616		26
27	181-191	GKQGNFKNLRE	10	2.13798	0.044192	3.00993	0.159974	3.50835	0.086962		0.865965	0.324963	0.666065	0.160002	n.a.	n.a.		-0.093825	0.251289	0.560284	0.205087	0.074155	0.179346		0.827329	0.162096	-0.049439	0.160426	0.1943	0.107293		27	193-201	VFKNIDGYF	0.365094	0.089402	0.007741	0.127196	-0.23769	0.182209		0.228363	0.118432	0.298444	0.123629	-0.267018	0.153312		27
28	184-191	GNFKNLRE	7	1.44055	0.112678	1.89677	0.101852	2.08323	0.115564		0.221088	0.140351	0.55541	0.102168	0.206125	0.235207		0.118979	0.160385	0.207811	0.107546	0.24923	0.122139		0.137292	0.117329	-0.356957	0.101852	0.021657	0.13883		28	194-200	FKNIDGY	-0.029672	0.10165	n.a.	n.a.	0.182828	0.044589		0.274846	0.101988	0.099978	0.058492	0.243711	0.100629		28
29	192-199	FVFKNIDG	7	1.36003	0.140594	1.47083	0.092527	1.66009	0.07567		0.493118	0.211495	0.5296	0.125155	0.331933	0.199291		0.24465	0.148418	0.179518	0.105671	0.105687	0.100078		0.17568	0.14374	0.109015	0.172838	0.072979	0.082777		29	194-201	FKNIDGYF	-0.224436	0.083667	-0.15256	0.094774	-0.210028	0.151579		0.183065	0.080954	0.022598	0.057675	-0.092478	0.090132		29
30	192-200	FVFKNIDGY	8	1.23013	0.115023	1.77785	0.087583	2.11596	0.108249		0.24752	0.134945	0.199338	0.099911	0.219929	0.16747		0.227635	0.117147	0.221899	0.087857	0.161986	0.110041		0.264215	0.12549	0.053747	0.090734	0.141187	0.116011		30	195-201	KNIDGYF	-0.112619	0.043306	-0.110037	0.068345	-0.22399	0.07921		0.328204	0.046627	0.173534	0.056721	-0.055601	0.052544		30
31	192-201	FVFKNIDGYF	9	1.63383	0.077929	2.27669	0.044487	2.61683	0.087123		0.309211	0.141132	0.088741	0.059997	0.17785	0.101028		0.09419	0.078917	0.128985	0.047799	0.215783	0.088282		0.151899	0.083544	-0.068425	0.047031	0.125351	0.089067		31	200-212	YFKIYSKHTPINL	-0.342448	0.142459	-0.099571	0.1102	-0.095804	0.152572		0.178022	0.120206	0.199717	0.112535	0.10555	0.138881		31
32	193-201	VFKNIDGYF	8	1.45476	0.043766	1.86071	0.086011	2.46971	0.118943		0.374658	0.158283	0.34155	0.116698	-0.040501	0.180381		0.231209	0.049449	0.450449	0.102521	0.168821	0.18707		0.337479	0.085594	0.588014	0.103797	0.18021	0.13825		32	201-212	FKIYSKHTPINL	-0.498158	0.141072	-0.335311	0.107943	-0.42779	0.180581		-0.113157	0.136627	-0.202507	0.238901	-0.184253	0.113306		32
33	194-200	FKNIDGY	6	1.13471	0.101647	1.46199	0.057243	1.6678	0.031884		0.303616	0.141691	n.a.	n.a.	0.449322	0.051612		0.135342	0.106284	0.226361	0.087045	0.475844	0.045528		0.090713	0.112364	0.175067	0.190134	0.537687	0.037826		33	213-220	VRDLPQGF	-0.447636	0.129951	-0.095258	0.126339	-0.100985	0.098976		-0.07193	0.119447	-0.052005	0.117544	-0.22999	0.172475		33
34	194-201	FKNIDGYF	7	1.35661	0.055645	1.89264	0.045943	2.20498	0.081707		0.258748	0.10778	0.114168	0.061631	0.148175	0.08652		0.17363	0.059185	0.185721	0.053448	0.164463	0.085295		0.170506	0.075901	-0.043438	0.047324	0.120334	0.084746		34	213-223	VRDLPQGFSAL	-0.703681	0.260789	-0.101856	0.271511	0.144022	0.284569		-0.064263	0.205762	0.136623	0.215145	0.451278	0.233085		34
35	195-201	KNIDGYF	6	1.06159	0.043002	1.71015	0.033578	1.94481	0.049355		n.a.	n.a.	n.a.	n.a.	n.a.	n.a.		0.139632	0.043914	0.106749	0.036674	0.240421	0.057388		0.194272	0.056093	-0.000929	0.097894	0.201517	0.071855		35	213-228	VRDLPQGFSALEPLVD	1.5059	0.083486	1.28956	0.19046	1.1003	0.347		0.713731	0.083704	1.11347	0.190556	1.06899	0.359991		35
36	200-212	YFKIYSKHTPINL	11	1.47695	0.096595	1.44641	0.09976	1.61978	0.124251		0.143698	0.148582	0.079459	0.104364	0.207199	0.128016		0.024839	0.119661	0.149582	0.111882	0.213632	0.137674		0.070866	0.110732	-0.021608	0.153141	0.180027	0.141438		36	221-228	SALEPLVD	0.128401	0.044668	-0.088679	0.101804	-0.151295	0.050038		n.a.	n.a.	0.147327	0.058014	n.a.	n.a.		36
37	201-212	FKIYSKHTPINL	10	1.48164	0.079288	1.46777	0.092612	1.61345	0.100285		n.a.	n.a.	n.a.	n.a.	n.a.	n.a.		0.03325	0.085601	0.162196	0.093302	0.211033	0.109517		0.079078	0.083043	-0.005081	0.151819	0.124362	0.102508		37	221-229	SALEPLVDL	-0.05263	0.022192	0.178758	0.108511	0.472587	0.122667		0.074899	0.039993	0.367917	0.065922	0.479976	0.074575		37
38	213-220	VRDLPQGF	6	1.98218	0.056936	1.8206	0.084171	1.8995	0.095808		-0.004609	0.119855	0.014899	0.104311	0.066375	0.112235		-0.043372	0.117203	0.147247	0.091443	0.14243	0.117197		-0.028265	0.076101	-0.13671	0.08874	0.07191	0.10366		38	243-255	ALHRSYLTPGDSS	-0.531182	0.356118	-0.576034	0.168757	-0.986787	0.217129		-0.272799	0.263987	-0.439245	0.256331	-0.698393	0.269772		38
39	213-223	VRDLPQGFSAL	9	2.58252	0.082108	2.49269	0.124922	2.70002	0.171751		0.073101	0.171241	0.048246	0.138012	0.206077	0.176323		-0.049623	0.11261	0.130263	0.127742	0.225465	0.194478		0.085164	0.089113	-0.208518	0.126136	0.144531	0.187051		39	245-265	HRSYLTPGDSSSGWTAGAAAY	-1.43599	0.291094	-0.770424	0.520551	-0.300972	0.324484		-0.192611	0.177147	0.579733	0.260309	0.120601	0.342127		39
40	213-228	VRDLPQGFSALEPLVD	13	2.48001	0.062507	3.50721	0.182242	4.52918	0.125664		2.12575	0.159713	1.49352	0.185902	0.844454	0.13207		0.183599	0.079997	0.404686	0.189413	0.42516	0.142547		0.697732	0.074647	-0.296387	0.184043	0.476547	0.13846		40	265-271	YYVGYLQ	0.107886	0.020689	0.158012	0.114075	0.236403	0.037242		0.128682	0.020266	0.296705	0.086109	0.597044	0.046725		40
41	221-228	SALEPLVD	6	0.272204	0.044081	1.23067	0.057696	2.13398	0.049514		0.153628	0.078566	0.111604	0.073258	-0.200069	0.060221		0.107212	0.055743	0.09036	0.109845	0.190509	0.05037		0.094508	0.084319	0.129549	0.083006	0.042886	0.056227		41	266-276	YVGYLQPRTFL	0.160044	0.078292	0.604776	0.121769	1.04241	0.0948		0.539896	0.103437	0.671206	0.145817	1.42888	0.081553		41
42	221-229	SALEPLVDL	7	0.263351	0.015346	1.4396	0.0536	2.6413	0.047851		0.09559	0.11093	0.055056	0.068491	0.105491	0.065287		0.052203	0.059316	0.116463	0.056288	0.25286	0.053998		0.082907	0.019591	0.076308	0.122429	0.117923	0.049099		42	267-276	VGYLQPRTFL	-0.139991	0.128643	0.265529	0.12588	1.4917	0.185645		0.230048	0.06001	0.271143	0.068145	1.46079	0.17182		42
43	242-264	LALHRSYLTPGDSSSGWTAGAAA	21	7.01508	0.150318	6.91714	0.145241	7.14947	0.212974		0.386073	0.151693	0.272042	0.146663	0.607367	0.234736		0.098129	0.151693	0.397989	0.176765	0.606441	0.229792		-0.194273	0.197725	-0.613168	0.145256	0.482029	0.212984		43	289-303	CALDPLSETKCTL	-0.77431	0.203472	-0.440867	0.392803	-0.126724	0.249582		-0.609657	0.216395	-0.248969	0.289689	0.00664	0.275583		43
44	243-255	ALHRSYLTPGDSS	11	0.837482	0.155831	1.01668	0.16247	1.60161	0.173864		-0.091969	0.251133	-0.10173	0.237886	0.136427	0.230151		0.078068	0.222483	0.112889	0.225756	0.465247	0.236322		-0.039261	0.169202	-0.124425	0.230983	0.138319	0.186031		44	295-303	PLSETKCTL	-0.608903	0.12625	-0.35119	0.169488	-0.525204	0.127757		-0.333109	0.122389	-0.372606	0.084808	-0.147438	0.123944		44
45	243-257	ALHRSYLTPGDSSSG	13	2.45571	0.140969	2.19851	0.15956	2.22839	0.152534		1.76907	0.216731	2.41477	0.16078	2.43614	0.1706		-0.045535	0.206744	0.230361	0.175817	0.578112	0.210236		-0.028827	0.147552	-0.292111	0.335386	0.536556	0.185154		45	304-313	KSFTVEKGIY	0.387435	0.18079	0.465901	0.201542	0.514771	0.194085		0.885159	0.180923	0.788097	0.203862	0.536376	0.18978		45
46	245-257	HRSYLTPGDSSSG	11	2.33783	0.057403	1.95476	0.151512	2.07072	0.116922		n.a.	n.a.	n.a.	n.a.	n.a.	n.a.		0.0066	0.195278	0.300274	0.160544	0.390548	0.199148		-0.416541	0.066527	-0.138984	0.155199	0.2245	0.1344		46	304-317	KSFTVEKGIYQTSN	-0.987775	0.412293	-0.369087	0.262431	-0.434589	0.384541		-0.844299	0.167991	-0.193048	0.265406	-0.406964	0.283722		46
47	245-265	HRSYLTPGDSSSGWTAGAAAY	19	6.10492	0.085432	5.61029	0.234924	6.17054	0.298394		0.263146	0.161377	n.a.	n.a.	0.260224	0.386857		-0.104895	0.160898	0.526392	0.245394	0.464364	0.327314		-0.032988	0.114164	-0.169505	0.23561	0.384109	0.32623		47	304-318	KSFTVEKGIYQTSNF	0.772202	0.191226	0.297978	0.577402	0.659632	0.225911		-0.557928	0.187041	0.308181	0.258026	-0.099187	0.274937		47
48	265-271	YYVGYLQ	6	0.441892	0.017456	0.711221	0.085491	1.05025	0.035548		0.202908	0.082719	n.a.	n.a.	n.a.	n.a.		0.130157	0.097561	0.164599	0.086811	0.161827	0.051905		0.176349	0.019398	0.018201	0.085493	0.046557	0.116785		48	306-313	FTVEKGIY	-0.85339	0.114227	-0.221893	0.076608	-0.206922	0.058364		-0.327256	0.112217	-0.105501	0.084558	-0.264154	0.061017		48
49	265-276	YYVGYLQPRTFL	10	0.671801	0.038922	1.38342	0.065232	2.17575	0.151288		0.237806	0.112921	-0.211236	0.110243	0.246425	0.286513		0.359141	0.159315	0.075716	0.083691	0.47481	0.154265		0.403788	0.053713	0.04457	0.066209	0.091091	0.152014		49	306-317	FTVEKGIYQTSN	-1.46576	0.239275	-0.595841	0.151731	-0.624295	0.151096		-0.829694	0.203854	-0.127551	0.152242	-0.361036	0.12731		49
50	266-276	YVGYLQPRTFL	9	0.646272	0.044157	1.19479	0.042423	1.78926	0.074229		0.236816	0.07874	-0.055286	0.101708	0.246459	0.088886		0.279743	0.134803	0.051393	0.058328	0.351196	0.104758		0.303371	0.048379	-0.078674	0.131066	0.067423	0.076678		50	306-318	FTVEKGIYQTSNF	-1.78902	0.270379	-0.589924	0.188237	-0.611667	0.215383		-1.08054	0.18382	-0.152855	0.18681	-0.259223	0.183706		50
51	267-276	VGYLQPRTFL	8	0.713367	0.024506	1.17562	0.024313	1.64176	0.02562		0.217619	0.10461	-0.175134	0.054233	0.164368	0.113089		0.249921	0.106884	0.045735	0.03697	0.245373	0.033115		0.298547	0.060837	-0.380596	0.055454	0.110411	0.053506		51	310-318	KGIYQTSNF	-0.316989	0.124863	-0.396091	0.13654	-0.322742	0.154656		-0.500164	0.139468	-0.435056	0.22421	-0.300255	0.119093		51
52	289-303	VDCALDPLSETKCTL	13	2.54077	0.012681	4.87236	0.114159	5.37913	0.01138		0.663385	0.267805	0.298865	0.119966	-0.482044	0.207373		1.71229	0.087027	0.083767	0.15625	0.204678	0.278797		1.83095	0.111728	0.502773	0.24887	-0.265927	0.147717		52	318-325	FRVQPTES	-0.083015	0.130562	-0.049439	0.081079	-0.019086	0.10639		0.248487	0.092332	0.336253	0.152606	0.293556	0.10689		52
53	291-299	CALDPLSET	7	1.5289	0.05972	2.41329	0.121574	2.61763	0.144963		n.a.	n.a.	n.a.	n.a.	n.a.	n.a.		0.340725	0.145656	-0.048385	0.136288	0.066704	0.179496		0.191899	0.094557	-0.368949	0.1221	-0.039544	0.148831		53	324-334	ESIVRFPNITNLC	6.3747	4.2509	1.06863	5.47224	-0.296405	6.62911		3.49241	3.80627	-1.87912	5.54641	-0.665828	6.77452		53
54	291-303	CALDPLSETKCTL	11	2.07221	0.109064	3.41072	0.235596	3.64663	0.18449		0.61805	0.16146	0.342438	0.241998	0.187019	0.198722		0.739598	0.178833	0.187103	0.241396	0.397527	0.211055		0.774429	0.137946	0.122285	0.424159	0.250273	0.20197		54	340-359	EVFNATRFASVYAWNRKRIS	-0.546034	0.078545	-0.494969	0.30129	-2.14274	0.410551		-0.42227	0.077506	n.a.	n.a.	n.a.	n.a.		54
55	295-303	PLSETKCTL	7	1.5317	0.110688	2.1274	0.066821	2.47877	0.112404		0.297421	0.111	0.14597	0.067337	-1.17485	0.125432		0.524782	0.17176	0.442607	0.127858	0.537931	0.11715		0.303709	0.116236	-0.26816	0.126727	0.416192	0.117916		55	348-361	ASVYAWNRKRISNC	-0.801835	0.160391	-0.364245	0.297562	-2.43529	0.331528		-0.200618	0.198868	0.044531	0.30905	-1.4417	0.308857		55
56	304-313	KSFTVEKGIY	9	2.95363	0.17036	3.31982	0.198183	3.57226	0.181418		1.08402	0.248771	0.939738	0.201202	0.765203	0.210366		0.178785	0.267772	0.098482	0.208199	0.342091	0.20013		-0.132304	0.358165	0.025909	0.201562	0.224531	0.202632		56	351-361	YAWNRKRISNC	-0.734869	0.213626	-0.681635	0.234304	-1.07236	0.228487		-0.597369	0.162228	-0.499417	0.227358	-0.780923	0.230319		56
57	304-317	KSFTVEKGIYQTSN	13	4.70207	0.162181	5.33638	0.256933	5.67548	0.26314		0.892547	0.190121	1.14487	0.296526	0.836606	0.268662		0.26871	0.165128	0.294637	0.278921	0.590819	0.277191		1.02574	0.1855	0.67777	0.508274	0.683279	0.268102		57	356-375	KRISNCVADYSVLYNSASFS	-1.13261	0.181324	-0.873435	0.283575	-1.0499	0.264606		-0.458423	0.541161	-0.34681	0.295135	-0.548262	0.268962		57
58	304-318	KSFTVEKGIYQTSNF	14	5.02385	0.18265	5.74051	0.23503	6.14563	0.224065		0.793441	0.375872	0.400401	0.246705	0.029915	0.23119		0.467548	0.183162	0.144152	0.263406	0.388055	0.323729		0.548797	0.222498	-0.332679	0.235031	0.189205	0.272906		58	375-387	STFKCYGVSPTKL	-1.22246	0.315488	-0.525503	0.304303	-1.00077	0.055887		-0.254646	0.111802	-0.067372	0.214316	-0.032418	0.059855		58
59	306-313	FTVEKGIY	7	2.41555	0.110682	2.91483	0.076442	3.0959	0.058147		0.320412	0.132781	0.041232	0.084327	0.008123	0.08053		0.385247	0.12317	0.178638	0.07684	0.22134	0.059745		0.458225	0.131372	-0.073197	0.08946	0.101814	0.076705		59	378-387	KCYGVSPTKL	-1.12951	0.059355	-0.21079	0.163809	-0.293785	0.270112		-0.345593	0.0575	-0.010698	0.182408	-0.023368	0.268535		59
60	306-317	FTVEKGIYQTSN	11	4.07034	0.158194	4.77698	0.126631	5.13181	0.085428		0.614154	0.165667	0.204866	0.212001	-0.076243	0.098181		0.512046	0.195979	0.187407	0.154702	0.381421	0.113172		0.754767	0.172836	-0.209598	0.127122	0.119298	0.111116		60	380-386	YGVSPTK	-0.272341	0.122704	-0.388442	0.055381	-0.581363	0.058812		-0.337982	0.055432	-0.316766	0.058631	-0.449038	0.063457		60
61	306-318	FTVEKGIYQTSNF	12	4.27124	0.171901	5.08412	0.175657	5.34664	0.181518		0.42991	0.209358	0.017297	0.182616	-0.156761	0.18918		0.474309	0.184574	0.13172	0.177318	0.424011	0.19964		0.780934	0.192076	-0.083038	0.248903	0.272954	0.186956		61	386-407	KLNDLCFTNVYADSFVIRGDEV	-0.258684	0.352411	-1.41586	0.285102	-1.01019	0.406273		0.348276	0.284815	-0.963492	0.279751	-0.620093	0.327943		61
62	310-318	KGIYQTSNF	8	2.2524	0.124818	2.81967	0.131965	2.83088	0.115908		0.745327	0.175749	0.867805	0.135807	0.901605	0.11833		0.336601	0.130148	0.014985	0.134193	0.477062	0.129808		0.343867	0.138689	-0.036558	0.150729	0.390684	0.128708		62	393-400	TNVYADSF	-0.011381	0.018113	-0.167676	0.057407	-0.220957	0.106358		0.066269	0.018699	-0.132509	0.057434	-0.128923	0.065921		62
63	318-325	FRVQPTES	6	2.0637	0.092139	2.08358	0.080901	2.19009	0.106254		0.251454	0.116677	0.162876	0.087394	0.186396	0.111622		0.113629	0.120417	0.11755	0.081751	0.274702	0.106848		0.16525	0.108801	-0.157585	0.081222	0.207383	0.108259		63	400-406	FVIRGDE	-0.103988	0.017491	-0.206812	0.04729	-0.18272	0.069304		0.019435	0.138318	-0.190933	0.04637	-0.068235	0.073341		63
64	324-334	ESIVRFPNITN	9	n.a.	n.a.	1.8753	0.178376	2.52361	0.049769		n.a.	n.a.	-0.248167	0.195085	-0.032628	0.384398		n.a.	n.a.	-0.140702	0.194609	0.400748	0.236138		n.a.	n.a.	n.a.	n.a.	0.018814	0.265958		64	400-416	FVIRGDEVRQIAPGQTG	-1.32464	0.30251	-0.369367	0.364715	-1.17743	0.367222		n.a.	n.a.	n.a.	n.a.	n.a.	n.a.		64
65	337-348	PFGEVFNATRFA	10	0.889603	0.038487	1.90766	0.157528	3.70281	0.091741		0.964594	0.072543	0.670599	0.230992	-0.299812	0.09868		-0.076472	0.053667	0.293958	0.228142	0.358002	0.110989		0.039049	0.046435	0.030568	0.158955	0.295835	0.094574		65	400-422	FVIRGDEVRQIAPGQTGKIADYN	-0.572234	0.257099	-0.260936	0.330424	0.126902	0.497564		0.336955	0.223485	0.297195	0.306336	0.448853	0.498186		65
66	340-359	EVFNATRFASVYAWNRKRIS	19	2.36447	0.074456	3.40282	0.085418	5.84446	0.409788		0.122111	0.080249	0.641206	0.090512	0.717924	0.41088		-0.237987	0.128973	-0.122346	0.121988	0.320128	0.412121		-0.313678	0.190335	-0.332864	0.08561	-0.387443	0.421536		66	401-420	VIRGDEVRQIAPGQTGKIAD	-0.643213	0.204954	-0.436537	0.243012	-0.447078	0.373254		0.144542	0.146712	0.13049	0.221673	-0.08295	0.399777		66
67	348-361	ASVYAWNRKRISNC	13	2.49119	0.001298	2.51297	0.249751	5.09172	0.186892		1.35661	0.001836	n.a.	n.a.	n.a.	n.a.		-1.08797	0.063074	-0.429061	0.255712	-0.060708	0.191081		-0.982871	0.020809	-1.11379	0.250613	-0.195057	0.196203		67	401-421	VIRGDEVRQIAPGQTGKIADY	-0.500623	0.163042	-0.269316	0.310581	-0.125449	0.45313		0.274735	0.119305	0.338251	0.264115	0.28033	0.488434		67
68	351-361	YAWNRKRISNC	10	1.35009	0.086433	1.86189	0.167718	2.93199	0.159545		0.430935	0.10703	-0.214226	0.179739	-0.926848	0.180216		-0.20694	0.093083	-0.192669	0.178433	0.100225	0.185609		-0.045619	0.093264	-0.686084	0.167757	-0.212744	0.173013		68	407-421	VRQIAPGQTGKIADY	-0.652654	0.158492	-0.423368	0.198879	-0.684493	0.331336		-0.061634	0.131484	-0.109711	0.144819	-0.24353	0.291119		68
69	356-375	KRISNCVADYSVLYNSASFS	19	2.57267	0.086486	3.17787	0.251695	4.00917	0.196292		0.481713	0.192982	0.245055	0.263057	0.332049	0.202058		-0.027547	0.128064	0.219585	0.280156	0.743644	0.216477		0.052835	0.115977	-0.286102	0.251936	0.569829	0.2045		69	407-422	VRQIAPGQTGKIADYN	-0.758477	0.132328	-0.660766	0.328666	-0.704598	0.375663		0.263686	0.053504	-0.137836	0.227635	-0.239576	0.391702		69
70	375-387	STFKCYGVSPTKL	11	3.97389	0.058711	3.92444	0.199147	4.29482	0.046884		-0.063123	0.066123	-0.627525	0.206802	-0.567136	0.330413		-3.20578	0.120992	-2.29763	0.201681	-0.377744	0.143877		-3.27926	0.106165	-2.90757	0.251163	-1.9205	0.115363		70	421-429	YNYKLPDDF	0.112204	0.090809	0.028229	0.08223	0.001282	0.115398		0.076773	0.038123	0.134668	0.078506	0.200514	0.167748		70
71	378-387	KCYGVSPTKL	8	3.05268	0.018011	2.74632	0.153736	3.03663	0.262925		0.413637	0.066931	0.121745	0.156394	-0.087987	0.263207		-2.3802	0.05397	-1.54076	0.191577	0.205059	0.27228		-2.50671	0.052095	-2.16433	0.15386	-1.48677	0.264694		71	422-431	NYKLPDDFTG	-0.119771	0.064259	0.074371	0.084714	0.182921	0.12524		0.027434	0.117212	0.071215	0.118346	0.042465	0.126041		71
72	380-386	YGVSPTK	5	0.389159	0.052118	0.651163	0.03516	1.70446	0.050121		-0.100257	0.073906	-0.090994	0.054641	0.197234	0.110639		0.029349	0.070361	0.162721	0.041117	0.370539	0.070166		-0.076788	0.052759	0.108787	0.080113	0.1863	0.057028		72	423-429	YKLPDDF	0.299084	0.189431	0.667591	0.049813	0.414896	0.224876		0.087354	0.070026	0.312114	0.049954	0.439678	0.069207		72
73	386-407	KLNDLCFTNVYADSFVIRGDEV	21	3.67481	0.265488	6.14654	0.244759	6.71662	0.311306		0.042814	0.31235	-1.68857	0.246971	-1.30996	0.321149		1.31358	0.266737	0.135166	0.246113	0.462016	0.357542		0.552299	0.314736	-1.27252	0.276793	0.132234	0.353911		73	423-431	YKLPDDFTG	-0.135975	0.098768	n.a.	n.a.	n.a.	n.a.		n.a.	n.a.	n.a.	n.a.	-0.150651	0.131211		73
74	393-399	TNVYADS	6	0.228602	0.024171	0.682243	0.028929	1.19381	0.034338		0.194849	0.14369	n.a.	n.a.	0.154787	0.035254		-0.068867	0.033505	-0.106094	0.030777	-0.031447	0.039577		0.065035	0.029367	0.040728	0.094338	-0.063292	0.036606		74	432-441	CVIAWNSNNL	-1.0497	0.096966	-0.243465	0.148288	-0.46675	0.219402		-0.262307	0.135041	-0.106196	0.149607	-0.391292	0.224199		74
75	393-400	TNVYADSF	7	0.208329	0.013376	0.695593	0.055928	1.21932	0.064453		0.157459	0.134692	-0.127146	0.058726	-0.303344	0.172268		-0.033364	0.018496	-0.128044	0.066199	-0.067058	0.067668		0.075627	0.032485	0.15866	0.205161	-0.072875	0.069166		75	434-441	IAWNSNNL	-0.38269	0.174203	-0.041282	0.116454	-0.37249	0.251889		0.112939	0.110008	0.154931	0.113511	-0.108692	0.201977		75
76	400-406	FVIRGDE	6	0.135443	0.014504	0.352798	0.044519	0.822071	0.068643		-0.033568	0.06878	-0.062948	0.077521	0.124408	0.083583		-0.070347	0.01749	-0.205698	0.049504	-0.014324	0.071274		-0.08499	0.019606	0.055092	0.04642	-0.200186	0.071113		76	442-449	DSKVGGNYNYL	-1.94081	0.339909	-1.78885	0.182647	-1.57277	0.367451		-0.514916	0.173481	-0.673548	0.206429	-0.928156	0.222172		76
77	400-416	FVIRGDEVRQIAPGQTG	15	3.02284	0.111468	2.66662	0.255088	2.89831	0.367131		-0.796605	0.167684	-0.378203	0.268021	0.074883	0.374392		-0.219806	0.250656	0.280629	0.258645	0.761023	0.406329		-0.415344	0.139415	-0.339644	0.255088	0.541205	0.392223		77	453-467	YRLFRKSNLKPFERD	-0.21989	0.21211	-0.450195	0.268782	-0.609752	0.286471		0.140032	0.132173	0.068794	0.147366	0.50195	0.358945		77
78	400-421	FVIRGDEVRQIAPGQTGKIADY	20	2.7155	0.108876	3.9534	0.198399	6.50965	0.213698		n.a.	n.a.	n.a.	n.a.	0.566905	0.215553		-0.536286	0.109536	-0.31015	0.199449	0.318631	0.298179		-0.421894	0.158268	-0.394727	0.198616	-0.771634	0.2139		78	456-470	FRKSNLKPFERDIST	-0.601369	0.255997	-0.133411	0.257833	-0.137541	0.234812		0.063716	0.130683	0.209851	0.180801	0.252383	0.231833		78
79	400-422	FVIRGDEVRQIAPGQTGKIADYN	21	2.87616	0.220147	4.19419	0.285846	7.12014	0.496743		-0.268617	0.252928	0.317776	0.293811	1.03044	0.497632		-0.311868	0.25784	-0.320207	0.322787	0.29958	0.610485		-0.310484	0.312379	-0.389089	0.391347	-0.527498	0.67032		79	456-471	FRKSNLKPFERDISTE	-0.483921	0.087413	-0.238733	0.199073	-0.510421	0.105905		-0.083868	0.186099	0.053978	0.266714	0.110651	0.210006		79
80	401-420	VIRGDEVRQIAPGQTGKIAD	18	2.92691	0.144755	4.30552	0.213734	6.83766	0.373246		0.071113	0.166372	0.113617	0.30096	0.559566	0.382036		-0.135939	0.171376	-0.202723	0.279978	0.23553	0.425333		-0.153212	0.170573	-0.585006	0.555637	-0.529303	0.414006		80	471-486	EIYQAGSTPCNGVEGF	-0.999441	0.225869	-0.216541	0.114103	-0.464141	0.307584		0.172957	0.051299	0.135946	0.052361	-0.100591	0.30772		80
81	401-421	VIRGDEVRQIAPGQTGKIADY	19	2.81201	0.079189	4.20379	0.246881	6.92529	0.439206		-0.070377	0.216985	0.264156	0.288099	0.73302	0.443753		-0.147407	0.084145	-0.237967	0.269598	0.323817	0.502371		0.086745	0.115599	-0.464893	0.458712	-0.491987	0.442792		81	471-487	IYQAGSTPCNGVEGF	-1.14473	0.304711	-0.238751	0.280654	-0.542569	0.254441		n.a.	n.a.	n.a.	n.a.	n.a.	n.a.		81
82	407-420	VRQIAPGQTGKIAD	12	2.13104	0.104922	2.91213	0.151656	4.58787	0.285085		0.030649	0.237537	-0.125087	0.181076	0.218926	0.288747		-0.164577	0.114947	-0.102028	0.174561	0.229294	0.330263		-0.03591	0.107722	-0.105794	0.444946	-0.278701	0.302179		82	487-494	NCYFPLQS	-0.404278	0.179953	-0.295264	0.109561	-0.299133	0.245729		0.012841	0.123826	0.163479	0.067289	0.004544	0.153855		82
83	407-421	VRQIAPGQTGKIADY	13	2.04677	0.095865	2.9205	0.121665	4.91254	0.27821		0.095221	0.24434	-0.142904	0.174578	0.347381	0.28293		-0.164729	0.098315	-0.129602	0.142715	0.238209	0.306036		-0.024684	0.104513	-0.180188	0.389605	-0.387602	0.287912		83	487-495	NCYFPLQSY	-0.416562	0.092916	-0.49124	0.080533	-0.563451	0.157818		0.012506	0.10542	0.004452	0.097418	-0.154306	0.184766		83
84	407-422	VRQIAPGQTGKIADYN	14	2.24537	0.04586	3.15703	0.211395	5.44847	0.375345		0.041246	0.356479	-0.167632	0.226953	0.336525	0.377574		-0.283871	0.069766	-0.157894	0.236349	0.142765	0.429709		-0.107115	0.061258	-0.267025	0.385273	-0.50155	0.385467		84	491-510	PLQSYGFQPTNGVGYQPYRV	-1.03364	0.423885	-0.037197	0.330895	-0.315009	0.41734		0.343153	0.249268	0.557201	0.319393	-0.027013	0.418357		84
85	412-420	PGQTGKIAD	7	1.45334	0.080336	1.98089	0.052773	3.17321	0.103799		-0.018666	0.169653	-0.241581	0.10706	-0.378818	0.136984		-0.090614	0.084715	-0.101543	0.078125	-0.171811	0.106856		-0.045543	0.099163	-0.160743	0.081745	-0.366671	0.114433		85	491-512	PLQSYGFQPTNGVGYQPYRVVV	-1.0418	0.363077	-0.410846	0.277569	-1.0836	0.487016		-0.171201	0.068783	0.250622	0.309677	-0.403133	0.328368		85
86	421-429	YNYKLPDDF	7	0.443243	0.030192	0.748414	0.061955	1.96448	0.115342		0.316814	0.031568	0.584871	0.06206	-0.552279	0.115398		-0.011689	0.031471	0.058909	0.121754	0.072893	0.12291		-0.20322	0.070008	0.270654	0.065806	-0.139714	0.117783		86	495-510	YGFQPTNGVGYQPYRV	-0.75906	0.336382	-0.215273	0.270464	-0.313602	0.359704		0.189561	0.234937	0.197306	0.24207	0.052256	0.261868		86
87	422-431	NYKLPDDFTG	8	0.89663	0.061304	1.062	0.082495	2.15963	0.123749		0.082385	0.123174	0.112402	0.213213	0.14504	0.129609		0.145097	0.064259	-0.019909	0.110791	-0.19529	0.14661		-0.311382	0.092537	-0.189272	0.092323	-0.422484	0.133664		87	495-512	YGFQPTNGVGYQPYRVVV	-0.725392	0.350948	-0.214168	0.297252	-0.267061	0.33371		n.a.	n.a.	n.a.	n.a.	n.a.	n.a.		87
88	423-429	YKLPDDF	5	0.494105	0.01638	0.541008	0.047836	1.05493	0.065765		n.a.	n.a.	n.a.	n.a.	n.a.	n.a.		-0.017382	0.054725	0.058374	0.052381	-0.019025	0.083413		-0.279228	0.043665	0.006205	0.070715	-0.198132	0.070434		88	495-513	YGFQPTNGVGYQPYRVVVL	-0.750847	0.378471	-0.102923	0.380376	-0.247234	0.440599		0.339395	0.281825	0.368982	0.17604	0.075765	0.26102		88
89	423-431	YKLPDDFTG	7	0.754762	0.073223	0.772002	0.08775	1.46828	0.110082		-0.083068	0.135811	-0.025789	0.133738	0.235919	0.175768		-0.036374	0.099601	0.031227	0.111371	-0.129197	0.130228		-0.241206	0.092843	-0.138049	0.114261	-0.317689	0.125196		89	496-510	GFQPTNGVGYQPYRV	-0.960932	0.201832	-0.173318	0.248783	-0.527323	0.29127		n.a.	n.a.	n.a.	n.a.	n.a.	n.a.		89
90	432-441	CVIAWNSNNL	9	2.18513	0.096957	2.01058	0.148282	2.416	0.219398		-0.469645	0.350199	-0.489486	0.174498	-0.416506	0.219802		-0.13622	0.177129	0.230641	0.162687	0.71011	0.226434		-0.004174	0.105478	-0.32655	0.14854	-0.064019	0.23289		90	503-513	VGYQPYRVVVL	-0.524683	0.142102	-0.184327	0.220556	-0.289861	0.17482		-0.223722	0.240262	0.001145	0.138568	-0.249564	0.186701		90
91	434-441	IAWNSNNL	7	2.02889	0.078935	1.92791	0.090852	2.11377	0.176122		-0.167328	0.229554	-0.124677	0.093768	-0.080403	0.180606		-0.063605	0.13262	0.085081	0.099885	0.179025	0.203593		0.093093	0.082757	-0.209366	0.091043	0.118158	0.195478		91	516-533	ELLHAPATVCGPKKSTNL	-1.94165	0.498835	-0.995812	0.417369	-1.02109	0.637824		-0.989503	0.347601	-0.274255	0.260461	-0.421988	0.424032		91
92	442-449	DSKVGGNY	7	2.34329	0.096332	2.04407	0.133988	2.11752	0.155343		-0.148518	0.147936	0.003226	0.18128	0.318447	0.163477		-0.107008	0.240367	0.147996	0.138986	0.246673	0.179482		-0.009013	0.106992	0.065425	0.269083	0.164893	0.163235		92	534-541	VKNKCVNF	-0.363017	0.158764	-0.504858	0.150044	0.035866	0.169565		-0.334972	0.143581	-0.129191	0.138056	0.189865	0.171517		92
93	442-452	DSKVGGNYNYL	10	3.33306	0.153498	3.4277	0.176512	3.64143	0.19469		n.a.	n.a.	n.a.	n.a.	n.a.	n.a.		-0.145322	0.167013	0.11975	0.186176	0.446711	0.215084		0.084323	0.172044	-0.060363	0.176816	0.288968	0.208424		93	542-552	NFNGLTGTGVL	-0.781329	0.175732	-0.706562	0.239663	-0.493126	0.324145		-0.664797	0.159522	-0.612291	0.190957	-0.335073	0.240721		93
94	453-467	YRLFRKSNLKPFERD	13	1.11396	0.023967	2.59336	0.074865	3.68545	0.249216		0.176014	0.133462	0.222513	0.108071	1.03228	0.353529		-0.278155	0.032009	-0.371625	0.157967	0.580432	0.288314		-0.11387	0.060173	-0.189226	0.38301	0.279631	0.256545		94	544-552	NGLTGTGVL	-0.69622	0.116154	-0.56061	0.170153	-0.247353	0.153435		-0.479275	0.126741	-0.465783	0.116668	-0.235841	0.145889		94
95	456-467	FRKSNLKPFERD	10	0.904089	0.04834	2.10085	0.086469	3.03625	0.089378		0.056001	0.081616	0.048809	0.093164	0.259567	0.128627		-0.10155	0.057035	-0.07098	0.113507	0.240648	0.122993		-0.041027	0.059818	-0.332964	0.087656	0.070927	0.098884		95	553-564	TESNKKFLPFQQ	-0.678281	0.174883	-0.087218	0.178191	-0.030291	0.194092		0.165261	0.136495	0.309094	0.178326	0.449606	0.21316		95
96	456-470	FRKSNLKPFERDIST	13	2.51061	0.066376	3.64205	0.156418	4.62302	0.217052		0.279854	0.079048	0.481093	0.159403	0.705112	0.257209		-0.255174	0.107379	-0.147433	0.206805	0.261633	0.225202		-0.130244	0.092577	-0.034462	0.388194	0.203688	0.227738		96	553-565	TESNKKFLPFQQF	-0.941693	0.362747	-0.089573	0.243477	-0.286946	0.39174		0.134925	0.314844	0.341014	0.215676	0.12953	0.239662		96
97	456-471	FRKSNLKPFERDISTE	14	3.43008	0.076868	4.73862	0.106838	5.76424	0.105845		0.452094	0.07695	0.563075	0.106898	0.805047	0.12044		-0.153549	0.077681	-0.029447	0.134838	0.480504	0.211198		-0.196552	0.086495	-0.024846	0.249808	0.125604	0.146674		97	553-568	TESNKKFLPFQQFGRD	-1.47612	0.251054	-0.305316	0.264673	-0.462507	0.342597		0.04046	0.294233	0.015641	0.262696	-0.034033	0.351369		97
98	471-486	EIYQAGSTPCNGVEGF	14	4.63257	0.049137	4.65724	0.050244	4.84914	0.307367		0.685155	0.050476	n.a.	n.a.	0.624943	0.307584		0.026715	0.050476	0.289036	0.051554	0.381708	0.307586		0.222163	0.049555	0.276761	0.098328	0.360759	0.333231		98	569-582	IADTTDAVRDPQTL	-1.0761	0.219603	-0.444209	0.180864	-0.245968	0.244243		-0.54696	0.192018	-0.205478	0.157191	-0.149862	0.228196		98
99	471-487	EIYQAGSTPCNGVEGFN	15	5.44873	0.289006	5.12771	0.364411	5.32668	0.291993		0.37398	0.29082	n.a.	n.a.	n.a.	n.a.		-0.310078	0.487934	0.298508	0.401051	0.578645	0.355917		0.172696	0.394102	0.409483	0.364503	0.48429	0.324406		99	569-583	IADTTDAVRDPQTLE	-1.25246	0.213441	-0.656635	0.142819	-0.365495	0.174761		-0.691627	0.405501	-0.260559	0.348196	-0.139843	0.371099		99
100	472-486	IYQAGSTPCNGVEGF	13	4.80333	0.304413	4.14016	0.28033	4.3671	0.254084		-0.436586	0.617743	n.a.	n.a.	0.209392	0.471029		-0.285646	0.368016	0.389417	0.335295	0.455164	0.280346		-0.479258	0.352499	0.168138	0.577767	0.322756	0.264825		100	575-582	AVRDPQTL	-0.360133	0.087029	0.079954	0.078898	-0.022216	0.091177		0.043652	0.08545	0.320975	0.071118	0.130048	0.092004		100
101	487-494	NCYFPLQS	6	1.73911	0.066955	2.32948	0.059252	2.82607	0.151268		0.277205	0.201385	0.161199	0.126981	0.171911	0.255599		0.030881	0.094753	0.128749	0.078709	0.213396	0.170467		0.100202	0.067971	-0.11608	0.059815	0.10449	0.16062		101	576-582	VRDPQTL	-0.3732	0.088353	0.051527	0.036858	-0.126347	0.049937		n.a.	n.a.	-0.022237	0.040228	-0.097534	0.051668		101
102	487-495	NCYFPLQSY	7	1.74703	0.092305	2.82162	0.079828	3.31515	0.157459		-0.234935	0.215743	-0.19329	0.153786	-0.059316	0.174619		0.092675	0.101818	0.151077	0.129999	0.301243	0.196674		0.242923	0.116954	0.250209	0.182956	0.195732	0.176552		102	576-583	VRDPQTLE	0.225584	0.102917	-0.706698	0.033182	-0.777227	0.095003		n.a.	n.a.	n.a.	n.a.	n.a.	n.a.		102
103	488-495	CYFPLQSY	6	1.23777	0.077593	2.23944	0.114563	2.68158	0.125389		-0.228707	0.168444	n.a.	n.a.	n.a.	n.a.		0.022515	0.105092	0.169212	0.119415	0.174695	0.135307		0.067923	0.112458	n.a.	n.a.	0.132509	0.15396		103	584-592	ILDITPCSF	-0.494759	0.178598	-0.520456	0.151251	-0.30654	0.231339		-0.200516	0.097417	-0.475356	0.092829	-0.170395	0.156035		103
104	491-510	PLQSYGFQPTNGVGYQPYRV	16	5.21665	0.239362	5.45224	0.302324	6.26877	0.412423		-0.589947	0.503825	-1.07838	0.333865	-2.18182	0.459391		-0.011981	0.242099	-0.034608	0.303323	0.303005	0.427751		0.230895	0.244309	0.576935	0.302786	0.009567	0.43434		104	585-592	LDITPCSF	-0.46168	0.085693	-0.454071	0.170566	-0.414687	0.225033		-0.218916	0.085369	-0.321748	0.089933	-0.130619	0.208481		104
105	491-512	PLQSYGFQPTNGVGYQPYRVVV	18	5.23184	0.028569	5.45915	0.029531	6.36424	0.232018		-0.67703	0.432043	-0.548769	0.196158	-0.47542	0.376242		-0.104037	0.146408	-0.056445	0.103439	0.130441	0.256507		-0.072422	0.097919	-0.004207	0.24726	-0.112921	0.269885		105	586-592	DITPCSF	-0.372631	0.12178	-0.180887	0.151899	-0.096386	0.11094		-0.188677	0.160776	-0.180196	0.094678	-0.072428	0.107954		105
106	495-510	YGFQPTNGVGYQPYRV	13	3.99945	0.212885	3.8023	0.162681	4.20275	0.257831		-0.184309	0.30025	-0.046754	0.184772	0.188159	0.265171		0.061738	0.241216	0.263016	0.169702	0.330975	0.288127		0.14722	0.220226	0.049305	0.162731	0.167658	0.263372		106	586-596	DITPCSFGGVS	-0.849039	0.1895	-0.500599	0.213309	-0.60998	0.268787		-0.445069	0.200687	-0.173965	0.190683	-0.325162	0.292376		106
107	495-512	YGFQPTNGVGYQPYRVVV	15	3.79686	0.169251	3.69247	0.138146	4.15875	0.252352		-0.120896	0.468605	-0.07206	0.164503	-0.045939	0.392342		0.0451	0.272481	0.215879	0.15368	0.229984	0.27575		0.176435	0.188374	0.097425	0.37082	-0.059099	0.275833		107	621-633	PVAIHADQLTPTW	-0.369288	0.210108	0.698381	0.242261	0.774616	0.281121		0.382264	0.219654	1.0287	0.207237	0.885396	0.241834		107
108	495-513	YGFQPTNGVGYQPYRVVVL	16	3.91836	0.185461	3.72667	0.107598	4.15257	0.258417		-0.247962	0.273419	-0.19866	0.195089	0.115847	0.422744		0.063638	0.221574	0.238832	0.120567	0.191998	0.277289		0.068778	0.22389	0.348749	0.113996	-0.023176	0.269194		108	627-633	DQLTPTW	-0.680473	0.171048	-0.06577	0.077228	-0.190047	0.144564		-0.335948	0.171489	0.014195	0.104445	-0.00489	0.114547		108
109	496-510	GFQPTNGVGYQPYRV	12	3.55241	0.189501	3.412	0.131651	3.87759	0.28415		0.160216	0.192976	0.250993	0.132372	0.129498	0.294086		-0.003476	0.287365	0.28106	0.132372	0.120854	0.285304		0.126539	0.194627	-0.005196	0.411932	0.029201	0.285873		109	627-643	DQLTPTWRVYSTGSNVF	-2.38263	0.476691	-0.471156	0.338096	-0.798635	0.57507		-1.44244	0.319229	-0.025039	0.281769	-0.504659	0.579555		109
110	503-513	VGYQPYRVVVL	9	0.981367	0.127192	0.908462	0.12356	1.12813	0.099487		0.252538	0.173308	0.162071	0.153641	-0.046715	0.164764		0.030126	0.160297	0.102493	0.180116	-0.042471	0.132676		0.04806	0.163664	0.303569	0.138224	-0.172536	0.181597		110	634-642	RVYSTGSNVF	-1.09574	0.279794	-0.40889	0.203648	-0.648636	0.206423		-0.649431	0.265622	-0.20728	0.175092	-0.359464	0.18916		110
111	514-533	SFELLHAPATVCGPKKSTNL	17	4.65142	0.186005	4.23114	0.29397	4.63683	0.250889		0.122479	0.186021	n.a.	n.a.	0.442485	0.511284		-0.275351	0.433874	0.437543	0.353232	0.866948	0.308249		-0.333866	0.190571	0.187626	0.294085	0.610446	0.295738		111	642-650	VFQTRAGCL	-1.11628	0.204287	-0.616246	0.313313	-0.633195	0.317246		-0.676127	0.213159	-0.355507	0.220124	-0.442973	0.246388		111
112	515-533	FELLHAPATVCGPKKSTNL	16	4.35574	0.153701	4.25107	0.160152	4.69512	0.313478		-0.360618	0.223553	-0.421826	0.394106	n.a.	n.a.		-0.230754	0.429664	-0.137367	0.219297	0.509775	0.350216		-0.440877	0.204125	-0.117181	0.209368	0.321352	0.366761		112	643-650	FQTRAGCL	-0.650948	0.199191	-0.563275	0.315292	-0.663394	0.31074		-0.418686	0.163762	-0.188073	0.220464	-0.369206	0.310703		112
113	516-533	ELLHAPATVCGPKKSTNL	15	4.00598	0.328023	3.73668	0.184073	3.82761	0.401228		-0.853287	0.414776	-0.578706	0.234459	-0.200918	0.412518		-0.572893	0.448421	-0.087266	0.223442	0.622349	0.4317		-0.817672	0.360528	-0.588877	0.253168	0.525214	0.432925		113	664-671	IPIGAGIC	-0.967344	0.132966	-0.257388	0.150701	-0.295236	0.207196		-0.670112	0.107025	-0.053943	0.117179	-0.176769	0.1083		113
114	517-532	LLHAPATVCGPKKSTN	13	2.90875	0.228997	2.65379	0.246391	2.95363	0.220791		-0.518668	0.48016	-0.590783	0.246863	-0.248106	0.221318		-0.196762	0.289272	0.324178	0.261075	0.813908	0.328517		-0.218228	0.22971	-0.35302	0.246928	0.522176	0.283137		114	664-673	IPIGAGICAS	-1.59929	0.320598	-0.455025	0.233872	-0.470566	0.207547		-1.08874	0.153597	0.010508	0.162542	-0.321724	0.173439		114
115	517-533	LLHAPATVCGPKKSTNL	14	3.46069	0.249327	3.48214	0.443292	3.80729	0.382444		-0.2992	0.252838	0.807481	0.445277	n.a.	n.a.		-0.05414	0.419292	0.212444	0.467341	0.706646	0.461789		-0.246043	0.27222	-0.205029	0.459815	0.434837	0.454977		115	665-671	PIGAGIC	-0.66308	0.094029	-0.040558	0.101164	-0.097111	0.130801		-0.366836	0.069451	0.015902	0.085955	-0.091471	0.128021		115
116	534-541	VKNKCVNF	7	0.934122	0.115474	1.73343	0.115637	1.88612	0.169563		0.064929	0.241567	-0.250743	0.134578	-0.424966	0.169565		0.591994	0.15185	0.196917	0.12597	0.283424	0.183472		0.129426	0.125882	0.035133	0.127957	0.215515	0.174105		116	672-690	ASYQTQTNSPGSASSVASQ	-0.6138	0.025	-0.1323	0.0933	0.5196	0.053		0.6331	0.1856	0.313	0.122	-0.5159	0.1104		116
117	542-552	NFNGLTGTGVL	10	1.85693	0.12451	3.26272	0.189625	3.47544	0.223513		-0.98361	0.164997	-2.36152	0.198686	-1.96932	0.350008		0.79202	0.213442	0.224548	0.193357	0.519187	0.240604		0.281808	0.154583	-0.011508	0.18965	0.379498	0.235522		117	672-692	ASYQTQTNSPGSASSVASQSI	n.a.		n.a.	n.a.	n.a.	n.a.		-0.2691	0.0297	-0.4392	0.1393	-0.3478	0.2989		117
118	543-555	FNGLTGTGVLTES	12	3.76555	0.132211	3.4255	0.134486	3.71309	0.164793		-0.214505	0.467842	n.a.	n.a.	n.a.	n.a.		-0.162622	0.32133	0.430836	0.135037	0.356178	0.19424		0.067718	0.146823	0.264362	0.135727	0.260067	0.193193		118	672-694	SYQTQTNSPGSASSVASQSIIA	-1.46582	0.223957	-2.46711	0.190452	-1.79696	0.26258		-0.790672	0.114129	-2.1218	0.199237	-1.31423	0.370897		118
119	544-552	NGLTGTGVL	8	1.32115	0.111067	2.61594	0.109	2.76006	0.128234		-0.711276	0.132891	-2.03412	0.112061	-1.61182	0.144326		0.78799	0.229795	0.209312	0.111749	0.374882	0.138951		0.287233	0.125094	0.218072	0.231149	0.271106	0.134303		119	674-690	YQTQTNSPGSASSVASQ	-0.6148	0.1515	-0.3015	0.0281	-0.7659	0.122		0.203	0.1171	-0.2362	0.1537	-0.5354	0.1763		119
120	546-552	LTGTGVL	6	1.06595	0.08685	1.97325	0.071915	2.14069	0.138248		-0.065802	0.143828	-0.287235	0.071948	-0.153693	0.138265		0.567195	0.126654	0.21317	0.096177	0.253698	0.141184		0.026505	0.128131	-0.128904	0.072615	0.181698	0.145859		120	675-690	QTQTNSPGSASSVASQ	-0.675	0.061	-0.3263	0.1393	-0.8651	0.0297		n.a.	n.a.	n.a.	n.a.	n.a.	n.a.		120
121	553-564	TESNKKFLPFQQ	10	3.7971	0.133527	3.3344	0.176588	3.54019	0.192621		-0.569974	0.306294	0.83763	0.203252	0.761755	0.323475		0.253723	0.176128	0.547714	0.181138	0.319601	0.382173		0.122126	0.196033	0.068543	0.178836	0.201316	0.218132		121	693-699	IAYTMSL	-0.801513	0.077764	-0.117354	0.055711	-0.105063	0.06666		-0.011544	0.059934	0.097355	0.031981	-0.138408	0.041097		121
122	553-565	TESNKKFLPFQQF	11	3.62151	0.281826	3.36621	0.177166	3.53315	0.22077		-1.67675	0.317777	-0.854153	0.207211	0.13252	0.242591		-0.085608	0.354456	0.191395	0.199577	0.399476	0.253777		0.068755	0.305992	-0.031771	0.375225	0.28144	0.246256		122	695-702	YTMSLGAE	-0.493614	0.133385	0.189892	0.174976	0.371724	0.181102		0.064113	0.128348	0.334926	0.110474	0.342152	0.110935		122
123	553-568	TESNKKFLPFQQFGRD	14	4.5116	0.251039	4.19429	0.231927	4.3892	0.290886		-2.43317	0.282866	-1.34462	0.242311	0.020807	0.2935		-0.402303	0.362665	-0.060295	0.24006	0.517079	0.301375		-0.148008	0.277382	-0.425444	0.237056	0.214957	0.29947		123	696-704	TMSLGAENS	-1.09609	0.089508	-0.208561	0.145009	0.016693	0.215881		-0.766011	0.064201	0.08925	0.129739	0.055102	0.125966		123
124	555-568	SNKKFLPFQQFGRD	12	4.16509	0.138958	3.79307	0.201015	4.07935	0.148891		n.a.	n.a.	n.a.	n.a.	n.a.	n.a.		0.012488	0.140953	0.906121	0.257718	0.543877	0.232769		-0.07305	0.18533	-0.024181	0.220687	0.288669	0.159246		124	715-730	PTNFTISVTTEILPVS	-0.673415	0.143526	-0.318591	0.219193	-0.188731	0.206298		0.017328	0.137821	0.097902	0.17371	0.159238	0.206238		124
125	569-575	IADTTDA	6	1.36243	0.054308	1.22664	0.09094	1.29868	0.079762		-0.262046	0.0609	-0.089594	0.095103	-0.027121	0.082836		-0.154982	0.106888	-0.043963	0.091205	0.136573	0.097435		-0.060062	0.058935	-0.115382	0.222269	0.043914	0.080049		125	724-731	TEILPVSM	-0.391581	0.077544	-0.310766	0.086557	-0.634938	0.101553		-0.294563	0.080826	-0.2625	0.080998	-0.598056	0.10089		125
126	569-581	IADTTDAVRDPQT	11	2.62619	0.20197	3.96502	0.20938	4.21252	0.218375		-0.651915	0.211415	-1.47681	0.267861	-0.725292	0.277514		0.613462	0.261671	0.064518	0.242152	0.263659	0.26236		0.315939	0.238452	-1.19275	0.21612	-0.268205	0.257966		126	725-731	EILPVSM	-0.163264	0.043771	-0.055743	0.038253	-0.486167	0.117032		-0.171079	0.046076	-0.120484	0.041024	-0.456943	0.060317		126
127	569-582	IADTTDAVRDPQTL	12	2.72005	0.186399	4.05682	0.156968	4.23084	0.20122		-1.10745	0.20861	-1.33498	0.159709	-1.15694	0.224269		0.483506	0.187863	-0.02919	0.163285	0.372099	0.201975		0.141082	0.274939	-0.152467	0.459221	0.360149	0.201392		127	741-748	YICGDSTE	-0.242077	0.125725	0.218118	0.215496	n.a.	n.a.		n.a.	n.a.	0.187208	0.215907	0.134104	0.133718		127
128	569-583	IADTTDAVRDPQTLE	13	3.19402	0.211296	5.14987	0.140682	5.45086	0.16919		n.a.	n.a.	n.a.	n.a.	n.a.	n.a.		n.a.	n.a.	-0.090045	0.142819	0.340534	0.184975		0.409337	0.232819	-0.121136	0.304184	0.121199	0.180159		128	753-759	LLQYGSF	-0.512327	0.133622	-0.189379	0.105816	-0.434482	0.124536		0.008796	0.092193	-0.035168	0.100851	-0.161817	0.109948		128
129	575-582	AVRDPQTL	6	1.35671	0.08485	2.06816	0.070356	2.30301	0.090375		-0.529426	0.142249	-0.336545	0.081008	-0.254991	0.094814		0.477616	0.143519	0.141332	0.077325	0.173661	0.099122		0.17514	0.086049	0.065468	0.158097	0.150078	0.091011		129	763-769	LNRALTG	-0.409404	0.159532	-0.315775	0.116622	-0.408638	0.196857		-0.529096	0.137228	-0.455171	0.137258	-0.30055	0.185169		129
130	575-583	AVRDPQTLE	7	1.87231	0.059875	3.13998	0.084272	3.3547	0.080127		-0.919388	0.067448	-0.856432	0.103137	-0.577931	0.084017		0.750022	0.06125	n.a.	n.a.	0.24312	0.087026		0.512148	0.060944	0.195774	0.08542	0.255604	0.100077		130	764-771	NRALTGIA	-0.477041	0.105853	-0.193673	0.105716	-0.124358	0.163892		-0.454266	0.138232	0.203931	0.105173	0.138155	0.151419		130
131	576-582	VRDPQTL	5	1.26706	0.085327	1.82847	0.036304	1.92349	0.049529		-0.63071	0.160758	-0.458432	0.051895	-0.273122	0.083616		0.455353	0.090718	0.066091	0.04249	0.017627	0.059378		0.074275	0.111845	-0.10946	0.063058	0.079268	0.073157		131	770-782	IAVEQDKNTQEVF	-1.12142	0.130459	-1.0847	0.202152	-1.17129	0.29266		-0.939276	0.131728	-0.894438	0.211935	-0.714311	0.242597		131
132	576-583	VRDPQTLE	6	1.4566	0.093967	2.60031	0.032856	2.79696	0.063226		0.640052	0.106846	-0.233473	0.069694	-0.268157	0.064478		0.582173	0.155789	0.148999	0.047878	0.145495	0.064459		0.191132	0.095072	0.238494	0.032881	0.020794	0.066784		132	774-782	QDKNTQEVF	-0.411637	0.032123	-0.619266	0.070909	-0.627736	0.155516		-0.249586	0.099574	-0.290343	0.116398	-0.141923	0.180847		132
133	584-592	ILDITPCSF	7	1.31751	0.069084	2.17453	0.076149	2.39342	0.091028		-0.341243	0.106566	-1.31411	0.077641	-1.23504	0.126903		0.358642	0.133218	0.202491	0.087793	0.257914	0.095222		0.155817	0.092272	0.054554	0.076171	0.173934	0.108521		133	783-796	AQVKQIYKTPPIKD	n.a.	n.a.	n.a.	n.a.	n.a.	n.a.		n.a.	n.a.	0.193539	0.188386	0.04497	0.206266		133
134	585-592	LDITPCSF	6	1.55441	0.084862	2.18413	0.089747	2.43426	0.208389		n.a.	n.a.	n.a.	n.a.	n.a.	n.a.		0.339331	0.111094	0.360137	0.100274	0.356249	0.230295		0.179377	0.0903	0.126033	0.089832	0.20674	0.223659		134	800-815	FNFSQILPDPSKPSKR	-1.08341	0.148783	-0.775608	0.210262	-0.582207	0.106558		-0.435954	0.182839	-0.186286	0.181582	-0.217555	0.136567		134
135	586-592	DITPCSF	5	1.11954	0.063021	1.3626	0.091468	1.49211	0.102006		-0.347229	0.128346	-0.344145	0.093317	-0.211388	0.171385		0.143173	0.085337	0.122331	0.097326	0.16975	0.10784		0.021165	0.072595	-0.006633	0.168612	0.152536	0.109779		135	821-828	LLFNKVTL	-0.621428	0.226923	-0.372788	0.219579	-0.549568	0.216311		-0.024242	0.179897	-0.135487	0.183208	-0.144438	0.171037		135
136	586-596	DITPCSFGGVS	9	2.73759	0.173656	3.11877	0.19026	3.37546	0.222363		-0.120164	0.229405	-0.40282	0.190442	-0.514819	0.230279		0.182731	0.264078	0.219843	0.204303	0.363578	0.249709		0.252413	0.191021	0.188741	0.190746	0.291343	0.228565		136	822-828	LFNKVTL	-0.658596	0.231967	-0.281587	0.116173	-0.21543	0.177685		-0.123128	0.16047	0.072547	0.087908	-0.049183	0.195757		136
137	599-615	TPGTNTSNQVAVLYQDV	15	3.63435	0.188922	3.91794	0.34509	4.50841	0.159169		n.a.	n.a.	n.a.	n.a.	n.a.	n.a.		-2.39949	0.189505	-2.16376	0.362928	-0.028099	0.159169		-1.4687	0.201939	-1.89044	0.351765	-0.438861	0.218546		137	822-833	LFNKVTLADAGF	-0.829824	0.107347	0.175895	0.144893	0.007042	0.41236		-0.044069	0.178219	0.350581	0.225649	0.344364	0.219099		137
138	617-632	CTEVPVAIHADQLTPT	13	2.34677	0.033516	3.04567	0.054118	3.94214	0.10791		-0.519065	0.230301	-0.231964	0.063656	1.04025	0.112995		0.39215	0.047399	-0.89857	0.063656	0.416719	0.206333		0.382005	0.050172	-0.666123	0.108085	0.500825	0.114185		138	823-833	FNKVTLADAGF	-1.06471	0.221805	-0.10747	0.241437	-0.081825	0.3003		-0.229001	0.228751	0.204092	0.244516	-0.132978	0.325857		138
139	621-633	PVAIHADQLTPTW	10	3.24388	0.110205	3.06107	0.154055	3.19807	0.199977		n.a.	n.a.	n.a.	n.a.	n.a.	n.a.		-0.231403	0.178818	-0.146414	0.170279	0.217119	0.204546		0.047334	0.122205	-0.250967	0.215957	0.16994	0.201273		139	824-833	NKVTLADAGF	-1.03507	0.303689	-0.519653	0.191309	-0.314681	0.207438		-0.067701	0.142555	0.235543	0.143018	-0.153425	0.208939		139
140	627-633	DQLTPTW	5	2.07447	0.143714	2.10514	0.048849	2.22296	0.079233		0.199346	0.225217	0.089959	0.063159	0.091856	0.086152		0.157245	0.16515	0.149784	0.065823	0.155622	0.097737		0.182624	0.152258	0.075818	0.065023	0.118168	0.10603		140	833-841	FIKQYGDCL	n.a.	n.a.	n.a.	n.a.	n.a.	n.a.		0.186101	0.12703	0.075903	0.108505	0.307269	0.166703		140
141	627-643	DQLTPTWRVYSTGSNVF	15	7.133	0.312895	7.18027	0.228056	7.62762	0.554742		0.810742	0.366632	0.506573	0.254621	-0.209748	0.590666		0.201618	0.529036	0.283343	0.321212	0.583021	0.608929		0.6722	0.389006	0.534543	0.233091	0.356984	0.583533		141	834-848	IKQYGDCLGDIAARD	-1.15613	0.239768	0.230247	0.108046	0.315783	0.157689		0.015517	0.176764	0.612446	0.186107	0.698234	0.179568		141
142	634-642	RVYSTGSNV	8	2.71791	0.101461	2.43447	0.176681	2.59595	0.191654		0.117004	0.219493	0.461906	0.232356	0.211379	0.202766		-0.090381	0.172577	0.177849	0.186598	0.364813	0.203873		-0.007941	0.137153	-0.158426	0.184038	0.256428	0.198326		142	852-858	AQKFNGL	-0.023381	0.067505	0.192016	0.116476	0.277593	0.104274		0.314438	0.092491	0.250839	0.055878	0.648635	0.153422		142
143	634-643	RVYSTGSNVF	9	2.79293	0.226259	2.9165	0.15289	3.10249	0.155532		0.140886	0.279059	-0.009367	0.208337	-0.044093	0.183905		-0.13242	0.241775	0.091655	0.181996	0.369032	0.196745		0.202537	0.249449	-0.174157	0.175137	0.246645	0.192627		143	858-866	LTVLPPLLT	-0.586031	0.159817	-0.127295	0.186819	-0.289087	0.257324		0.063247	0.166473	0.088494	0.130579	-0.095298	0.143491		143
144	636-642	YSTGSNV	6	1.88707	0.065445	1.64403	0.066349	1.75045	0.100436		0.123113	0.174079	0.236318	0.203703	0.086598	0.200902		-0.134568	0.119871	0.019157	0.082566	0.168243	0.138387		0.02105	0.075564	-0.003578	0.067505	0.086823	0.135998		144	859-865	TVLPPLL	-0.30036	0.060081	-0.042751	0.072393	-0.163171	0.129183		-0.091717	0.106685	-0.034625	0.100765	-0.124456	0.1098		144
145	636-643	YSTGSNVF	7	2.00954	0.083902	2.13503	0.076176	2.25748	0.05372		0.413947	0.084599	n.a.	n.a.	n.a.	n.a.		-0.008109	0.111877	-0.014651	0.076784	0.351179	0.079543		0.112991	0.104098	0.244718	0.15327	0.151129	0.079646		145	859-866	TVLPPLLT	-0.430893	0.117313	-0.108098	0.077455	-0.248654	0.119701		-0.021808	0.09153	0.042209	0.041232	-0.099295	0.063444		145
146	642-650	VFQTRAGCL	8	2.50013	0.110709	2.74137	0.163427	2.90462	0.195726		0.067922	0.242741	-0.144583	0.167825	-0.227321	0.215		-0.000114	0.193843	-0.083791	0.167549	0.385229	0.205295		0.010848	0.140857	-0.482315	0.171455	0.246882	0.205551		146	870-877	IAQYTSAL	-0.644321	0.163873	-0.259746	0.068032	-0.197239	0.154159		-0.184838	0.189407	0.055997	0.068224	-0.066124	0.115306		146
147	643-650	FQTRAGCL	7	1.99912	0.13233	2.34572	0.179923	2.57241	0.307461		n.a.	n.a.	n.a.	n.a.	n.a.	n.a.		-0.022424	0.132921	0.146642	0.180359	0.227976	0.34556		0.457651	0.132716	0.134166	0.189519	0.15834	0.311883		147	878-885	LAGTITSG	-0.696149	0.124506	-0.344288	0.058748	-0.137635	0.153024		n.a.	n.a.	-0.012708	0.093387	-0.174213	0.150733		147
148	644-650	QTRAGCL	6	1.92067	0.071369	2.07544	0.090743	2.21902	0.161632		0.226123	0.104908	0.183878	0.094551	0.144642	0.300023		0.324378	0.071497	0.051099	0.10097	0.205295	0.172258		0.230126	0.072379	-0.043822	0.218127	0.129935	0.178292		148	878-891	LAGTITSGWTFGAG	-3.23084	0.267178	-1.23681	0.128171	-1.57717	0.262035		-0.719685	0.272297	-0.480772	0.10566	-0.572103	0.28906		148
149	662-671	CDIPIGAGIC	8	2.49244	0.129411	3.09044	0.162301	3.28291	0.135857		0.494686	0.238643	0.295584	0.192056	0.0775	0.213153		0.646661	0.16549	0.464884	0.164437	0.388465	0.147354		0.575058	0.159518	0.047881	0.235816	0.363851	0.141938		149	878-893	LAGTITSGWTFGAGAA	-1.234	0.27512	-0.141471	0.163022	-0.350363	0.323105		-0.302965	0.273969	0.428465	0.061421	-0.10085	0.324342		149
150	664-671	IPIGAGIC	6	2.24578	0.102642	2.59784	0.115493	2.74646	0.106932		0.485154	0.130221	0.529677	0.138472	0.359218	0.146331		0.485854	0.110325	0.168116	0.122141	0.275595	0.113907		0.425872	0.119894	0.125551	0.213271	0.198287	0.115153		150	886-898	WTFGAGAALQIPF	-0.039118	0.110991	-0.090448	0.133461	0.091708	0.071335		0.342189	0.138169	0.481543	0.150689	0.237598	0.072468		150
151	664-673	IPIGAGICAS	8	4.11707	0.119292	4.87358	0.128059	5.1988	0.129702		-0.139243	0.250191	-0.825071	0.146297	-0.075778	0.129783		0.559719	0.224227	0.157224	0.184865	0.100965	0.192527		0.744285	0.168871	-0.003346	0.170743	-0.017891	0.275907		151	889-898	GAGAALQIPF	-1.18766	0.126532	-0.938996	0.08458	-1.12054	0.177959		-0.939542	0.125686	-0.745939	0.085736	-0.832403	0.145099		151
152	665-671	PIGAGIC	5	1.46013	0.060633	1.76131	0.077581	1.89203	0.075342		0.257114	0.106448	0.155343	0.12604	0.120662	0.083341		0.336031	0.089942	0.197314	0.077861	0.163807	0.090897		0.304441	0.074347	-0.284878	0.081697	0.14459	0.086135		152	892-899	AALQIPFA	-0.621328	0.16959	-0.012627	0.199025	-0.333996	0.087472		n.a.	n.a.	0.163999	0.121547	-0.042715	0.133127		152
153	672-690	ASYQTQTNSPGSASSVASQ	17	7.58076	0.140056	6.94358	0.316533	7.4253	0.326031		-0.301969	0.671795	0.120413	0.316568	0.009858	0.338586		-0.675677	0.244896	0.138789	0.342872	0.606916	0.375585		-0.222705	0.199059	-0.18073	0.444852	0.369636	0.351152		153	892-901	AALQIPFAMQ	-0.314299	0.216743	-0.271045	0.147151	-0.480353	0.168487		-0.463786	0.068256	-0.097609	0.18775	-0.204027	0.175677		153
154	672-692	ASYQTQTNSPGSASSVASQSI	19	9.10639	0.012996	8.00309	0.154591	8.90221	0.333199		-2.52607	0.118871	-1.61043	0.166834	-1.90271	0.429674		-1.642	0.01838	0.428059	0.417517	0.762011	0.401428		-0.41997	0.104349	n.a.	n.a.	-0.024106	0.385819		154	894-901	LQIPFAMQ	-0.62958	0.201992	-0.190744	0.189107	-0.026649	0.134681		-0.022769	0.168687	0.190541	0.120808	-0.035332	0.091987		154
155	672-694	ASYQTQTNSPGSASSVASQSIIA	21	9.57507	0.212199	9.81965	0.350137	10.2788	0.473946		-4.09149	0.212199	-4.58341	0.350137	-3.8663	0.473946		-0.871656	0.213959	-0.103485	0.411367	0.944772	0.474736		0.381823	0.256197	n.a.	n.a.	0.165919	0.492794		155	902-916	MAYRFNGIGVTQNVL	-2.29153	0.436634	-0.541888	0.291075	-0.998726	0.240854		-0.910256	0.358117	0.004726	0.166594	-0.195714	0.243245		155
156	674-690	YQTQTNSPGSASSVASQ	15	5.68579	0.247299	5.28218	0.253326	5.70305	0.146253		0.080757	0.28306	0.335935	0.253355	0.251142	0.14757		-0.335872	0.36549	0.246452	0.26963	0.598567	0.276325		0.028955	0.262748	-0.175164	0.58758	0.33775	0.201719		156	903-916	AYRFNGIGVTQNVL	-2.24974	0.258619	-0.627947	0.259662	-0.60887	0.350344		-1.21791	0.299179	0.071431	0.220767	-0.258042	0.331995		156
157	675-690	QTQTNSPGSASSVASQ	14	4.96481	0.160278	4.65076	0.270721	4.80958	0.14102		0.401285	0.194568	0.600204	0.293259	0.566099	0.167231		-0.153053	0.269139	0.261155	0.272269	0.293176	0.371264		0.024735	0.172942	-0.470452	0.625096	0.363077	0.161652		157	904-916	YRFNGIGVTQNVL	-2.18278	0.385177	-0.605614	0.155551	-0.793358	0.42477		n.a.	n.a.	n.a.	n.a.	n.a.	n.a.		157
158	693-699	IAYTMSL	6	3.32744	0.058916	3.50022	0.027983	3.71851	0.03936		-0.078848	0.118474	-0.219413	0.101657	-0.110463	0.046235		0.272034	0.101575	0.171518	0.037907	0.113973	0.053842		0.334441	0.059956	0.115955	0.029922	0.012105	0.041235		158	907-916	NGIGVTQNVL	-1.42298	0.273753	-0.193907	0.117734	-0.257054	0.17377		-0.710597	0.246998	0.253719	0.082241	-0.031612	0.164788		158
159	695-702	YTMSLGAE	7	3.26857	0.024356	2.97921	0.083578	3.04248	0.108446		n.a.	n.a.	n.a.	n.a.	n.a.	n.a.		-0.099729	0.137863	-0.0582	0.109406	0.32991	0.162712		-0.105923	0.038856	-0.080148	0.234056	0.155494	0.134239		159	909-916	IGVTQNVL	-1.10964	0.171403	-0.143827	0.064216	-0.347442	0.150236		-0.476585	0.268688	0.056728	0.045238	0.003642	0.092298		159
160	696-704	TMSLGAENS	8	3.25552	0.064013	2.87806	0.129647	3.11832	0.125871		n.a.	n.a.	n.a.	n.a.	n.a.	n.a.		-0.092973	0.079309	0.105352	0.294284	0.187551	0.191974		-0.225992	0.251206	n.a.	n.a.	0.148787	0.168942		160	917-924	YENQKLIA	-0.326357	0.120155	-0.025649	0.283069	0.017934	0.148872		-0.613116	0.137746	0.161268	0.185704	0.027369	0.147708		160
161	700-706	GAENSVA	6	2.23279	0.081043	2.01161	0.073734	2.13209	0.090858		0.037202	0.253204	0.239424	0.077124	0.164466	0.09773		-0.07939	0.164907	0.117965	0.081547	0.156337	0.110062		-0.023901	0.092925	-0.158748	0.073854	0.030967	0.092314		161	923-938	IANQFNSAIGKIQDSL	-1.01906	0.28867	-0.522545	0.228259	-0.797268	0.364529		0.167678	0.265646	0.122343	0.198361	-0.106613	0.216482		161
162	715-730	PTNFTISVTTEILPVS	13	2.18136	0.090175	3.27016	0.137683	4.13114	0.176561		0.159764	0.17103	0.566207	0.137813	0.685078	0.192024		-0.213413	0.169526	-0.217466	0.155863	0.428878	0.223472		0.149392	0.174086	-0.451802	0.152006	0.203814	0.22483		162	927-945	FNSAIGKIQDSLSSTASAL	-1.33029	0.288623	-0.902439	0.247365	-0.95586	0.202651		-0.247252	0.23371	n.a.	n.a.	-0.304223	0.294881		162
163	724-731	TEILPVSM	6	0.70549	0.071452	0.795138	0.077269	1.60129	0.09589		-0.036931	0.082056	0.116846	0.079341	0.257076	0.096358		0.056949	0.10195	0.168387	0.10799	0.423551	0.12218		-0.028855	0.108793	0.058284	0.114988	0.260013	0.127957		163	928-938	NSAIGKIQDSL	-0.356525	0.070911	0.212583	0.084667	-0.218883	0.10607		0.72689	0.063274	0.554145	0.048808	0.311909	0.191985		163
164	725-731	EILPVSM	5	0.31151	0.043329	0.36429	0.037747	1.11817	0.057835		-0.093652	0.056552	0.133269	0.039141	0.289174	0.06396		0.017568	0.055216	0.140207	0.047078	0.346255	0.074202		-0.083764	0.051631	-0.257948	0.039672	0.220245	0.060872		164	928-945	NSAIGKIQDSLSSTASAL	-1.07847	0.382528	-0.14839	0.120812	0.033185	0.253428		0.900064	0.345498	0.739147	0.167816	0.563069	0.201405		164
165	732-739	TKTSVDCT	7	1.91394	0.219203	2.31091	0.109148	2.63288	0.179269		0.133011	0.267832	0.202273	0.124653	0.290441	0.26119		0.078644	0.25561	0.143832	0.193366	0.22134	0.237723		0.148638	0.259167	0.16193	0.14218	0.16189	0.271965		165	937-945	SLSSTASAL	-0.753709	0.122564	0.103242	0.123684	-0.132062	0.131074		-0.163331	0.122942	0.317499	0.124059	0.230326	0.131428		165
166	740-748	MYICGDSTE	8	2.38119	0.097689	2.87794	0.184273	3.14235	0.180174		n.a.	n.a.	n.a.	n.a.	n.a.	n.a.		-0.053131	0.184337	-0.076283	0.186187	0.234828	0.186573		-0.177715	0.101778	n.a.	n.a.	0.184385	0.238339		166	939-956	SSTASALGKLQDVVNQNA	-1.41645	0.249773	-0.273972	0.21954	-0.674883	0.30417		-0.141544	0.350874	0.651884	0.161813	0.080101	0.304754		166
167	741-748	YICGDSTE	7	1.28178	0.003523	1.21138	0.21548	1.22144	0.133026		0.037646	0.166208	n.a.	n.a.	n.a.	n.a.		-0.178953	0.164459	-0.085019	0.234235	0.282891	0.144913		-0.165313	0.053256	-0.267856	0.228607	0.236384	0.148967		167	939-961	SSTASALGKLQDVVNQNAQALNT	-1.63795	0.496999	-0.397425	0.258871	-1.11341	0.258808		0.688125	0.510674	0.96661	0.295528	-0.212669	0.257734		167
168	753-759	LLQYGSF	6	1.99396	0.054518	1.92287	0.077851	2.03513	0.096035		0.059607	0.160604	-0.013502	0.081727	0.007309	0.098537		0.020188	0.079387	0.133969	0.080926	0.262111	0.101461		0.03322	0.075517	0.086602	0.184035	0.159177	0.104674		168	946-961	GKLQDVVNQNAQALNT	-1.11241	0.395712	-0.079593	0.22391	-0.634911	0.21971		0.792333	0.30345	0.573892	0.233812	0.257624	0.224701		168
169	763-769	LNRALTG	6	1.29448	0.11974	2.14697	0.077266	2.8346	0.16514		0.458125	0.139879	0.339146	0.077444	0.411598	0.177089		0.204107	0.160488	0.174962	0.12087	0.24487	0.190316		0.323975	0.140106	0.269609	0.193546	0.147323	0.194701		169	951-959	VVNQNAQAL	-2.12872	0.169761	-0.847659	0.140016	-0.674031	0.196878		-1.05842	0.190608	-0.253329	0.203182	-0.160176	0.049676		169
170	764-771	NRALTGIA	7	1.13449	0.088	2.0995	0.087898	3.02	0.136433		0.071145	0.128316	0.251502	0.123336	0.190561	0.153092		0.120969	0.110175	0.245806	0.120914	0.350176	0.152137		0.107478	0.108242	0.20635	0.2298	0.26624	0.148032		170	962-970	LVKQLSSNF	-0.231623	0.155042	0.538249	0.123719	0.371765	0.169824		0.633451	0.113542	0.871977	0.070251	0.624272	0.120189		170
171	770-782	IAVEQDKNTQEVF	12	1.15065	0.093568	2.17315	0.180145	4.04156	0.21666		-0.350667	0.25116	-0.151008	0.26787	0.108529	0.236312		-0.102218	0.130324	0.235104	0.227513	0.712212	0.234885		-0.175764	0.126691	0.299054	0.314467	0.403573	0.246758		171	962-977	LVKQLSSNFGAISSVL	-1.00396	0.365973	0.040217	0.117704	-0.09421	0.542301		0.406984	0.243406	0.84334	0.219174	0.456513	0.340056		171
172	774-782	QDKNTQEVF	8	0.648184	0.032123	1.16752	0.070909	2.48421	0.155516		0.201518	0.032275	0.523227	0.070978	0.010669	0.160865		0.042496	0.032275	0.249152	0.149957	0.411327	0.168188		0.008911	0.044822	0.118494	0.070926	0.335562	0.156499		172	970-977	FGAISSVL	-0.531218	0.092146	0.028662	0.086698	-0.164362	0.116795		0.061844	0.085354	0.161961	0.089965	-0.087216	0.118165		172
173	781-802	VFAQVKQIYKTPPIKDFGGFNF	19	2.88725	0.224115	3.54113	0.19894	3.99937	0.175563		0.436398	0.435461	0.390023	0.278482	0.47926	0.221785		n.a.	n.a.	0.197497	0.316935	0.45342	0.240558		-0.234121	0.359159	0.312687	0.207718	0.294322	0.292736		173	971-977	GAISSVL	-0.433563	0.078454	0.137059	0.096921	-0.039565	0.130955		0.142172	0.089711	0.287717	0.071202	0.07584	0.110638		173
174	783-796	AQVKQIYKTPPIKD	11	5.37777	0.219735	5.05752	0.188386	5.29077	0.206266		-0.295759	0.239253	0.412702	0.198465	0.17603	0.215163		-0.000505	0.332468	0.328818	0.214059	0.361037	0.271315		0.124907	0.244658	-0.055783	0.291034	0.186227	0.239821		174	980-990	ILSRLDPPEAE	-0.684223	0.100004	-0.176015	0.053456	-0.283588	0.144661		0.189416	0.124163	0.273462	0.087314	0.339071	0.160253		174
175	784-796	QVKQIYKTPPIKD	10	4.90024	0.090533	4.77874	0.129153	5.01084	0.306582		n.a.	n.a.	n.a.	n.a.	n.a.	n.a.		0.146282	0.227134	0.316599	0.150816	0.067467	0.313375		0.080361	0.095743	0.182773	0.129863	0.35375	0.315317		175	982-989	SRLDPPEA	-0.605901	0.072926	-0.262528	0.076702	-0.271763	0.104734		-0.141389	0.175211	0.02267	0.093624	-0.191773	0.142562		175
176	800-815	FNFSQILPDPSKPSKR	12	3.27847	0.068384	3.48673	0.160038	3.5439	0.080015		-0.401231	0.391385	-0.391722	0.177138	0.080386	0.271549		0.183453	0.173811	0.205979	0.166401	0.970247	0.154177		-0.149071	0.070541	0.207122	0.160327	0.695752	0.098778		176	993-1001	IDRLITGRL	-0.468862	0.258772	-0.006799	0.135303	-0.00103	0.179659		0.518134	0.207262	0.313421	0.096502	0.175558	0.182954		176
177	821-828	LLFNKVTL	7	2.41393	0.044008	2.54736	0.073655	2.86933	0.00696		n.a.	n.a.	n.a.	n.a.	n.a.	n.a.		-0.065528	0.101004	-0.1054	0.082518	0.183257	0.056423		-0.028886	0.057225	0.074267	0.089146	0.110809	0.023707		177	994-1001	DRLITGRL	-0.656704	0.051453	-0.19753	0.135057	-0.35743	0.162623		0.188242	0.036944	0.210772	0.134666	0.379283	0.155365		177
178	822-828	LFNKVTL	6	2.43895	0.149996	2.22768	0.053337	2.36597	0.159413		0.059659	0.17206	0.193059	0.068646	-0.022247	0.164936		-0.210934	0.156875	0.23211	0.136192	0.238792	0.160328		-0.096909	0.155206	0.137481	0.220268	0.188014	0.164154		178	1016-1024	AEIRASANL	-1.44093	0.142536	-0.985483	0.087937	-0.90661	0.098514		n.a.	n.a.	-0.793371	0.041808	-0.747042	0.072826		178
179	822-833	LFNKVTLADAGF	11	4.33851	0.09951	3.86848	0.133846	4.00184	0.214929		0.201282	0.125657	0.689777	0.140992	0.611849	0.245135		-0.072869	0.208563	0.331709	0.353334	0.701303	0.234906		n.a.	n.a.	0.332599	0.141836	0.505697	0.220248		179	1018-1024	IRASANL	0.439456	0.172141	-0.026555	0.043417	-0.561176	0.059594		n.a.	n.a.	n.a.	n.a.	n.a.	n.a.		179
180	823-833	FNKVTLADAGF	10	4.10864	0.219249	3.72022	0.240704	3.89062	0.300269		-0.140936	0.249654	0.275529	0.25449	0.152502	0.306721		-0.433192	0.307039	-0.017614	0.249574	0.281031	0.309943		-0.153939	0.328945	-0.40721	0.295716	0.42504	0.346565		180	1032-1042	CVLGQSKRVDF	-0.898121	0.18584	-0.448096	0.282715	-0.493367	0.259403		-0.33169	0.124255	-0.207084	0.25419	-0.350752	0.242569		180
181	824-833	NKVTLADAGF	9	3.86694	0.106393	3.65005	0.137939	3.8097	0.196376		-0.407261	0.426721	0.117281	0.174141	-0.323665	0.551782		-0.290124	0.107172	0.221842	0.139526	0.395096	0.21628		-0.092192	0.198427	0.004654	0.141503	0.155766	0.264994		181	1032-1046	CVLGQSKRVDFCGKG	-0.7718	0.301676	-0.358689	0.215955	-0.197076	0.228622		0.134384	0.313046	0.222934	0.207042	0.231147	0.199702		181
182	833-841	FIKQYGDCL	8	2.85026	0.113084	2.65661	0.091786	2.84818	0.156337		-0.512076	0.28005	-0.304007	0.11072	-0.301079	0.168153		-0.052216	0.320607	0.174057	0.144256	0.169054	0.197938		0.011596	0.145509	-0.31406	0.095035	0.175741	0.200517		182	1034-1042	LGQSKRVDF	-0.675688	0.202887	-0.539402	0.308304	-0.397862	0.20023		-0.186153	0.176844	-0.205862	0.231032	-0.247156	0.200977		182
183	834-840	IKQYGDC	6	1.95964	0.075805	1.78297	0.186661	1.7693	0.131275		-0.217472	0.151874	0.366759	0.195212	0.267464	0.167352		-0.066404	0.132988	-0.058693	0.188861	0.213901	0.161797		-0.018774	0.154257	-0.274464	0.186828	0.199488	0.143377		183	1034-1049	LGQSKRVDFCGKGYHL	-0.968446	0.183394	-0.800031	0.28236	-1.28817	0.384835		-0.275649	0.225868	-0.315789	0.217947	-0.561808	0.340422		183
184	834-841	IKQYGDCL	7	2.35571	0.041649	2.15127	0.104843	2.25435	0.119839		-0.150343	0.197541	0.234365	0.104912	0.015417	0.14355		n.a.	n.a.	-0.014629	0.113099	0.299734	0.123349		-0.030839	0.100781	-0.194625	0.111022	0.158914	0.128018		184	1043-1049	CGKGYHL	-0.340467	0.078269	-0.247033	0.079153	-0.254213	0.086592		-0.335615	0.0863	0.033071	0.102071	0.290566	0.111262		184
185	834-848	IKQYGDCLGDIAARD	14	5.63852	0.145324	5.37449	0.052576	5.70324	0.148722		n.a.	n.a.	n.a.	n.a.	n.a.	n.a.		-0.311933	0.174457	0.339363	0.061773	0.25581	0.187185		-0.148641	0.154846	0.197083	0.137729	0.082497	0.158851		185	1053-1063	PQSAPHGVVFL	-0.189147	0.030267	-0.17403	0.043261	-0.505465	0.042226		-0.219781	0.041581	-0.210293	0.0457	-0.307426	0.141638		185
186	842-848	GDIAARD	6	2.69487	0.082531	2.42708	0.097894	2.51752	0.125996		-0.360951	0.310942	-0.362056	0.155299	-0.498087	0.134482		-0.021771	0.133587	0.203848	0.10685	0.193713	0.143889		-0.075112	0.088595	0.137021	0.120398	0.115942	0.139173		186	1103-1116	FVTQRNFYEPQIIT	-0.920154	0.308666	-1.22252	0.062049	-1.40034	0.33232		-0.176008	0.140689	-0.611319	0.057072	-0.920903	0.248001		186
187	852-858	AQKFNGL	6	1.52337	0.059849	1.56257	0.037745	1.731	0.090297		0.264376	0.213389	0.457691	0.045299	0.450552	0.149026		0.152954	0.083655	0.231866	0.093052	0.232489	0.125171		0.09111	0.062461	0.075776	0.041351	0.222468	0.102066		187	1103-1117	FVTQRNFYEPQIITT	-0.998265	0.143547	-1.02609	0.206365	-0.962268	0.299753		-0.476973	0.134604	-0.696188	0.130863	-0.415415	0.235287		187
188	858-865	LTVLPPLL	5	1.7607	0.088826	1.78536	0.060397	2.3889	0.077665		-0.026827	0.159023	0.106709	0.082444	0.104725	0.105846		0.075277	0.119856	0.230458	0.086918	0.164438	0.108226		0.028823	0.103276	0.086639	0.179445	0.105301	0.090935		188	1109-1117	FYEPQIITT	-0.397932	0.13162	-0.484555	0.13715	-0.723004	0.154042		-0.076461	0.149467	-0.290983	0.078709	-0.530839	0.13534		188
189	858-866	LTVLPPLLT	6	2.57077	0.101978	2.60252	0.032188	3.28289	0.069213		0.04792	0.145184	0.146888	0.170536	0.114475	0.079505		0.162388	0.13735	0.270402	0.088014	0.233254	0.081608		0.109507	0.111168	0.032578	0.041538	0.171511	0.07816		189	1110-1117	YEPQIITT	-0.755072	0.085563	-0.54904	0.108151	-0.467424	0.173435		-0.419855	0.084851	-0.227139	0.10187	-0.242686	0.188379		189
190	859-865	TVLPPLL	4	1.26486	0.033747	1.28129	0.026804	1.81188	0.042571		0.019296	0.099562	0.130083	0.036689	0.13484	0.046506		0.105477	0.070088	0.203669	0.041226	0.117083	0.056564		-0.057071	0.073134	0.092007	0.074167	0.015957	0.077755		190	1121-1127	FVSGNCD	n.a.	n.a.	n.a.	n.a.	n.a.	n.a.		n.a.	n.a.	0.316387	0.174162	0.239961	0.203177		190
191	859-866	TVLPPLLT	5	1.89342	0.083695	1.93943	0.026122	2.51895	0.050355		0.029695	0.180656	0.139141	0.097683	0.136497	0.096133		0.126286	0.114097	0.194013	0.051478	0.159162	0.053804		0.045801	0.087448	0.062269	0.152803	0.085007	0.058727		191	1148-1169	FKEELDKYFKNHTSPDVDLGDI	-1.62356	0.234831	-0.002447	0.191976	-0.673823	0.336195		-1.00278	0.259568	-0.302916	0.192902	0.156784	0.335481		191
192	870-877	IAQYTSAL	7	1.54528	0.156515	2.65413	0.047335	2.85873	0.107428		0.420835	0.257752	0.090691	0.176737	0.015136	0.153877		0.25392	0.159744	n.a.	n.a.	0.260186	0.107921		0.273413	0.168074	0.027868	0.099406	0.15701	0.110589		192	1175-1186	SVVNIQKEIDRL	-1.18334	0.14832	0.125287	0.133185	-0.413796	0.095894		-1.2514	0.148732	-1.06065	0.056068	-1.47482	0.150638		192
193	877-886	LLAGTITSGW	9	2.48938	0.136819	2.36638	0.102954	2.51167	0.195072		n.a.	n.a.	n.a.	n.a.	n.a.	n.a.		0.25745	0.148055	0.396864	0.160438	0.277295	0.20206		0.295643	0.161657	0.465648	0.103167	0.172201	0.210635		193	1175-1188	SVVNIQKEIDRLNE	-1.11179	0.139081	-0.07534	0.152185	-0.162706	0.160236		n.a.	n.a.	n.a.	n.a.	n.a.	n.a.		193
194	878-885	LAGTITSG	7	3.18119	0.084859	2.91858	0.058396	3.09442	0.147406		0.15755	0.247852	0.32417	0.091953	0.171301	0.153769		-0.003894	0.217588	0.178079	0.071087	0.233932	0.160072		0.030097	0.095463	0.071341	0.14247	0.155551	0.156238		194	1177-1188	VNIQKEIDRLNE	-0.449274	0.133121	-0.00942	0.142002	0.016291	0.21049		-0.316516	0.134665	-0.168973	0.143449	-0.532607	0.21147		194
195	878-891	LAGTITSGWTFGAG	13	6.82445	0.210288	6.50101	0.103373	6.82838	0.250839		0.101657	0.350734	-0.030255	0.252971	-0.260289	0.28554		-0.092204	0.313867	-0.188738	0.119177	0.225715	0.251014		0.237544	0.22479	0.306366	0.10538	0.101545	0.262202		195	1187-1197	NEVAKNLNESL	-0.537924	0.13577	-0.540597	0.136456	-0.660989	0.11963		-0.204744	0.122553	-0.203067	0.131442	-0.420549	0.176534		195
196	878-893	LAGTITSGWTFGAGAA	15	6.61854	0.063736	5.73556	0.055167	6.1306	0.321917		-0.109004	0.326506	0.32983	0.243974	-0.165922	0.327654		-0.269597	0.488495	0.167184	0.0784	0.239722	0.331827		-0.176147	0.071691	0.21055	0.542024	0.014437	0.322207		196	1214-1233	WSHPQFEKGGGSGGGSGGSA	-1.77702	0.241866	-0.426627	0.436175	0.565156	0.480009		-1.18951	0.152283	0.247273	0.567018	0.052226	0.343635		196
197	886-898	WTFGAGAALQIPF	11	0.827703	0.110651	1.44344	0.073138	1.99066	0.070939		0.36552	0.228023	-0.182809	0.18059	-0.285554	0.216548		0.288847	0.148677	0.054974	0.081858	0.318845	0.072305		0.456081	0.119488	-0.114823	0.075134	0.121105	0.080029																			197
198	889-898	GAGAALQIPF	8	1.69368	0.125022	2.65517	0.083113	4.14388	0.136335		0.292382	0.226141	0.531583	0.182662	0.655954	0.165858		0.257443	0.199815	0.255013	0.138272	0.392347	0.172934		0.3408	0.147767	0.241497	0.111645	0.166112	0.167883																			198
199	892-899	AALQIPFA	6	3.03084	0.111839	2.92431	0.089953	3.05507	0.080856		0.070718	0.256332	0.179182	0.130464	0.252091	0.097629		0.168126	0.15643	0.261114	0.125233	0.244307	0.10161		0.110432	0.124508	n.a.	n.a.	0.154535	0.097678																			199
200	892-901	AALQIPFAMQ	8	3.59748	0.065431	3.54142	0.147082	3.82299	0.156079		0.317958	0.101692	0.15954	0.179629	0.140813	0.156416		0.157676	0.126324	0.362048	0.155876	0.119929	0.165004		-0.004277	0.09518	-0.279695	0.147835	0.052411	0.17397																			200
201	892-902	AALQIPFAMQM	9	4.28943	0.104666	4.34786	0.057309	4.64643	0.18765		0.31022	0.190655	0.029665	0.070341	0.238148	0.200002		0.161625	0.209331	0.281044	0.081662	0.232503	0.210261		0.211314	0.126248	0.496184	0.057561	0.163085	0.206299																			201
202	894-901	LQIPFAMQ	6	2.59122	0.144599	2.62572	0.068043	2.78788	0.090615		0.198191	0.20005	0.106155	0.092283	0.185663	0.092115		0.207083	0.182141	0.264851	0.072601	0.222678	0.111735		0.188761	0.151381	0.270926	0.068734	0.147335	0.095939																			202
203	894-902	LQIPFAMQM	7	2.54681	0.116801	2.75053	0.079662	2.92019	0.06527		0.222723	0.219348	-0.14302	0.145848	-0.009684	0.084123		0.155219	0.171218	0.092488	0.134127	0.063172	0.127921		-0.049519	0.121852	n.a.	n.a.	0.007331	0.120215		*n.a., values not available																	203
204	902-916	MAYRFNGIGVTQNVL	14	5.87092	0.350373	7.29978	0.122811	7.73225	0.214183		1.65726	0.47906	0.42084	0.196553	0.219367	0.221086		1.03803	0.372626	0.214181	0.351358	0.445658	0.239453		0.477848	0.600325	0.150211	0.398994	0.292878	0.254689		MEA, maximum exchangeable amides for the peptide																	204
205	903-916	AYRFNGIGVTQNVL	13	4.95376	0.223572	5.86302	0.164866	6.21394	0.313684		0.975837	0.4423	0.497765	0.181234	0.273109	0.31639		0.534517	0.311044	0.236504	0.18836	0.504257	0.352666		0.91328	0.26783	0.62985	0.355963	0.356524	0.33295																			205
206	904-916	YRFNGIGVTQNVL	12	5.04159	0.35992	5.78765	0.111203	6.20224	0.289107		n.a.	n.a.	n.a.	n.a.	n.a.	n.a.		0.455299	0.361082	0.149212	0.162953	0.356022	0.330032		0.761492	0.384244	0.558553	0.227365	0.260905	0.328646																			206
207	905-916	RFNGIGVTQNVL	11	4.41248	0.143113	5.12781	0.10642	5.39023	0.157793		-0.120503	0.431284	-0.688765	0.165173	-0.368272	0.159144		0.087079	0.215937	0.319951	0.221633	0.258343	0.25748		0.613656	0.241712	0.943052	0.133714	0.302733	0.198761																			207
208	907-916	NGIGVTQNVL	9	3.84359	0.246283	4.49311	0.077995	4.78883	0.158219		0.961621	0.451586	0.365749	0.107427	0.345038	0.260449		0.626653	0.288685	0.338878	0.103702	0.329081	0.194512		0.840074	0.251943	0.069407	0.078814	0.255503	0.163887																			208
209	909-916	IGVTQNVL	7	2.76302	0.140865	3.4597	0.03744	3.54566	0.092279		0.737226	0.194238	0.240768	0.28706	0.251979	0.094545		0.696392	0.160524	0.302757	0.100626	0.273696	0.099588		0.765248	0.149041	0.118804	0.172901	0.283111	0.11293																			209
210	917-924	YENQKLIA	7	1.98132	0.118403	2.68043	0.164566	2.87392	0.144831		0.425795	0.125388	n.a.	n.a.	0.380243	0.145976		0.128841	0.135292	0.290663	0.200671	0.23694	0.150306		0.161646	0.190803	0.055584	0.204615	0.268115	0.162608																			210
211	923-938	IANQFNSAIGKIQDSL	15	4.67267	0.246322	5.65861	0.171152	7.3567	0.182583		n.a.	n.a.	n.a.	n.a.	n.a.	n.a.		-0.30859	0.269893	0.330914	0.224614	0.215771	0.251206		-0.056741	0.24734	0.556608	0.201205	0.029317	0.245558																			211
212	927-945	FNSAIGKIQDSLSSTASAL	18	7.81581	0.232674	8.54642	0.247253	9.71788	0.202514		0.960314	0.381582	1.11284	0.247365	0.593905	0.452274		0.517394	0.232793	0.03832	0.476966	0.137039	0.305036		0.795048	0.261285	1.29173	0.248632	0.468009	0.204196																			212
213	928-936	NSAIGKIQD	8	2.43587	0.125341	2.68216	0.023414	3.60471	0.167572		n.a.	n.a.	n.a.	n.a.	n.a.	n.a.		0.957405	0.151307	1.31183	0.079387	0.79465	0.17746		0.900589	0.133702	0.888887	0.024563	0.749028	0.169982																			213
214	928-938	NSAIGKIQDSL	10	3.51041	0.056453	3.78622	0.019204	4.51971	0.105721		0.512051	0.144236	0.531166	0.113875	0.846367	0.117539		0.370263	0.137368	0.417339	0.103254	0.646523	0.154555		0.532842	0.058362	0.363919	0.020555	0.322842	0.124864																			214
215	928-945	NSAIGKIQDSLSSTASAL	17	7.60879	0.282649	7.76769	0.119501	8.58231	0.16138		0.856953	0.299795	0.343058	0.234408	1.14301	0.2166		0.055102	0.314936	0.104972	0.221739	0.758428	0.276056		0.401921	0.285973	0.42851	0.225808	0.124097	0.190251																			215
216	937-945	SLSSTASAL	8	3.13578	0.122527	2.68299	0.123647	2.93244	0.131039		-0.063242	0.143659	0.312452	0.16466	0.780847	0.147749		-0.038532	0.243147	0.418458	0.15464	0.2541	0.215621		0.225355	0.13111	0.442456	0.137509	0.021339	0.138421																			216
217	939-956	SSTASALGKLQDVVNQNA	17	8.11956	0.247683	8.47111	0.157441	9.19796	0.302456		n.a.	n.a.	n.a.	n.a.	0.494943	0.30417		0.455959	0.256038	0.945325	0.162816	0.553366	0.357847		0.703777	0.251678	0.919168	0.163655	0.381956	0.305736																			217
218	939-961	SSTASALGKLQDVVNQNAQALNT	22	11.4716	0.45904	11.8776	0.226752	13.1206	0.238246		n.a.	n.a.	n.a.	n.a.	n.a.	n.a.		0.70855	0.675939	1.33874	0.406506	0.247605	0.458077		1.36557	0.461762	0.776939	0.546944	-0.162721	0.275974																			218
219	946-961	GKLQDVVNQNAQALNT	15	7.76456	0.269179	8.20888	0.217728	8.86127	0.213419		0.78749	0.442972	0.76367	0.242585	0.66702	0.385024		0.638488	0.316928	0.579734	0.260964	0.405038	0.365212		0.692893	0.284164	0.525837	0.28272	0.010942	0.247618																			219
220	951-959	VVNQNAQAL	8	3.515	0.169411	3.42578	0.012736	3.42771	0.049571		n.a.	n.a.	n.a.	n.a.	n.a.	n.a.		0.151078	0.189441	0.068678	0.013208	0.355019	0.154912		0.174587	0.169674	n.a.	n.a.	0.450035	0.172408																			220
221	951-962	VVNQNAQALNTL	11	3.47411	0.174147	4.17901	0.301065	3.88605	0.043005		1.11234	0.220795	0.653204	0.305114	1.08234	0.06991		0.951483	0.19021	0.421677	0.37113	1.13957	0.090208		0.637285	0.175249	0.60748	0.321579	1.1797	0.071245																			221
222	962-969	LVKQLSSN	7	2.45289	0.03744	2.24029	0.103677	2.30347	0.071915		1.29216	0.065789	2.02213	0.106694	2.29028	0.084669		0.452594	0.085173	1.31151	0.107659	1.22313	0.105971		0.448459	0.052799	1.38286	0.104735	1.74695	0.10447																			222
223	962-970	LVKQLSSNF	8	2.63397	0.093588	2.33053	0.06627	2.55156	0.118854		0.080323	0.184222	0.225017	0.08344	0.381494	0.119679		0.129486	0.137807	0.476576	0.067313	0.294232	0.135768		0.223013	0.101962	0.414778	0.150048	0.183548	0.120767																			223
224	962-974	LVKQLSSNFGAIS	12	5.14987	0.161337	4.89914	0.170048	5.18747	0.23907		n.a.	n.a.	n.a.	n.a.	n.a.	n.a.		0.236981	0.260931	0.752243	0.177659	0.476001	0.275456		0.545725	0.185885	0.537043	0.238609	0.483052	0.280761																			224
225	962-977	LVKQLSSNFGAISSVL	15	7.04341	0.227541	6.58275	0.102811	7.03549	0.272577		0.330181	0.325663	0.449408	0.199134	0.32453	0.288401		0.198423	0.271141	0.98506	0.10622	0.628735	0.331354		-0.233872	0.551053	1.21511	0.107023	0.279552	0.343788																			225
226	963-970	VKQLSSNF	7	2.33079	0.046448	1.90887	0.110338	2.04375	0.143275		-0.150625	0.139364	0.595427	0.110688	0.379923	0.153352		0.161479	0.082778	0.514532	0.110733	0.460748	0.151842		0.030109	0.087746	0.095517	0.110383	0.371514	0.144061																			226
227	970-977	FGAISSVL	7	2.83159	0.065468	2.70483	0.085137	2.87659	0.107152		0.22792	0.110491	0.103262	0.091509	0.071093	0.109756		0.205819	0.070016	0.44668	0.088862	0.31897	0.140058		0.196574	0.081707	0.353398	0.115284	0.154923	0.107676																			227
228	971-977	GAISSVL	6	2.40915	0.068109	2.22795	0.065081	2.39708	0.099694		0.152041	0.124403	0.153861	0.068212	0.184878	0.101916		0.150086	0.072303	0.399959	0.066023	0.23035	0.10164		0.109296	0.074463	0.185717	0.065901	0.177913	0.101718																			228
229	980-990	ILSRLDPPEAE	8	2.28624	0.100004	2.12883	0.053456	2.21821	0.144661		0.18271	0.131346	0.034841	0.143043	0.342013	0.148421		0.167112	0.177577	0.391715	0.102656	0.343871	0.179267		0.127158	0.118387	0.052945	0.056856	0.168963	0.146361																			229
230	982-989	SRLDPPEA	5	1.55948	0.072926	1.42084	0.076702	1.58306	0.099781		-0.065558	0.154782	-0.23887	0.083285	0.107343	0.145081		0.178635	0.076364	0.504862	0.084212	0.141519	0.124189		0.451217	0.084323	0.624443	0.111383	0.386676	0.130191																			230
231	982-990	SRLDPPEAE	6	1.91027	0.102403	1.58177	0.112476	1.81662	0.084613		0.076229	0.181826	0.170076	0.150429	0.304178	0.08573		0.102652	0.19959	0.435062	0.122507	0.125964	0.133933		0.129127	0.107821	0.369739	0.119849	0.011559	0.104978																			231
232	993-1001	IDRLITGRL	8	2.83631	0.176908	3.1441	0.036677	3.29829	0.154304		n.a.	n.a.	n.a.	n.a.	n.a.	n.a.		0.233146	0.20535	0.279143	0.057632	0.348645	0.195891		0.381442	0.189185	0.245461	0.200661	0.202082	0.160891																			232
233	994-1001	DRLITGRL	7	2.89622	0.036515	2.95312	0.129479	3.13948	0.155263		0.137774	0.13787	0.166493	0.167093	0.160888	0.163088		0.135505	0.053951	0.314329	0.136329	0.177701	0.180599		0.182505	0.061327	0.165218	0.129482	0.045166	0.167197																			233
234	1003-1019	SLQTYVTQQLIRAAEIR	16	2.08017	0.042312	3.07854	0.245627	5.75562	0.250694		0.383542	0.447162	-0.195678	0.245809	0.406748	0.254277		-0.071368	0.070324	0.190899	0.264228	0.261546	0.363519		0.168632	0.116916	-0.142327	0.325205	-0.45232	0.346052																			234
235	1016-1024	AEIRASANL	8	2.19415	0.029469	2.84063	0.041451	4.26411	0.072655		0.079085	0.041675	0.622849	0.226616	0.809385	0.097334		-0.155444	0.0635	0.194008	0.051454	0.520236	0.14644		-0.088961	0.045587	0.143334	0.043007	0.18059	0.074436																			235
236	1018-1024	IRASANL	6	0.911261	0.17213	1.83899	0.043372	3.28943	0.059561		0.217123	0.184563	0.569158	0.07508	0.147941	0.175151		0.271332	0.172141	1.22451	0.060439	0.24819	0.091463		0.480141	0.2525	0.888489	0.044433	0.215335	0.096794																			236
237	1025-1031	AATKMSE	6	0.658764	0.049468	1.01208	0.084373	1.81745	0.112649		-0.164852	0.123676	0.056055	0.087444	0.152238	0.128453		0.014053	0.063812	0.097066	0.092024	0.279687	0.125855		-0.008963	0.055756	0.072804	0.167213	0.112247	0.120296																			237
238	1032-1042	CVLGQSKRVDF	10	2.51832	0.075857	2.79699	0.233633	3.25267	0.232901		0.268051	0.101178	0.058426	0.242144	0.102713	0.23563		-0.195276	0.107456	-0.11014	0.234047	0.422762	0.293473		-0.098931	0.094226	-0.1988	0.365913	0.234683	0.262717																			238
239	1032-1046	CVLGQSKRVDFCGKG	14	3.33774	0.276242	3.17976	0.198471	3.35186	0.182153		-1.43862	0.30727	-0.71398	0.240573	0.102575	0.195673		-0.090424	0.293304	0.21194	0.307033	0.342502	0.205901		0.192996	0.292586	-0.061704	0.216904	0.278562	0.191713																			239
240	1034-1042	LGQSKRVDF	8	2.02907	0.132953	2.30968	0.216945	2.60833	0.188148		-0.236568	0.237293	-0.50796	0.227665	-0.612244	0.20023		-0.192846	0.222414	-0.047986	0.264979	0.322129	0.237635		-0.105338	0.217883	-0.219297	0.37634	0.221943	0.238395																			240
241	1034-1049	LGQSKRVDFCGKGYHL	15	2.72605	0.147832	3.0961	0.200733	3.70381	0.328941		0.606746	0.370961	0.054532	0.201305	0.429636	0.32929		-0.543432	0.220474	-0.336083	0.213019	0.60146	0.404156		-0.080725	0.155193	-1.01359	0.201364	0.331018	0.343117																			241
242	1035-1042	GQSKRVDF	7	1.8685	0.020246	1.56828	0.112604	1.67173	0.092035		n.a.	n.a.	n.a.	n.a.	n.a.	n.a.		-0.270337	0.067085	0.040602	0.167778	0.215851	0.252726		-0.126283	0.059876	0.053417	0.112896	0.305456	0.094163																			242
243	1043-1049	CGKGYHL	6	0.467218	0.059162	0.471961	0.076055	0.733691	0.08505		0.079198	0.132149	0.075582	0.09911	0.232702	0.110783		-0.051983	0.086321	0.026097	0.096394	0.203231	0.111975		-0.050391	0.088174	0.021655	0.182457	0.171169	0.111981																			243
244	1049-1059	LMSFPQSAPHG	8	0.562052	0.1375	1.28141	0.257736	2.53522	0.281421		n.a.	n.a.	n.a.	n.a.	n.a.	n.a.		n.a.	n.a.	0.102231	0.27396	0.430643	0.361929		0.041574	0.158079	n.a.	n.a.	0.240245	0.301821																			244
245	1053-1063	PQSAPHGVVFL	8	0.456964	0.025866	0.501376	0.028464	1.05584	0.026009		0.093584	0.045884	0.320005	0.138677	0.307467	0.067748		-0.070251	0.038371	0.045627	0.034162	0.543702	0.05164		-0.131586	0.05693	0.274926	0.035321	0.396829	0.146041																			245
246	1079-1095	PAICHDGKAHFPREGVF	14	1.29358	0.027574	1.4531	0.136203	2.12263	0.14824		-0.08849	0.068107	-0.168567	0.156853	0.138317	0.14824		-0.127152	0.043691	0.099188	0.148128	0.451891	0.163272		0.073329	0.036352	-0.103141	0.136466	0.320796	0.172191																			246
247	1091-1099	REGVFVSNG	8	2.32036	0.165408	2.52762	0.137269	2.63146	0.139699		-0.079544	0.203403	n.a.	n.a.	-0.488353	0.159422		-0.108141	0.25336	0.023964	0.144052	0.319863	0.148356		0.243967	0.194834	-0.231672	0.137269	0.234032	0.1457																			247
248	1103-1116	FVTQRNFYEPQIIT	12	2.27463	0.126372	3.82596	0.00795	5.42586	0.239911		0.317669	0.137438	0.133303	0.049223	-0.046547	0.26218		0.128452	0.141519	0.084196	0.056493	0.43821	0.267224		0.196476	0.141974	0.211871	0.194866	0.239633	0.240243																			248
249	1103-1117	FVTQRNFYEPQIITT	13	2.86724	0.069216	4.07329	0.12416	5.59809	0.233569		0.306044	0.15247	0.247635	0.140699	0.136098	0.238365		-0.07868	0.093012	0.144978	0.154743	0.524576	0.243873		0.067098	0.078393	-0.049539	0.124594	0.320842	0.245905																			249
250	1109-1116	FYEPQIIT	6	0.853539	0.069838	1.52048	0.102917	2.85266	0.044035		1.08096	0.088346	0.989783	0.119724	0.319434	0.049092		0.507286	0.154412	0.636781	0.131141	0.336262	0.05183		0.639833	0.075036	0.677787	0.15149	0.264218	0.059589																			250
251	1109-1117	FYEPQIITT	7	1.44135	0.081752	2.0674	0.032951	3.38585	0.122155		0.177435	0.094764	0.204807	0.03569	0.008999	0.134598		0.131637	0.084299	0.107807	0.046635	0.170185	0.135432		0.188812	0.083359	-0.133804	0.034334	0.058005	0.129666																			251
252	1110-1117	YEPQIITT	6	2.05059	0.077845	2.31493	0.098612	2.88706	0.170694		n.a.	n.a.	n.a.	n.a.	n.a.	n.a.		-0.114608	0.094803	0.017212	0.107241	0.11973	0.173623		0.007284	0.081176	-0.109377	0.099232	-0.118246	0.217818
253	1118-1127	DNTFVSGNCD	9	2.98817	0.155637	2.80013	0.238382	3.30966	0.127477		n.a.	n.a.	n.a.	n.a.	n.a.	n.a.		-0.116363	0.286218	-0.09552	0.240623	0.334941	0.134457		-0.109079	0.214137	n.a.	n.a.	0.271099	0.165603
254	1121-1127	FVSGNCD	6	1.27496	0.054181	0.956593	0.14821	0.991337	0.157214		-0.048678	0.098987	0.053829	0.178085	0.185032	0.173794		-0.202391	0.125425	0.087931	0.156454	0.310747	0.159167		-0.196044	0.06267	0.272926	0.201272	0.285326	0.160633
255	1148-1169	FKEELDKYFKNHTSPDVDLGDI	20	9.63683	0.214141	9.17661	0.16603	9.47563	0.320784		0.190829	0.214141	0.43671	0.16603	0.819129	0.320784		0.055097	0.275446	0.504291	0.247516	0.359841	0.339572		-0.021405	0.245489	n.a.	n.a.	0.391813	0.342645
256	1167-1173	GDISGIN	6	2.08219	0.054093	1.7808	0.136496	1.87774	0.157223		-1.22472	0.064731	-0.978345	0.136758	-1.0713	0.158432		-1.34634	0.06719	0.403844	0.152458	0.294067	0.188654		0.254318	0.156484	0.478321	0.136606	0.305693	0.193971
257	1175-1186	SVVNIQKEIDRL	11	5.52459	0.1483	5.46749	0.046487	5.83644	0.095865		0.520234	0.292898	0.551242	0.063688	0.322587	0.096252		0.293809	0.231217	0.438544	0.046737	0.239604	0.122441		0.336693	0.151162	0.357901	0.163959	0.132941	0.098166
258	1175-1188	SVVNIQKEIDRLNE	13	6.72863	0.118907	6.35552	0.04953	6.70523	0.143079		0.544251	0.30049	0.874742	0.050107	0.738448	0.205951		-0.073827	0.201046	0.384954	0.076529	0.455909	0.178721		0.091164	0.1729	0.07992	0.049651	0.237764	0.166926
259	1177-1188	VNIQKEIDRLNE	11	6.27331	0.124533	5.9986	0.133983	6.2461	0.205166		n.a.	n.a.	n.a.	n.a.	n.a.	n.a.		0.0722	0.23388	0.370585	0.201066	0.228387	0.337086		0.165871	0.19621	0.068479	0.265779	0.127699	0.329134
260	1178-1186	NIQKEIDRL	8	5.01319	0.115751	4.77055	0.274268	5.14604	0.134637		-0.104064	0.343859	-0.088789	0.275356	n.a.	n.a.		0.334477	0.355678	0.512746	0.289653	0.107422	0.24238		0.413737	0.264855	0.590993	0.274964	0.122537	0.201668
261	1179-1188	IQKEIDRLNE	9	3.42631	0.013933	3.16017	0.077997	3.28681	0.068355		-0.314293	0.115797	0.0428	0.090222	0.348204	0.107383		-0.119943	0.07232	0.136915	0.078717	0.239137	0.158385		-0.140965	0.075201	0.116176	0.084422	0.195578	0.167176
262	1187-1197	NEVAKNLNESL	10	1.39447	0.100481	1.86623	0.130625	2.6362	0.112984		-0.367131	0.10814	n.a.	n.a.	-0.111354	0.174214		-0.08438	0.239676	-0.247292	0.242004	0.287492	0.142031		-0.097335	0.251713	-0.517688	0.226141	0.032855	0.143631
263	1201-1213	QELGKYEQVDGSA	12	4.87797	0.122349	4.38406	0.256051	4.67579	0.229182		-0.118057	0.135857	0.273519	0.257507	0.153584	0.232867		-0.170489	0.194873	0.398709	0.256371	0.321756	0.27381		-0.163808	0.145481	-0.075751	0.25677	0.122757	0.230182
264	1207-1213	EQVDGSA	6	2.08125	0.08944	1.88102	0.194882	2.09836	0.000262		0.162059	0.156223	0.192881	0.218603	0.088838	0.015241		-0.04407	0.184059	0.075527	0.223849	0.033087	0.00037		0.040859	0.090119	-0.005804	0.195194	-0.236295	0.054411
265	1214-1220	WSHPQFE	5	0.907376	0.06994	0.793385	0.089906	0.874986	0.081526		-0.026653	0.092976	-0.026914	0.101583	0.026863	0.085826		-0.078205	0.092122	0.073215	0.095227	0.161567	0.093732		-0.064359	0.083322	-0.133095	0.090171	0.109288	0.087828
266	1214-1233	WSHPQFEKGGGSGGGSGGSA	18	4.08578	0.142318	3.68862	0.435962	3.8199	0.297131		0.225751	0.149806	0.287968	0.436175	-0.063184	0.306687		-0.463674	0.273259	0.081643	0.452391	0.869045	0.308088		-0.397191	0.257722	-0.656918	0.534516	0.549462	0.307727
267	1220-1240	EKGGGSGGGSGGSAWSHPQFE	19	4.74948	0.007863	3.89992	0.349094	4.06795	0.281986		-0.520285	0.011119	-0.285261	0.349183	-0.240774	0.293923		-0.66321	0.011119	0.309333	0.350846	0.877398	0.307833		-0.641542	0.049575	0.01487	0.664179	0.698742	0.295672
[truncated: 17 more columns]

## Sheet: RBD-Wuhan
Table: Deuterium exchange values for different pepsin-digested fragments of wild-type wuhan RBD(W) in the presence or absence of different proteins. The values are an average of replicate measurements with standard deviation (SD) values indicated.
				Relative Uptake of peptides of RBD(W) in apo state							RBD(W):LSI-CoVA-014 complex minus RBD(W)							RBD(W):LSI-CoVA-015 complex minus RBD(W)							RBD(W):LSI-CoVA-016 complex minus RBD(W)							RBD(W):CR3022 complex minus RBD(W)					RBD(W):CoVA2-39 complex minusRBD(W)					RBD(W):CoVA2-04 complex minus RBD(W)
				1 min		10 min		100 min			1 min		10 min		100 min			1 min		10 min		100 min			1 min		10 min		100 min			1 min		10 min			1 min		10 min			1 min		10 min
S.No.	Residue No.s	Sequence	MEA	Uptake (Da)	± SD	Uptake (Da)	± SD	Uptake (Da)	± SD		ΔHDX (D)	± SD	ΔHDX (D)	± SD	ΔHDX (D)	± SD		ΔHDX (D)	± SD	ΔHDX (D)	± SD	ΔHDX (D)	± SD		ΔHDX (D)	± SD	ΔHDX (D)	± SD	ΔHDX (D)	± SD		ΔHDX (D)	± SD	ΔHDX (D)	± SD		ΔHDX (D)	± SD	ΔHDX (D)	± SD		ΔHDX (D)	± SD	ΔHDX (D)	± SD
1	324-334	ESIVRFPNITN	9	1.00891	0.115427	1.59916	0.082468	2.36356	0.071741		0.2809	0.087987	0.236	0.034451	0.8317	0.087987		0.1726	0.223265	-0.2359	0.140501	1.1515	0.140501		0.4883	0.163659	0.3174	0.269129	1.0245	0.453385		-0.023559	0.11559	0.066098	0.082695		0.341455	0.119645	0.093806	0.094055		-0.223119	0.150531	-0.518045	0.170039
2	351-361	YAWNRKRISNC	10	1.03771	0.229437	1.55235	0.089411	2.3154	0.0551		0.4016	0.140501	0.5089	0.223265	0.734	0.140501		0.1819	0.36338	-0.2029	0.269371	1.3442	0.269371		0.3721	0.29981	0.296	0.230172	1.0903	0.286512		-0.04706	0.288182	0.21341	0.23568		0.383484	0.459893	-0.037629	0.200659		-0.212308	0.286148	-0.239291	0.263975
3	352-361	AWNRKRISNC	9	0.825433	0.047433	1.36475	0.068168	1.87861	0.051175		0.2627	0.269371	0.1724	0.36338	-0.6956	0.269371		n.a.	n.a.	n.a.	n.a.	n.a.	n.a.		-0.0162	0.19307	0.485	0.127956	n.a.	n.a.		-0.19976	0.235046	n.a.	n.a.		0.184929	0.10644	0.268367	0.069588		-0.23979	0.151068	-0.087163	0.083684
4	353-361	WNRKRISNC	8	0.91435	0.040277	1.59563	0.058058	2.38879	0.05019		0.3359	0.285415	0.4716	0.279002	-0.0752	0.285415		0.4244	0.24596	-0.1442	0.135154	1.1293	0.135154		0.4274	0.111326	0.1326	0.215389	0.9455	0.07586		0.164504	0.064852	0.012129	0.078424		0.390984	0.062029	0.040594	0.098353		-0.024127	0.076299	-0.346022	0.075602
5	365-378	YSVLYNSASFSTFK	13	0.625599	0.044719	1.0013	0.023277	1.89013	0.106248		0.2611	0.170849	0.0452	0.144412	-0.0259	0.170849		0.1919	0.144412	-0.2065	0.170849	0.3368	0.170849		0.1192	0.099141	0.0593	0.141027	0.3603	0.21366		n.a.	n.a.	n.a.	n.a.		n.a.	n.a.	n.a.	n.a.		n.a.	n.a.	n.a.	n.a.
6	369-393	YNSASFSTFKCYGVSPTKLNDLCFT	23	4.71253	0.221814	4.52409	0.119897	4.5012	0.045034		-1.7414	0.331399	-0.6097	0.507156	0.3376	0.331399		-1.5443	0.507156	-0.4879	0.331399	0.8051	0.331399		-1.8046	0.271242	-0.5478	0.207335	1.0427	0.064839		-2.03769	0.278987	-0.856776	0.22091		0.116255	0.232524	-0.458082	0.416873		-0.510471	0.222477	-0.551818	0.146942
7	377-387	FKCYGVSPTKL	9	2.81738	0.149302	2.95883	0.096508	3.07842	0.109471		n.a.	n.a.	n.a.	n.a.	n.a.	n.a.		-1.8505	0.238211	-1.4255	0.224433	-0.0461	0.224433		n.a.	n.a.	n.a.	n.a.	n.a.	n.a.		n.a.	n.a.	-0.148485	0.387907		n.a.	n.a.	n.a.	n.a.		-0.493519	0.244798	0.011726	0.132528
8	378-387	KCYGVSPTKL	8	1.91181	0.02174	2.51173	0.069512	2.73617	0.014639		-0.7667	0.083976	0.1116	0.02174	-0.1259	0.083976		-1.2111	0.02174	-1.1758	0.083976	0.6566	0.083976		-1.2552	0.082655	-1.4308	0.08973	-0.0904	0.080908		-0.361699	0.027362	0.323649	0.06987		-0.076457	0.073001	-0.034812	0.132553		0.151961	0.09461	-0.304357	0.09468
9	388-395	NDLCFTNV	19	3.11605	0.044704	3.68064	0.049879	4.13272	0.049772		-0.1486	0.135154	0.4226	0.135154	0.5171	0.24596		n.a.	n.a.	n.a.	n.a.	n.a.	n.a.		-0.1536	0.165889	0.323	0.080785	0.671	0.136115		-0.346135	0.22622	0.375896	0.208802		0.11566	0.249639	0.040911	0.113831		-0.238692	0.143038	-0.466766	0.073033
10	384-404	PTKLNDLCFTNVYADSFVIRG	7	1.70577	0.157761	2.22414	0.024016	2.39809	0.049742		1.4041	0.224433	1.061	0.135154	1.1295	0.224433		n.a.	n.a.	n.a.	n.a.	n.a.	n.a.		-1.0669	0.065222	-1.0573	0.05377	0.6663	0.067473		-0.323751	0.17722	-0.592528	0.04271		0.031721	0.195396	-0.002265	0.098744		-0.682585	0.194028	-0.533103	0.061945
11	392-399	FTNVYADS	7	0.355023	0.057771	1.09715	0.025518	1.78058	0.04834		-0.0539	0.047272	-0.2967	0.066737	0.224433	0.047272		0.0159	0.066737	-0.3571	0.047272	0.0266	0.047272		-0.012	0.04553	-0.1049	0.025189	0.0421	0.135329		n.a.	n.a.	n.a.	n.a.		n.a.	n.a.	n.a.	n.a.		n.a.	n.a.	n.a.	n.a.
12	393-399	TNVYADS	6	0.391321	0.039009	1.06933	0.020113	1.76954	0.067127		n.a.	n.a.	n.a.	n.a.	n.a.	n.a.		-0.1135	0.042948	-0.4351	0.06414	-0.1464	0.06414		-0.037	0.092205	-0.1971	0.0499	-0.1075	0.122385		-0.068114	0.041155	-0.218767	0.056635		0.00673	0.041568	-0.185201	0.024681		-0.080203	0.06768	-0.252246	0.02496
13	393-400	TNVYADSF	7	0.328288	0.02804	0.790142	0.042454	1.41051	0.039594		1.4995	0.067334	1.2548	0.065843	0.7122	0.067334		0.0082	0.065843	-0.2087	0.067334	0.2436	0.067334		0.2798	0.09053	0.0754	0.052962	0.2233	0.156839		-0.004638	0.031243	-0.156247	0.049313		-0.025449	0.0529	-0.118502	0.05992		-0.069487	0.141979	-0.184079	0.077528
14	400-406	FVIRGDE	6	0.118603	0.081407	0.330619	0.003101	0.75621	0.052828		n.a.	n.a.	n.a.	n.a.	n.a.	n.a.		0.0186	0.101247	-0.2118	0.036044	0.2353	0.036044		0.0029	0.046761	-0.0877	0.100845	0.1445	0.077296		0.08457	0.086024	-0.077909	0.037956		-0.017079	0.082563	-0.13452	0.043923		-0.061159	0.082536	-0.088672	0.034543
15	400-421	FVIRGDEVRQIAPGQTGKIADY	20	2.08589	0.029191	3.92686	0.085878	6.48404	0.170225		0.593	0.140679	0.7683	0.234685	1.5681	0.140679		0.2568	0.234685	-0.5531	0.140679	1.4581	0.140679		-0.8402	0.149325	0.0208	0.308791	0.9689	0.26076		0.246624	0.321202	-0.067007	0.299405		0.025508	0.301257	-0.430271	0.220832		-0.443037	0.295853	-0.500891	0.153396
16	401-420	VIRGDEVRQIAPGQTGKIAD	18	2.49892	0.042811	4.18784	0.136166	6.31039	0.069448		0.6242	0.227275	0.8031	0.090547	1.4293	0.227275		0.5108	0.090547	-0.6719	0.227275	1.3205	0.227275		0.4308	0.087462	0.0085	0.284204	0.9904	0.22149		-0.228444	0.110175	-0.007395	0.249484		-0.354821	0.099328	-0.108733	0.15803		-0.579996	0.093446	-0.557971	0.16893
17	401-421	VIRGDEVRQIAPGQTGKIADY	19	2.93866	0.011091	4.01199	0.011091	6.55929	0.062963		n.a.	n.a.	n.a.	n.a.	n.a.	n.a.		n.a.	n.a.	n.a.	n.a.	n.a.	n.a.		-0.0875	0.214034	0.2662	0.200981	0.982	0.106338		-0.097212	0.12393	0.218259	0.213058		0.093666	0.038194	-0.022827	0.092355		-0.916134	0.145227	-0.347834	0.044099
18	407-420	VRQIAPGQTGKIAD	12	1.76392	0.224767	2.78199	0.067643	3.98561	0.036232		-0.1101	0.135963	0.3193	0.349489	1.0392	0.135963		0.1262	0.349489	0.4492	0.135963		0.135963		n.a.	n.a.	n.a.	n.a.	n.a.	n.a.		0.163218	0.22667	-0.021301	0.195963		0.166826	0.296003	-0.315702	0.100075		-0.64479	0.245718	-0.670527	0.097539
19	407-422	VRQIAPGQTGKIADYN	14	1.79758	0.20506	2.86822	0.146591	4.51529	0.008419		0.2567	0.206186	-0.0272	0.231744	0.1448	0.206186		0.228	0.231744	-0.4663	0.206186	1.3423	0.206186		0.2527	0.159363	0.227	0.076006	1.0732	0.047239		0.021156	0.212545	0.084409	0.242998		0.068185	0.211487	-0.348352	0.173717		-0.787449	0.242512	-0.57102	0.191227
20	408-422	RQIAPGQTGKIADYN	13	1.9307	0.18948	2.84708	0.103783	4.30359	0.047542		-0.3341	0.457973	0.1137	0.301239	-0.4859	0.457973		0.0926	0.301239	-0.0752	0.457973	1.3403	0.457973		0.1411	0.116278	0.2313	0.153327	0.9752	0.175259		0.033647	0.14911	0.282915	0.274799		0.016543	0.082925	-0.364373	0.108632		-0.746988	0.102304	-0.420145	0.144792
21	412-420	PGQTGKIAD	7	1.3343	0.147824	1.81377	0.074585	2.56927	0.014627		0.1983	0.157496	0.0662	0.200613	0.4483	0.157496		-0.0695	0.200613	-0.3308	0.157496	0.7262	0.157496		0.1287	0.071051	-0.1904	0.080133	0.4205	0.020685		0.069025	0.172864	-0.063906	0.117772		-0.056744	0.154141	-0.228535	0.096375		-0.588571	0.168583	-0.399093	0.088646
22	415-422	TGKIADYN	7	1.21037	0.109273	1.66528	0.056214	2.65647	0.054241		n.a.	n.a.	n.a.	n.a.	n.a.	n.a.		-0.0105	0.200545	0.0147	0.284698	0.6696	0.284698		0.0555	0.112035	0.1396	0.113273	0.7952	0.117126		0.729542	0.140324	0.531041	0.071088		0.043214	0.116289	-0.040926	0.094249		0.437482	0.111407	0.028651	0.064109
23	421-428	YNYKLPDD	6	0.295903	0.059564	0.624959	0.039874	1.68495	0.075991		-0.0027	0.041517	0.1155	0.069441	0.3482	0.041517		0.0562	0.069441	-0.1106	0.041517	0.2269	0.041517		0.0816	0.192405	-0.0577	0.151469	0.1917	0.098596		-0.071893	0.060715	-0.053062	0.061603		n.a.	n.a.	n.a.	n.a.		n.a.	n.a.	n.a.	n.a.
24	421-429	YNYKLPDDF	7	0.510976	0.054274	0.801252	0.02216	1.77451	0.062288		0.044	0.115546	0.2239	0.126627	0.4272	0.115546		-0.043	0.126627	-0.236	0.115546	0.2954	0.115546		-0.2228	0.00946	-0.0957	0.030064	0.2064	0.13618		-0.098831	0.099471	0.110772	0.091443		-0.196112	0.041933	-0.2345	0.033495		-0.101019	0.095722	-0.122486	0.081903
25	423-429	YKLPDDF	11	1.09517	0.177134	1.28263	0.058632	2.4811	0.082181		n.a.	n.a.	n.a.	n.a.	n.a.	n.a.		-0.0483	0.212579	-0.1707	0.238211	0.0424	0.200545		-0.1153	0.16263	-0.0044	0.157661	0.0625	0.184966		n.a.	n.a.	n.a.	n.a.		n.a.	n.a.	n.a.	n.a.		n.a.	n.a.	n.a.	n.a.
26	421-433	YNYKLPDDFTGCV	5	0.371965	0.006689	0.503345	0.02931	0.848718	0.006689		0.2644	0.136316	0.2036	0.148024	0.5566	0.136316		-0.1255	0.148024	-0.3127	0.136316		0.036316		-0.1507	0.470905	0.1718	0.316121	0.5471	0.00946		-0.009635	0.031256	0.077184	0.045948		0.083477	0.018877	-0.003806	0.047976		-0.100435	0.042113	-0.136805	0.031782
27	423-431	YKLPDDFTG	7	0.735222	0.00692	0.784187	0.031288	1.33443	0.006938		0.0253	0.162989	0.2208	0.18439	0.3739	0.162989		-0.2037	0.18439	-0.2127	0.162989	0.1053	0.162989		-0.2408	0.224267	-0.0531	0.074965	0.0331	0.165101		-0.105189	0.009852	0.054536	0.039188		-0.061368	0.009786	-0.021764	0.047519		-0.271132	0.052704	-0.169131	0.032044
28	432-441	CVIAWNSNNL	9	1.68186	0.20703	1.63933	0.056647	2.01706	0.050847		0.1725	0.121364	0.4896	0.207959	0.557	0.121364		-0.3019	0.207959	0.1076	0.121364	1.3834	0.121364		0.2322	0.177878	0.5149	0.087044	0.7279	0.074738		-0.402858	0.227995	-0.047115	0.114725		-0.127085	0.213098	-0.134672	0.067151		-0.628293	0.229032	-0.431764	0.075018
29	433-441	VIAWNSNNL	8	2.32646	0.033809	2.41801	0.07212	2.4189	0.042137		-0.5123	0.079652	-0.515	0.154732	0.3013	0.079652		0.1004	0.154732	0.2509	0.079652	1.3926	0.079652		0.1623	0.240856	0.0862	0.057675	0.7953	0.074277		-1.00822	0.127181	-0.485667	0.087661		-0.793376	0.099032	-0.822686	0.088065		-1.35166	0.144898	-1.1108	0.132072
30	434-441	IAWNSNNL	7	1.58025	0.145339	1.56726	0.075642	1.65983	0.0134		0.3124	0.103709	0.4623	0.241049	0.5608	0.103709		0.1305	0.241049	0.0382	0.103709	0.8583	0.103709		0.2713	0.226783	0.5449	0.125696	0.7641	0.033687		-0.800074	0.252078	-0.689639	0.085427		-0.528149	0.171929	-0.841277	0.193501		-0.949755	0.150464	-0.836631	0.076075
31	442-449	DSKVGGNY	7	2.14463	0.226916	2.2126	0.042369	2.22061	0.012755		0.4082	0.137541	0.3347	0.279043	0.4765	0.137541		0.1466	0.279043	-0.3688	0.137541	0.4336	0.137541		0.2116	0.3733	0.1479	0.314273	0.3886	0.059646		0.131096	0.115304	-0.036438	0.165101		0.252103	0.114645	-0.054798	0.058876		-0.245833	0.068754	-0.334449	0.044135
32	443-452	SKVGGNYNYL	9	2.70105	0.068189	2.76107	0.087558	2.83041	0.039931		-1.0131	0.104961	-0.1994	0.396437	0.3883	0.104961		-0.1931	0.396437	0.136	0.104961	1.3378	0.104961		0.6347	0.159878	0.8126	0.074997	1.2545	0.102788		-0.266123	0.141678	0.181152	0.203165		0.360488	0.232461	0.009457	0.149397		-0.718185	0.209131	-0.562655	0.133625
33	444-452	KVGGNYNYL	8	2.28367	0.237597	2.65817	0.07095	2.70199	0.018707		0.3997	0.306936	0.2895	0.271096	0.4382	0.306936		0.3516	0.271096	-0.3203	0.306936	0.7943	0.306936		0.5212	0.321621	0.4458	0.141766	0.7408	0.304518		n.a.	n.a.	n.a.	n.a.		n.a.	n.a.	n.a.	n.a.		n.a.	n.a.	n.a.	n.a.
34	456-467	FRKSNLKPFERD	10	0.488132	0.019959	1.61406	0.063521	2.19263	0.056298		0.2826	0.101824	0.5658	0.080178	0.836	0.101824		0.2899	0.080178	-0.0304	0.101824	1.1161	0.101824		0.4016	0.390521	0.4769	0.049852	1.0639	0.068709		0.421561	0.069233	0.643903	0.230996		0.450163	0.076149	0.200203	0.086735		0.088307	0.033167	-0.065222	0.085069
35	456-470	FRKSNLKPFERDIST	13	1.97853	0.280687	3.39784	0.070607	4.19135	0.090586		n.a.	n.a.	n.a.	n.a.	n.a.	n.a.		n.a.	n.a.	n.a.	n.a.	n.a.	n.a.		0.23	0.04	0.31	0.155941	1.1405	0.175317		0.567894	0.285991	0.764242	0.150864		0.712579	0.28278	0.375387	0.140589		-0.030118	0.311097	-0.219555	0.265967
36	460-467	NLKPFERD	6	2.22751	0.375852	2.71216	0.049263	2.83923	0.052165		n.a.	n.a.	n.a.	n.a.	n.a.	n.a.		0.374	0.397599	0.0191	0.151475	0.2288	0.151475		0.5414	0.312133	0.4226	0.1415	0.4747	0.096679		0.178982	0.150223	0.073767	0.066956		0.581473	0.137393	0.256417	0.091409		0.108151	0.142458	-0.349546	0.074228
37	471-482	EIYQAGSTPCNG	10	2.90735	0.323853	2.89834	0.076803	2.82148	0.04306		0.4777	0.135375	0.5995	0.438788	0.8242	0.135375		0.2947	0.438788	-0.1374	0.135375	1.1289	0.135375		0.5713	0.111933	0.625	0.32162	1.0561	0.063517		-0.924733	0.151785	-0.27939	0.215567		-0.715177	0.061205	-0.476657	0.106932		-0.87407	0.104508	-0.720761	0.110314
38	471-486	EIYQAGSTPCNGVEGF	14	3.8977	0.293494	3.64824	0.133313	3.67212	0.073243		0.4569	0.255158	1.2998	0.294399	1.4369	0.255158		-0.0457	0.294399	0.029	0.255158	1.5493	0.255158		0.6565	0.135218	0.9966	0.305079	1.2544	0.212623		-1.34638	0.414964	-0.136475	0.215855		-0.498972	0.114359	-0.441137	0.079452		-1.58428	0.451686	-0.986494	0.157455
39	471-487	EIYQAGSTPCNGVEGFN	15	3.95314	0.025664	4.26686	0.141582	4.08362	0.126885		n.a.	n.a.	n.a.	n.a.	n.a.	n.a.		n.a.	n.a.	n.a.	n.a.	n.a.	n.a.		1.257	0.256153	1.0142	0.252178	1.1243	0.422457		n.a.	n.a.	n.a.	n.a.		n.a.	n.a.	n.a.	n.a.		n.a.	n.a.	n.a.	n.a.
40	472-486	IYQAGSTPCNGVEGF	13	3.38925	0.062957	4.03785	0.013702	4.55391	0.133716		n.a.	n.a.	n.a.	n.a.	n.a.	n.a.		0.069	0.468319	-0.429	0.280557	0.032	0.280557		0.5249	0.125021	0.062	0.077927	-0.0725	0.137837		-0.672671	0.206815	-0.700229	0.338728		-0.403167	0.125811	-1.18981	0.107479		-1.19052	0.247154	-1.67571	0.223418
41	472-487	IYQAGSTPCNGVEGFN	14	3.94478	0.062505	3.95823	0.187716	3.93984	0.083435		n.a.	n.a.	n.a.	n.a.	n.a.	n.a.		0.368	0.065705	-0.0021	0.19981	1.3325	0.19981		0.6613	0.140152	1.0332	0.103875	1.3544	0.273229		-1.15868	0.18647	-0.265487	0.34752		-0.671449	0.177064	-0.693863	0.128948		n.a.	n.a.	n.a.	n.a.
42	487-494	NCYFPLQS	6	1.46952	0.094943	2.14752	0.062486	2.54544	0.020965		0.1529	0.091524	0.3204	0.138166	0.329	0.091524		0.0917	0.138166	-0.0351	0.091524	0.4407	0.091524		0.1414	0.139499	0.2331	0.081075	0.3858	0.029932		-0.260935	0.085	0.155868	0.115406		-0.344085	0.097925	-0.34508	0.070209		-0.371396	0.110753	-0.359507	0.072831
43	487-495	NCYFPLQSY	7	1.55918	0.100065	2.55324	0.065636	2.90292	0.024828		0.0049	0.092185	0.1644	0.173428	0.2328	0.092185		0.0792	0.173428	0.0328	0.092185	0.6695	0.092185		0.1453	0.196849	0.3231	0.515862	0.6209	0.031353		-0.314352	0.062687	0.306851	0.067701		-0.31251	0.044159	-0.357713	0.088419		n.a.	n.a.	n.a.	n.a.
44	488-494	CYFPLQS	8	1.87432	0.140032	2.85235	0.084864	3.27549	0.042685		0.0131	0.094438	0.2199	0.152873	0.0284	0.094438		0.0343	0.152873	-0.0357	0.094438	0.3831	0.094438		0.0562	0.196117	-0.0079	0.181522	0.2896	0.070411		-0.319556	0.102148	0.135744	0.143765		-0.392641	0.100762	-0.294957	0.106007		0.077625	0.140206	-0.493406	0.109273
45	487-496	NCYFPLQSYG	5	1.10178	0.095881	1.74882	0.030407	2.15482	0.0372		0.5369	0.091217	0.2388	0.122397	0.4486	0.091217		0.6167	0.122397	-0.1411	0.091217	-0.161	0.091217		0.8033	0.101358	0.0681	0.236092	-0.1783	0.041342		-0.193186	0.132038	0.010827	0.094055		-0.350732	0.097163	-0.278473	0.090642		-0.241949	0.103862	-0.289395	0.081781
46	490-510	FPLQSYGFQPTNGVGYQPYRV	17	4.1889	0.02071	5.78829	0.19911	6.44225	0.129873		-0.1384	0.261726	-0.0813	0.025776	-0.0449	0.261726		0.8036	0.025776	0.4485	0.261726	1.8553	0.261726		0.952	0.109283	0.9075	0.28803	1.082	0.245257		-0.416972	0.213774	0.442264	0.341537		-0.319947	0.170383	-0.473622	0.243091		-0.528023	0.0454	-1.0336	0.237036
47	491-510	PLQSYGFQPTNGVGYQPYRV	19	4.92842	0.048992	5.40262	0.156398	6.18464	0.309693		0.4782	0.171042	0.17559	0.292953	0.097743	0.171042		0.5352	0.292953	-0.1628	0.171042	1.3562	0.171042		0.749	0.099985	0.8077	0.208621	1.2971	0.340603		-0.54951	0.190338	0.208624	0.564924		-0.66706	0.148618	-0.263603	0.198783		-1.95423	0.66126	-1.38744	0.664769
48	490-512	FPLQSYGFQPTNGVGYQPYRVVV	16	4.00673	0.046724	4.98986	0.221514	5.55099	0.130023		-0.4126	0.301676	-0.133	0.321687	-0.2133	0.301676		-0.2675	0.321687	0.2623	0.301676	1.2218	0.301676		-0.2838	0.120992	0.6416	0.11754	1.1565	0.186045		-0.710589	0.244661	0.254436	0.453202		-0.388675	0.227319	-0.300854	0.24796		-0.805278	0.188635	-1.05735	0.22905
49	491-512	PLQSYGFQPTNGVGYQPYRVVV	18	3.76633	0.004839	4.98395	0.117989	5.46024	0.112102		0.9509	0.120905	0.6291	0.088322	1.0388	0.120905		0.916	0.088322	-0.147	0.120905	1.2996	0.120905		0.9569	0.05005	0.8981	0.125378	1.4092	0.177807		-0.597658	0.259302	0.069122	0.336284		-0.461365	0.203043	-0.340752	0.189775		-0.524248	0.091852	-1.01655	0.123737
50	496-510	GFQPTNGVGYQPYRV	15	3.07725	0.379353	3.19472	0.155588	3.69363	0.135688		n.a.	n.a.	n.a.	n.a.	n.a.	n.a.		-0.1268	0.382123	-0.1039	0.224918	1.0055	0.224918		0.1499	0.082655	0.4971	0.146071	0.6925	0.283385		n.a.	n.a.	n.a.	n.a.		n.a.	n.a.	n.a.	n.a.		n.a.	n.a.	n.a.	n.a.
51	495-512	YGFQPTNGVGYQPYRVVV	16	3.20137	0.39784	3.22554	0.061394	3.89557	0.154146		n.a.	n.a.	n.a.	n.a.	n.a.	n.a.		0.3999	0.460736	-0.0508	0.17559	1.1321	0.17559		0.4349	0.165889	0.7085	0.163386	0.9595	0.26584		-0.468895	0.160844	0.16798	0.101494		n.a.	n.a.	n.a.	n.a.		n.a.	n.a.	n.a.	n.a.
52	495-513	YGFQPTNGVGYQPYRVVVL	12	2.97429	0.297264	3.0217	0.097656	3.30251	0.069566		0.78	0.155989	0.5612	0.369721	0.5173	0.155989		0.5322	0.369721	-0.028	0.155989	0.7987	0.155989		0.699	0.065222	0.6811	0.048143	0.7982	0.215444		n.a.	n.a.	n.a.	n.a.		-0.435973	0.16916	-0.468427	0.126053		-0.460131	0.085281	-0.527688	0.074377
53	496-513	GFQPTNGVGYQPYRVVVL	15	2.87438	0.38361	2.92773	0.123005	3.45546	0.119753		0.5244	0.316023	0.5499	0.46618	0.6759	0.316023		-0.9025	0.46618	-0.7943	0.316023	0.8164	0.316023		-0.4785	0.092205	0.1743	0.046817	0.7807	0.287556		-0.573037	0.187039	0.076231	0.254715		-0.478669	0.16586	-0.367256	0.156561		-0.71457	0.444234	-0.832219	0.20393
54	503-510	VGYQPYRV	6	0.972249	0.099817	1.04962	0.024644	1.45255	0.057118		n.a.	n.a.	n.a.	n.a.	n.a.	n.a.		0.0096	0.119906	-0.1737	0.074717	0.1445	0.074717		0.0413	0.09053	0.1519	0.225451	0.1737	0.152003		n.a.	n.a.	n.a.	n.a.		-0.337609	0.102917	-0.074305	0.030929		-0.343159	0.101724	-0.210189	0.215631
55	503-512	VGYQPYRVVV	8	0.903948	0.097732	0.988633	0.041655	1.38094	0.066601		n.a.	n.a.	n.a.	n.a.	n.a.	n.a.		-0.092	0.097743		n.a.	0.0423	n.a.		-0.015	0.094062	0.0637	0.229172	-0.0426	0.145672		n.a.	n.a.	n.a.	n.a.		n.a.	n.a.	n.a.	n.a.		-0.338102	0.100121	-0.192579	0.041682
56	503-513	VGYQPYRVVVL	9	0.794798	0.083213	0.86217	0.017038	1.32329	0.045446		0.2858	0.09897	0.3072	0.135052	0.3439	0.09897		0.0451	0.135052	-0.0663	0.09897	-0.1134	0.09897		0.0695	0.163659	0.0878	0.16313	-0.0955	0.072647		n.a.	n.a.	n.a.	n.a.		n.a.	n.a.	n.a.	n.a.		n.a.	n.a.	n.a.	n.a.
57	516-532	ELLHAPATVCGPKKSTN	14	2.57642	0.095422	2.91667	0.104099	2.96691	0.086856		n.a.	n.a.	n.a.	n.a.	n.a.	n.a.		-0.0257	0.098896	0.06	0.195984	1.8364	0.195984		0.9272	0.099985	1.3263	0.429078	1.7021	0.1092		-0.689217	0.105173	-0.069942	0.299982		-0.32172	0.2383	-0.314571	0.28974		-0.730352	0.104801	-0.693866	0.140771
58	518-533	LHAPATVCGPKKSTNL	13	2.93025	0.291956	2.60448	0.221778	2.62385	0.070773		n.a.	n.a.	n.a.	n.a.	n.a.	n.a.		0.2949	0.30444	0.0616	0.222429	1.7518	0.222429		0.2194	0.19307	1.1439	0.103713	1.7787	0.120441		n.a.	n.a.	n.a.	n.a.		n.a.	n.a.	n.a.	n.a.		n.a.	n.a.	n.a.	n.a.
59	519-533	HAPATVCGPKKSTNL	12	2.57568	0.044543	3.01729	0.133882	3.0918	0.071149		0.6825	0.197634	1.0006	0.074717	1.1664	0.119906		n.a.	n.a.	n.a.	n.a.	n.a.	n.a.		0.7577	0.111326	1.0639	0.342747	1.3514	0.113319		n.a.	n.a.	n.a.	n.a.		-0.60295	0.100699	-0.310507	0.114482		-0.645063	0.230585	-0.829994	0.18074
60	542-552	NFNGLTGTGVL	10	2.25615	0.372052	2.17366	0.303759	2.24225	0.294209		-0.1474	0.422497	0.5929	0.478817	1.2116	0.422497		0.4829	0.478817	0.104	0.422497	1.2358	0.422497		0.8881	0.099141	0.7229	0.079078	1.1038	0.416917		-0.395234	0.313587	0.198471	0.320641		0.282087	0.330578	0.029726	0.317543		-0.719684	0.373258	-0.826843	0.332769
61	544-552	NGLTGTGVL	8	2.20122	0.228959	2.17184	0.070879	2.21721	0.033143		n.a.	n.a.	n.a.	n.a.	n.a.	n.a.		0.1972	0.238025	-0.0551	0.108369	0.7935	0.108369		0.1761	0.196117	0.4753	0.087399	0.7135	0.051822		-0.339393	0.233636	-0.01302	0.140758		-0.048044	0.241753	-0.142989	0.086893		-0.761373	0.244772	-0.555069	0.080184
62	546-552	LTGTGVL	6	1.85141	0.156685	1.85379	0.044032	1.92116	0.020912		-0.4323	0.108369	-0.0622	0.238025	0.3413	0.108369		n.a.	n.a.	n.a.	n.a.	n.a.	n.a.		0.2248	0.101358	0.3025	0.049025	0.7387	0.045572		0.049011	0.092525	0.158027	0.078654		0.317664	0.050253	0.087377	0.05472		-0.273726	0.046508	-0.302875	0.046957
63	553-565	TESNKKFLPFQQF	11	2.89978	0.32336	3.01267	0.057237	3.03727	0.042118		-0.2346	0.140274	0.2835	0.324206	0.8092	0.140274		0.4003	0.324206	0.0182	0.140274	1.0687	0.140274		0.4536	0.109283	0.6359	0.116058	0.9582	0.049968		-0.10584	0.346916	0.48689	0.134536		0.246925	0.352195	0.055708	0.119876		-0.626087	0.380303	-0.638138	0.116888
64	555-568	SNKKFLPFQQFGRD	12	2.79874	0.38606	n.a.	n.a.	3.01371	0.044231		n.a.	n.a.	n.a.	n.a.	n.a.	n.a.		0.8427	0.464504		n.a.	1.6078	n.a.		0.8405	0.195984			1.465	0.052768		0.02662	0.143544	0.048801	0.124913		0.446954	0.177836	0.005073	0.164972		-0.393139	0.078087	-0.613754	0.191427
65	569-575	IADTTDA	15	1.95849	0.016198	2.78643	0.120557	2.882	0.049265		0.1048	0.243495	0.3175	0.203944	0.4541	0.243495		-0.0776	0.203944	-0.3317	0.243495	0.2354	0.243495		0.0266	0.222429	0.107	0.121641	0.2257	0.051859		-0.047459	0.186602	-0.007538	0.062503		0.015194	0.183408	-0.042312	0.047814		-0.340839	0.187906	-0.257349	0.05129
66	567-583	RDIADTTDAVRDPQTLE	6	1.29482	0.179726	1.3191	0.03971	1.33734	0.038351		0.5146	0.116325	0.7126	0.221497	0.8622	0.116325		0.4551	0.221497	0.0038	0.116325	1.1112	0.116325		0.5376	0.098896	0.6117	0.047871	1.0503	0.064742		-0.155521	0.176452	0.059535	0.117818		0.175044	0.173991	0.028916	0.118907		-0.430008	0.161503	-0.373565	0.070636
67	576-582	VRDPQTL	6	2.12748	0.152853	2.22636	0.068836	2.26476	0.02195		n.a.	n.a.	n.a.	n.a.	n.a.	n.a.		0.0029	0.211714	-0.0843	0.158282	0.2384	0.158282		-0.0181	0.195984	0.109	0.087399	0.2417	0.03117		-0.085281	0.143562	-0.026116	0.166713		0.09377	0.154155	-0.007679	0.482249		-0.320861	0.130247	-0.262871	0.050071
68	576-583	VRDPQTLE	5	1.65673	0.124282	1.72433	0.037754	1.75759	0.013183		-0.7571	0.098421	-0.3175	0.124708	-0.1374	0.098421		-0.1668	0.124708	-0.1635	0.098421	0.2675	0.098421		-0.1372	0.222429	0.1934	0.049025	0.2177	0.13888		-0.069744	0.172121	0.029909	0.068013		0.102142	0.170369	0.068696	0.077365		-0.419575	0.16363	-0.296102	0.052605

## Sheet: RBD-Delta
Table: Deuterium exchange values for different pepsin-digested fragments of RBD(Delta) variant in the presence or absence of different proteins. The values are an average of replicate measurements with standard deviation (SD) values indicated.
				Relative Uptake of peptides of RBD-Delta in apo state							RBD(Delta):LSI-CoVA-014 complex minus RBD(Delta)							RBD(Delta):LSI-CoVA-015 complex minus RBD(Delta)							RBD(Delta):LSI-CoVA-016 complex minusRBD(Delta)							RBD(Delta):ACE2 complex minus RBD(Delta)							RBD(Delta):CoVA2-04 complex minus RBD(Delta)							RBD(Delta):5A6 complex minusRBD(Delta)
				1 min		10 min		100 min			1 min		10 min		100 min			1 min		10 min		100 min			1 min		10 min		100 min			1 min		10 min		100 min			1 min		10 min		100 min			1 min		10 min
S.No.	Residue No.s	Sequence	MEA	Uptake (Da)	± SD	Uptake (Da)	± SD	Uptake (Da)	± SD		ΔHDX (D)	± SD	ΔHDX (D)	± SD	ΔHDX (D)	± SD		ΔHDX (D)	± SD	ΔHDX (D)	± SD	ΔHDX (D)	± SD		ΔHDX (D)	± SD	ΔHDX (D)	± SD	ΔHDX (D)	± SD		ΔHDX (D)	± SD	ΔHDX (D)	± SD	ΔHDX (D)	± SD		ΔHDX (D)	± SD	ΔHDX (D)	± SD	ΔHDX (D)	± SD		ΔHDX (D)	± SD	ΔHDX (D)	± SD
1	313-325	YFQSAARVQPTES	11	4.8523	0.027743	4.85933	0.122475	4.73376	0.05607		-0.06422	0.06755	-0.30088	0.15231	-0.187532	0.129769		-0.092799	0.034865	-0.043242	0.126756	0.001785	0.101728		-0.179199	0.058256	-0.26711	0.176109	-0.203046	0.059915		-0.178726	0.047586	-0.169347	0.126934	-0.164239	0.091923		-0.111573	0.082634	0.067473	0.13724	-0.061584	0.06865		n.a.	n.a.	-0.325723	0.124282
2	320-340	VQPTESIVRFPNITNLCPFGE	17	2.93113	0.05451	4.99543	0.0728	6.06107	0.118206		0.089669	0.065199	-0.34543	0.122772	-0.31573	0.178195		-0.163923	0.09418	-0.374385	0.084824	-0.355577	0.130926		-0.103138	0.066895	-0.503962	0.134609	-0.69059	0.141539		-0.041419	0.077356	-0.414092	0.105766	-0.404638	0.17285		-0.109379	0.065881	-0.433959	0.085852	-0.612868	0.124486		-0.155516	0.138233	-0.561311	0.113421
3	348-361	ASVYAWNRKRISNC	13	2.25734	0.029763	3.93229	0.038273	5.81445	0.076356		0.034091	0.03856	-0.673099	0.279549	-1.08522	0.107934		-0.282133	0.071115	-0.688748	0.050276	-0.742859	0.147237		-0.213342	0.049795	-1.18707	0.076768	-1.23946	0.121837		-0.018134	0.086749	-0.890197	0.054028	-0.83614	0.202133		-0.088415	0.038027	-1.31366	0.049923	-2.55663	0.10583		0.01685	0.062042	-1.26615	0.043384
4	351-361	YAWNRKRISNC	10	1.94778	0.05003	2.73133	0.083063	3.522	0.019775		0.031837	0.071283	-0.385694	0.186424	-0.516709	0.070292		-0.11031	0.064025	-0.29784	0.085983	-0.455473	0.019983		-0.152571	0.062315	-0.612852	0.098701	-0.646736	0.111842		0.050619	0.079691	-0.3327	0.100373	-0.286301	0.084788		-0.018495	0.054301	-0.337706	0.090435	-0.847016	0.098988		0.067137	0.079087	-0.425787	0.08887
5	351-364	YAWNRKRISNCVAD	13	2.55566	0.119628	3.16415	0.110543	3.1983	0.01333		-0.443116	0.141213	-0.212127	0.18709	0.609946	0.029378		-0.332079	0.135885	0.013889	0.112703	1.06391	0.045309		-0.907901	0.138276	-1.04836	0.114551	-0.01407	0.123277		-0.645437	0.241247	-0.270996	0.139609	0.155057	0.103533		-0.10146	0.157999	0.237011	0.199822	0.418804	0.13249		-0.116726	0.186136	0.093964	0.158055
6	374-387	FSTFKCYGVSPTKL	12	3.92964	0.121772	4.42603	0.155304	4.65324	0.214261		0.07703	0.146567	-0.366778	0.237695	-0.451716	0.242595		-2.75488	0.124747	-2.24846	0.161305	-1.31759	0.215189		-2.75258	0.12913	-3.02592	0.16009	-2.45901	0.278138		-0.300712	0.144528	-0.628413	0.211384	-0.842125	0.216256		-0.265235	0.192638	-0.59566	0.163799	-0.716558	0.229137		-0.367606	0.185486	-0.694953	0.201116
7	375-387	STFKCYGVSPTKL	11	3.5066	0.1323	3.99523	0.056951	4.21416	0.146916		0.107749	0.144466	-0.239181	0.120173	-0.250438	0.189626		-2.67174	0.163497	-2.11366	0.111668	-1.05343	0.16006		-2.70736	0.164637	-2.86896	0.083908	-2.00706	0.206667		0.037758	0.140714	-0.276327	0.14635	-0.387961	0.151783		-0.021629	0.208074	-0.30863	0.127144	-0.307004	0.153269		0.110897	0.199803	-0.306049	0.115604
8	378-387	KCYGVSPTKL	8	3.01629	0.085458	3.22709	0.157704	3.18738	0.02069		0.068072	0.102015	-0.14226	0.179257	-0.076922	0.033565		-2.30875	0.114012	-1.60584	0.173816	-0.522008	0.094957		-2.39063	0.112099	-2.31832	0.158908	-1.43049	0.16651		0.001412	0.125885	-0.208108	0.171608	-0.20939	0.09372		0.059012	0.105247	-0.031108	0.172545	-0.106711	0.082666		-0.025778	0.123336	-0.118315	0.184116
9	388-395	NDLCFTNV	7	2.00176	0.030192	2.93703	0.062835	2.97549	0.119353		-0.514643	0.056515	-0.418157	0.126904	-0.200582	0.126784		-0.359774	0.038948	-0.489372	0.085705	-0.226043	0.121357		-0.503997	0.062518	-0.557572	0.082491	-0.344296	0.12695		0.105035	0.068311	-0.177244	0.086934	-0.189703	0.124649		0.146369	0.038188	-0.096646	0.073868	-0.171676	0.131933		0.106709	0.130082	-0.112658	0.070086
10	392-399	FTNVYADS	7	0.470899	0.039936	1.32771	0.035976	2.01555	0.038377		0.035857	0.052699	-0.096749	0.060065	-0.464219	0.05645		-0.003018	0.054988	-0.328058	0.052513	-0.449409	0.11086		0.00884	0.058417	-0.214185	0.050329	-0.611712	0.095372		0.054181	0.05701	-0.113069	0.049778	-0.293893	0.067595		0.06474	0.054758	-0.217745	0.060761	-0.651943	0.051518		0.060113	0.054819	-0.1516	0.049666
11	392-400	FTNVYADSF	8	0.512217	0.091135	1.12896	0.131908	2.00274	0.227229		-0.067161	0.124158	-0.050432	0.159184	-0.726138	0.281821		-0.016885	0.131479	-0.160076	0.155725	-0.246285	0.325438		-0.154792	0.125417	-0.149592	0.164288	-0.903228	0.232888		-0.083696	0.0995	-0.14869	0.252899	-0.294306	0.287117		-0.126027	0.145029	-0.057253	0.1801	-0.823446	0.236841		-0.154269	0.124692	-0.162045	0.157435
12	393-399	TNVYADS	6	0.447512	0.019664	1.22531	0.028129	1.88792	0.018738		0.054752	0.026703	-0.065408	0.058769	-0.434712	0.030444		-0.00025	0.040376	-0.331982	0.034283	-0.426007	0.181673		0.029176	0.033369	-0.188999	0.036015	-0.591146	0.038655		0.059421	0.039771	-0.084084	0.03398	-0.233437	0.048721		0.079037	0.031648	-0.23386	0.03349	-0.617056	0.028934		0.070216	0.033159	-0.140943	0.042772
13	393-400	TNVYADSF	7	0.453363	0.026115	1.16823	0.042913	1.96853	0.021139		0.059972	0.034327	-0.202823	0.066983	-0.705361	0.042659		-0.060489	0.034748	-0.46529	0.048205	-0.786871	0.216388		-0.025343	0.046385	-0.275494	0.052167	-0.838528	0.050497		-0.013298	0.04352	-0.208289	0.051048	-0.488084	0.070231		0.002784	0.037842	-0.410621	0.054866	-0.963033	0.029923		0.00355	0.033875	-0.260957	0.050589
14	400-406	FVIRGDE	6	0.21047	0.022026	0.393161	0.011714	0.908518	0.009039		-0.020676	0.033103	-0.04903	0.060208	-0.213479	0.021555		-0.069224	0.039143	-0.16102	0.022081	-0.258612	0.112242		-0.081652	0.028426	-0.156735	0.019131	-0.425186	0.048239		-0.065331	0.032278	-0.146119	0.021277	-0.213527	0.053344		-0.134332	0.031639	-0.363909	0.022564	-0.679002	0.025365		-0.090772	0.025337	-0.206597	0.014102
15	400-407	FVIRGDEV	7	0.322473	0.024236	0.860902	0.031333	1.60535	0.08594		0.199481	0.034197	0.062057	0.039545	-0.078179	0.100239		-0.018081	0.03769	-0.105086	0.055341	-0.215084	0.258532		-0.01836	0.04069	-0.246818	0.044038	-0.331788	0.091942		-0.030039	0.055968	-0.241523	0.043881	-0.190787	0.131229		-0.027306	0.053306	-0.406223	0.091543	-0.590537	0.104467		0.046517	0.039105	-0.166771	0.039917
16	400-420	FVIRGDEVRQIAPGQTGKIAD	19	3.36488	0.059758	5.40161	0.037941	7.51076	0.109127		0.273843	0.079487	-0.421782	0.127368	-0.657505	0.157746		-0.056535	0.06325	-0.715057	0.081459	-0.721623	0.203113		-0.142148	0.089543	-1.06627	0.081049	-1.33662	0.150574		-0.103456	0.086447	-0.955677	0.051957	-0.820507	0.231127		-0.785325	0.063836	-2.0007	0.068636	-2.54093	0.118972		0.135047	0.084598	-1.03741	0.042121
17	400-421	FVIRGDEVRQIAPGQTGKIADY	20	3.31089	0.0339	5.35521	0.056215	7.84259	0.054739		0.242556	0.056699	-0.490845	0.155832	-0.769245	0.164324		-0.18011	0.04271	-0.795559	0.084479	-0.823609	0.366634		-0.18688	0.088572	-1.13621	0.064971	-1.62367	0.205751		-0.27856	0.090173	-1.00284	0.060306	-1.02793	0.150616		-0.963779	0.043906	-2.11356	0.083301	-3.07103	0.065406		-0.056345	0.087291	-1.20586	0.078112
18	401-420	VIRGDEVRQIAPGQTGKIAD	18	3.47116	0.019913	5.47734	0.039531	7.48971	0.092495		0.310742	0.051454	-0.472406	0.126266	-0.712635	0.151423		-0.148621	0.025035	-0.663442	0.058099	-0.759421	0.243032		-0.187196	0.03952	-1.09918	0.074903	-1.2384	0.161935		-0.179706	0.072749	-0.972179	0.044895	-0.875576	0.19938		-0.950493	0.032788	-2.08189	0.100515	-2.43936	0.106391		0.008714	0.067717	-1.10512	0.047884
19	401-421	VIRGDEVRQIAPGQTGKIADY	19	3.36747	0.031427	5.49184	0.066729	7.67924	0.09001		0.322811	0.106513	-0.427031	0.146322	-0.689785	0.150545		-0.135178	0.065946	-0.768657	0.072964	-0.613445	0.184126		-0.170909	0.069398	-1.15449	0.103659	-1.1326	0.094725		-0.09184	0.043112	-1.05277	0.073627	-0.835061	0.233288		-0.857007	0.052416	-2.11429	0.072964	-2.71604	0.122845		0.059142	0.065699	-1.20205	0.073621
20	407-420	VRQIAPGQTGKIAD	12	2.41407	0.019885	3.68785	0.048724	4.94095	0.048146		0.317065	0.052552	-0.288208	0.119107	-0.438673	0.083688		-0.017975	0.050946	-0.45197	0.054217	-0.497819	0.128356		-0.052441	0.070153	-0.650988	0.076723	-0.840176	0.111975		-0.093155	0.076798	-0.514509	0.049931	-0.615323	0.183194		-0.725262	0.039376	-1.34373	0.049949	-1.75686	0.0595		0.09211	0.049121	-0.804234	0.105873
21	407-421	VRQIAPGQTGKIADY	13	2.24446	0.037271	3.64248	0.049381	5.16146	0.036593		0.239809	0.073313	-0.416329	0.136069	-0.577025	0.081206		-0.08252	0.042939	-0.648579	0.074461	-0.689838	0.127188		-0.136589	0.057095	-0.792123	0.061826	-1.06889	0.117897		-0.271583	0.076377	-0.700189	0.053147	-0.779107	0.105069		-0.7839	0.041567	-1.60157	0.092343	-2.23562	0.068073		0.032751	0.05941	-0.945693	0.051543
22	407-422	VRQIAPGQTGKIADYN	14	2.4127	0.035618	3.96652	0.066002	5.63477	0.093529		0.324511	0.106415	-0.402384	0.135489	-0.524685	0.12337		-0.102276	0.061731	-0.651753	0.080522	-0.689849	0.195965		-0.22622	0.044092	-0.822482	0.070935	-1.04402	0.142922		-0.108626	0.095688	-0.678226	0.071995	-0.735384	0.218851		-0.808889	0.049226	-1.74397	0.074295	-2.45972	0.106328		0.02874	0.071944	-1.03282	0.078459
23	411-420	APGQTGKIAD	8	2.86268	0.008833	2.87988	0.046073	2.78677	0.018935		-1.68442	0.074034	-0.337572	0.0901	-0.055405	0.104622		-0.096965	0.036495	-0.073409	0.047812	-0.022721	0.034679		-0.092672	0.011293	-0.120516	0.068739	-0.009905	0.03848		-0.054041	0.019461	-0.090676	0.048894	-0.018982	0.022173		0.09533	0.058066	-0.018736	0.046688	0.038542	0.036193		-0.082524	0.05636	-0.134831	0.052668
24	421-431	YNYKLPDDFTG	9	1.04178	0.038275	1.49392	0.086918	2.72343	0.10941		0.09498	0.073735	-0.073101	0.10085	-0.18416	0.120992		-0.046327	0.059204	-0.212262	0.103871	-0.508018	0.113187		-0.253521	0.045703	-0.280058	0.097302	-0.697089	0.153996		-0.014556	0.068541	-0.2431	0.094211	-0.476036	0.168949		-0.112624	0.060559	-0.487514	0.095018	-1.28939	0.198726		-0.005111	0.073314	-0.37345	0.09955
25	422-431	NYKLPDDFTG	8	0.95256	0.049463	1.24261	0.03476	2.13082	0.066026		0.033993	0.051897	-0.030432	0.039774	-0.116402	0.068437		-0.050732	0.055543	-0.111431	0.047753	-0.343421	0.091275		-0.305071	0.051897	-0.193211	0.045811	-0.583387	0.077225		-0.060242	0.051928	-0.127193	0.05027	-0.308381	0.120908		-0.074616	0.056004	-0.313616	0.055214	-0.886051	0.074812		-0.051041	0.052027	-0.29105	0.041611
26	423-429	YKLPDDF	5	0.527012	0.029392	0.654391	0.006889	1.1282	0.116077		-0.006674	0.065141	-0.089107	0.021439	-0.177894	0.117112		-0.083611	0.037251	-0.147994	0.055877	-0.256043	0.127378		-0.298207	0.03446	-0.141597	0.014142	-0.361177	0.118343		-0.054335	0.033992	-0.116886	0.01293	-0.295605	0.126234		-0.102886	0.032692	-0.182466	0.022556	-0.574372	0.116351		-0.065285	0.046788	-0.140698	0.009912
27	423-431	YKLPDDFTG	7	0.854798	0.031459	0.995966	0.045944	1.59304	0.05784		0.0617	0.05248	-0.019916	0.052846	-0.099946	0.063301		-0.080942	0.042134	-0.133565	0.052487	-0.363492	0.076784		-0.267464	0.045	-0.143147	0.054358	-0.464603	0.085246		-0.054801	0.05186	-0.114609	0.05544	-0.296765	0.095718		-0.060685	0.049921	-0.141999	0.053586	-0.476852	0.065108		-0.031807	0.059373	-0.136184	0.059042
28	423-441	YKLPDDFTGCVIAWNSNNL	17	2.67929	0.166041	2.88115	0.045981	3.86095	0.100362		0.172471	0.172127	0.065453	0.069313	-0.66521	0.179827		-0.43365	0.185624	-0.348131	0.079508	-0.211866	0.103775		-0.650961	0.17627	-0.660548	0.10245	-1.34269	0.15744		-0.639586	0.212699	-0.763302	0.108635	-1.34433	0.161294		-0.553302	0.235777	-0.88127	0.089706	-1.22356	0.162686		-0.216038	0.170802	-0.825342	0.083545
29	432-441	CVIAWNSNNL	9	1.92206	0.145489	2.14496	0.082191	2.37549	0.128644		0.050021	0.177989	-0.279838	0.128805	-0.317535	0.140463		-0.116558	0.156378	-0.141437	0.096561	0.113286	0.130203		-0.094077	0.157276	-0.277998	0.117787	-0.498512	0.146313		-0.132207	0.184493	-0.247629	0.114792	-0.345792	0.138203		-0.213822	0.161021	-0.300235	0.092174	-0.439016	0.140536		-0.112816	0.203258	-0.272073	0.106419
30	432-443	CVIAWNSNNLDS	11	2.38112	0.159924	2.52406	0.147356	2.88485	0.141442		0.095718	0.16214	-0.05446	0.200549	-0.329656	0.15118		-0.048694	0.179127	0.086192	0.157064	0.189469	0.146358		-0.067274	0.196017	-0.1388	0.188834	-0.487167	0.176952		-0.107265	0.189585	-0.160414	0.21042	-0.355721	0.177488		-0.325573	0.174821	-0.210257	0.151654	-0.555476	0.215631		-0.084109	0.178909	-0.107751	0.168183
31	432-449	CVIAWNSNNLDSKVGGNY	17	5.32503	0.098649	5.51487	0.106621	5.93609	0.13229		0.679347	0.1397	0.633131	0.238433	0.049075	0.24415		0.629351	0.174404	1.1489	0.212508	0.84795	0.198606		-0.372391	0.160476	-0.276554	0.161307	-0.805899	0.220337		-0.346837	0.143386	-0.192674	0.121307	-0.345267	0.216427		0.698402	0.116195	1.34601	0.118892	0.819439	0.160372		0.443505	0.130684	0.921847	0.187879
32	434-441	IAWNSNNL	7	2.06047	0.128463	2.07784	0.165052	2.16533	0.134397		-0.00391	0.166985	-0.175833	0.177365	-0.248379	0.135944		-0.205264	0.13067	-0.214931	0.173949	-0.21938	0.136777		-0.200777	0.143693	-0.105247	0.181172	-0.20145	0.151571		-0.219901	0.132205	-0.090142	0.167732	-0.220266	0.149083		-0.232402	0.147853	-0.068748	0.190986	-0.295825	0.141459		-0.138392	0.178439	-0.107046	0.169768
33	442-449	DSKVGGNY	7	2.56949	0.102126	2.5424	0.110092	2.48904	0.04109		0.05946	0.102898	-0.079565	0.137226	-0.095455	0.089686		-0.089216	0.105371	-0.086485	0.127414	-0.029144	0.053777		-0.079249	0.103613	-0.076683	0.130794	-0.055623	0.065156		-0.122213	0.103627	-0.053546	0.125388	-0.065339	0.069611		-0.01076	0.1071	-0.176945	0.118502	0.022297	0.055774		-0.027782	0.156101	-0.114347	0.115205
34	442-455	DSKVGGNYNYRYRL	13	4.03952	0.224119	5.05398	0.190419	5.90775	0.12048		0.288163	0.233858	0.092873	0.260956	-0.0615	0.12681		0.071379	0.235921	-0.033574	0.227766	0.161274	0.134895		0.036926	0.250462	-0.319948	0.258117	-0.158983	0.169246		-0.175555	0.235136	-0.583842	0.204142	-0.430647	0.178379		0.009804	0.23476	-0.882854	0.222032	-1.35654	0.170175		-0.187802	0.259883	-0.93636	0.206375
35	444-455	KVGGNYNYRYRL	11	3.32933	0.121109	4.09578	0.177679	4.734	0.101611		-0.361052	0.216714	-0.120119	0.264904	-0.014686	0.105618		-0.271703	0.19094	-0.335622	0.19848	0.061763	0.141504		0.101335	0.128931	-0.019661	0.181935	0.153279	0.104017		-0.429513	0.135572	-0.821144	0.178819	-0.210791	0.182673		-0.288137	0.133583	-1.0418	0.183207	-1.34941	0.150216		-0.563028	0.178628	-1.04878	0.291527
36	456-467	FRKSNLKPFERD	10	1.02323	0.02721	2.47086	0.174848	2.80869	0.15296		0.232442	0.062542	-0.010025	0.188752	0.066568	0.153621		-0.041108	0.055124	-0.182071	0.181601	0.010058	0.152984		-0.063517	0.054644	-0.205484	0.181538	0.081051	0.158389		-0.036697	0.060262	-0.408183	0.175694	-0.024254	0.159579		-0.211553	0.040173	-1.22894	0.176048	-0.662154	0.164909		-0.050646	0.058334	-0.618884	0.17602
37	456-470	FRKSNLKPFERDIST	13	2.72005	0.030096	4.42313	0.109021	4.81868	0.094402		0.268585	0.059259	-0.166053	0.12633	-0.202697	0.12449		0.011438	0.062456	-0.33158	0.111691	-0.133262	0.10635		-0.021315	0.06657	-0.409739	0.148134	-0.139991	0.114635		-0.060833	0.0764	-0.496496	0.109754	-0.237013	0.125146		-0.258019	0.041993	-1.38126	0.110267	-0.903353	0.116636		-0.123706	0.1046	-0.921737	0.129452
38	456-471	FRKSNLKPFERDISTE	14	3.26233	0.042701	5.08495	0.113277	5.52303	0.092606		0.230416	0.079913	-0.335545	0.12686	-0.339544	0.141376		-0.101334	0.07297	-0.433364	0.117033	-0.245723	0.102009		-0.101928	0.088845	-0.546215	0.160532	-0.288855	0.117917		-0.103435	0.085465	-0.646613	0.117149	-0.359259	0.125033		-0.369558	0.080286	-1.5776	0.11474	-1.15519	0.111745		-0.13512	0.122995	-1.03202	0.126411
39	471-486	EIYQAGSKPCNGVEGF	14	4.65455	0.046167	4.6084	0.06387	4.45497	0.045643		-0.164973	0.094022	-0.512827	0.07614	-0.403775	0.194049		-0.628511	0.078031	-0.548773	0.08341	-0.498778	0.081379		-0.460625	0.07794	-0.451208	0.139787	-0.335636	0.062106		-0.558292	0.059574	-0.432801	0.073262	-0.412533	0.070632		-1.16123	0.057832	-0.507896	0.10102	-0.61922	0.053878		-0.784573	0.178219	-0.503033	0.074112
40	472-487	IYQAGSKPCNGVEGFN	14	5.20759	0.06107	5.21891	0.118836	5.04099	0.044329		-0.067969	0.098474	-0.504105	0.128217	-0.51554	0.165486		-0.551532	0.101797	-0.47615	0.142696	-0.444475	0.103753		-0.411459	0.077262	-0.494857	0.146992	-0.338119	0.070966		-0.434837	0.07506	-0.433595	0.122774	-0.414509	0.076559		-0.908779	0.103254	-0.636729	0.126124	-0.501338	0.127122		-0.540527	0.155413	-0.459467	0.127096
41	487-494	NCYFPLQS	6	1.87924	0.046327	2.65141	0.044367	2.78209	0.019216		0.192149	0.046379	-0.104146	0.05162	-0.085506	0.069839		0.098903	0.046622	-0.157174	0.048715	-0.101892	0.053252		0.097591	0.068074	-0.186603	0.05549	-0.088438	0.019796		-0.125478	0.061585	-0.300644	0.045669	-0.137109	0.040532		-0.568997	0.049342	-0.728213	0.06962	-0.500763	0.022074		-0.454227	0.073537	-0.621741	0.061347
42	487-495	NCYFPLQSY	7	2.13761	0.019495	3.20392	0.07244	3.29021	0.029091		0.320842	0.02315	-0.234394	0.082068	-0.210391	0.114595		0.102711	0.042085	-0.231612	0.080824	-0.222932	0.067607		0.100551	0.072485	-0.245971	0.100318	-0.143539	0.033263		-0.226836	0.048289	-0.33675	0.076301	-0.219588	0.082865		-0.795626	0.03618	-0.99025	0.076366	-0.523975	0.048075		-0.622891	0.058804	-0.740139	0.099728
43	488-494	CYFPLQS	5	1.39765	0.041601	2.14369	0.042401	2.31705	0.033534		0.081107	0.044765	-0.109765	0.057054	-0.129637	0.085893		0.143674	0.074375	-0.100788	0.06985	-0.104917	0.059914		0.115341	0.047158	-0.194574	0.058268	-0.068286	0.056777		-0.034751	0.075238	-0.258541	0.055974	-0.153297	0.056076		-0.322253	0.065488	-0.756313	0.056986	-0.498309	0.045243		-0.316816	0.065282	-0.647666	0.063343
44	488-495	CYFPLQSY	6	1.58306	0.063747	2.73505	0.071765	2.79615	0.03824		0.433365	0.070696	-0.18553	0.084254	-0.166725	0.062224		0.199203	0.086432	-0.233718	0.098902	-0.199169	0.095407		0.174858	0.131453	-0.257902	0.091053	-0.141392	0.080517		-0.149839	0.090653	-0.327306	0.086637	-0.270342	0.060993		-0.452254	0.076432	-0.909546	0.081993	-0.537804	0.094676		-0.401581	0.08465	-0.823155	0.102473
45	491-510	PLQSYGFQPTNGVGYQPYRV	16	5.30018	0.050892	5.9208	0.068603	6.20702	0.123186		-0.041844	0.071869	-0.450739	0.081744	-0.664912	0.184813		-0.402145	0.064801	-0.513202	0.202306	-0.774348	0.210228		-0.259462	0.066635	-0.392415	0.106138	-0.576825	0.135852		-0.843426	0.082227	-0.540144	0.09531	-0.571405	0.149307		-0.799357	0.114289	-0.627655	0.199235	-0.901797	0.13444		-0.240624	0.058182	-0.602536	0.078062
46	491-512	PLQSYGFQPTNGVGYQPYRVVV	18	5.49945	0.091593	6.18013	0.193265	6.53245	0.125828		0.123458	0.092006	-0.522177	0.229994	-0.622854	0.190618		-0.329738	0.093273	-0.519774	0.197801	-0.57984	0.227815		-0.237554	0.10857	-0.592952	0.213865	-0.837142	0.130612		-0.93595	0.095817	-0.704689	0.203995	-0.634659	0.178809		-0.784415	0.097942	-0.889954	0.20555	-1.27077	0.134225		-0.382656	0.20804	-0.87157	0.195322
47	491-513	PLQSYGFQPTNGVGYQPYRVVVL	19	5.11637	0.072102	5.79873	0.139583	6.33434	0.047576		0.249585	0.09618	-0.337151	0.180546	-0.771507	0.171721		-0.330065	0.137079	-0.783899	0.174024	-0.833572	0.197032		-0.274143	0.115642	-0.441294	0.200184	-0.889981	0.108644		-0.884554	0.152836	-0.81375	0.191965	-0.858557	0.142189		-0.819246	0.085407	-1.00629	0.167872	-1.49493	0.083729		-0.165498	0.223452	-0.939109	0.204864
48	495-510	YGFQPTNGVGYQPYRV	13	4.1253	0.046877	4.19415	0.082176	4.44278	0.043038		-0.119674	0.068554	-0.416051	0.091749	-0.533376	0.108895		-0.323679	0.07271	-0.339142	0.091881	-0.583424	0.228931		-0.218668	0.068271	-0.292408	0.119877	-0.582887	0.061142		-0.680672	0.064512	-0.290283	0.090537	-0.379227	0.112213		-0.583717	0.069806	-0.374496	0.12762	-0.774958	0.084103		-0.225186	0.15136	-0.345015	0.092506
49	495-512	YGFQPTNGVGYQPYRVVV	15	3.95286	0.0231	4.10939	0.073293	4.42657	0.027032		-0.031176	0.045244	-0.373671	0.102023	-0.58389	0.085517		-0.233609	0.041583	-0.307757	0.080649	-0.501656	0.169254		-0.163605	0.049087	-0.351378	0.11715	-0.692248	0.05538		-0.617982	0.037723	-0.36441	0.08345	-0.478264	0.082098		-0.467842	0.037817	-0.361613	0.080464	-0.868688	0.042337		-0.163454	0.155076	-0.403966	0.080158
50	495-513	YGFQPTNGVGYQPYRVVVL	16	3.98593	0.042876	4.13615	0.086197	4.51766	0.046621		0.033637	0.047209	-0.300338	0.13612	-0.533435	0.085967		-0.207058	0.046986	-0.279436	0.098023	-0.6541	0.191499		-0.138091	0.052799	-0.307462	0.10167	-0.729631	0.052401		-0.652834	0.047955	-0.358026	0.088984	-0.479492	0.119789		-0.421962	0.047465	-0.337056	0.091564	-0.81207	0.083997		-0.153696	0.153863	-0.398424	0.095412
51	497-512	FQPTNGVGYQPYRVVV	13	3.47798	0.036445	3.6145	0.067935	3.90322	0.051639		-0.251878	0.043763	-0.319179	0.127548	-0.355916	0.13639		-0.678125	0.056333	-0.188422	0.129735	-0.327793	0.100591		-0.716944	0.064631	-0.24546	0.072516	-0.468076	0.092431		-0.588383	0.060281	-0.291399	0.082312	-0.325003	0.133419		-0.611638	0.133236	-0.035046	0.094891	-0.344689	0.075869		-0.679721	0.073697	-0.297381	0.117161
52	503-512	VGYQPYRVVV	8	1.00144	0.022672	1.08104	0.02872	1.47593	0.013997		-0.043652	0.049971	-0.132288	0.051902	-0.379502	0.050419		-0.151569	0.028539	-0.2565	0.038692	-0.499836	0.081381		-0.146033	0.049005	-0.157954	0.061776	-0.515639	0.027467		-0.245259	0.056914	-0.117414	0.048349	-0.306496	0.076496		-0.560552	0.055123	-0.48529	0.059749	-0.864924	0.095344		-0.105303	0.04483	-0.154529	0.039751
53	514-533	SFELLHAPATVCGPKKSTNL	17	4.89257	0.036042	4.94861	0.072277	4.84705	0.064706		-0.797986	0.134433	-0.564746	0.093649	-0.530534	0.139158		-0.656718	0.075605	-0.517217	0.092586	-0.566873	0.138687		-1.15745	0.07319	-0.554036	0.114474	-0.496945	0.077546		-0.35556	0.075088	-0.448182	0.080121	-0.455395	0.079734		-0.615856	0.064226	-0.80883	0.097557	-0.7568	0.090657		-0.236631	0.138666	-0.452502	0.084535
54	515-533	FELLHAPATVCGPKKSTNL	16	4.69448	0.078634	4.67214	0.093831	4.62287	0.033753		-0.714794	0.211216	-0.581682	0.106955	-0.572498	0.1143		-0.701361	0.112239	-0.441216	0.119365	-0.622108	0.088413		-1.05941	0.084777	-0.379588	0.162702	-0.325577	0.052477		-0.365723	0.093863	-0.381557	0.102895	-0.475764	0.062202		-0.502914	0.083647	-0.27142	0.13217	-0.574211	0.06851		-0.276859	0.148025	-0.350206	0.10137
55	516-541	ELLHAPATVCGPKKSTNLVKNKCVNF	23	7.71551	0.108855	7.80142	0.095472	7.61175	0.127333		-2.81793	0.185145	-1.28739	0.174724	-0.683317	0.202977		-0.974337	0.144732	-0.806837	0.130904	-0.670088	0.155647		-1.17377	0.13914	-0.675712	0.172903	-0.545436	0.143403		-0.626247	0.131127	-0.692001	0.111793	-0.74448	0.149992		-0.856481	0.137139	-0.739968	0.135127	-1.15036	0.14277		-0.467358	0.274792	-0.777496	0.127596
56	521-533	PATVCGPKKSTNL	10	3.15381	0.010369	3.18443	0.010369	3.13775	0.048935		-0.497836	0.117656	-0.604635	0.152062	-0.402119	0.050022		-0.545467	0.014664	-0.212678	0.227838	-0.378029	0.050022		-0.767125	0.04878	-0.326734	0.087692	-0.329503	0.081204		-0.181914	0.038163	-0.290922	0.033871	-0.33664	0.066049		-0.33199	0.04601	-0.346386	0.100802	-0.473969	0.054415		-0.247055	0.199534	-0.258714	0.053847
57	522-533	ATVCGPKKSTNL	10	3.1322	0.032768	3.17404	0.080852	3.03468	0.077654		-0.472104	0.143522	-0.537331	0.132107	-0.31267	0.082038		-0.483275	0.05551	-0.38065	0.11124	-0.297256	0.095402		-0.736035	0.040851	-0.35612	0.090186	-0.21271	0.096493		-0.197721	0.03285	-0.330145	0.087447	-0.203925	0.085757		-0.409452	0.067483	-0.274848	0.083565	-0.441796	0.086043		-0.173885	0.128638	-0.378421	0.091669
58	523-533	TVCGPKKSTNL	9	2.91655	0.044006	2.92386	0.015023	2.89023	0.07968		-0.304911	0.044989	-0.430089	0.039878	-0.362217	0.107591		-0.548479	0.067956	-0.365091	0.051759	-0.399631	0.08778		-0.741633	0.045365	-0.369827	0.082571	-0.231496	0.082016		-0.296892	0.050652	-0.286834	0.023562	-0.383549	0.086821		-0.487297	0.080256	-0.385218	0.027727	-0.549628	0.082254		-0.270403	0.111901	-0.391365	0.02382
59	533-541	LVKNKCVNF	8	2.92046	0.096663	2.90246	0.146938	2.84427	0.144972		-1.55298	0.121398	-0.531966	0.269549	-0.209331	0.225049		-0.229997	0.154756	-0.197242	0.225744	-0.085614	0.17317		-0.07427	0.231917	-0.104516	0.209982	-0.107804	0.194133		-0.224922	0.138171	-0.120762	0.199225	-0.097768	0.227572		-0.253582	0.212807	-0.089227	0.179386	0.010586	0.319869		-0.17658	0.169109	-0.172347	0.212597
60	534-541	VKNKCVNF	7	2.12191	0.070814	2.14285	0.064139	2.09071	0.041783		-1.27312	0.075982	-0.514236	0.138674	-0.063773	0.064498		-0.157327	0.091218	-0.079544	0.071118	-0.01383	0.047445		n.a.	n.a.	-0.225175	0.067255	0.01032	0.046489		-0.1755	0.075809	-0.145499	0.094135	-0.169053	0.053212		-0.12104	0.092478	-0.043418	0.083919	-0.08667	0.046426		-0.118453	0.132189	-0.11454	0.089056
61	542-549	NFNGLTGT	7	2.85727	0.028681	2.81656	0.166535	2.66594	0.120304		-1.2727	0.032613	-0.508393	0.185177	-0.116092	0.124559		-0.053024	0.035446	0.112808	0.183592	0.099708	0.129379		-0.31947	0.066542	-0.221987	0.179388	-0.026367	0.125479		-0.223973	0.033171	-0.085717	0.188976	-0.061672	0.184868		-0.287658	0.101545	-0.298946	0.34004	0.078317	0.147251		-0.259518	0.030859	-0.35438	0.221189
62	542-552	NFNGLTGTGVL	10	3.48666	0.034642	3.47082	0.070638	3.35498	0.053182		-2.14022	0.056832	-1.12958	0.193858	-0.35049	0.132452		-0.401545	0.06463	-0.348722	0.098021	-0.327087	0.071764		-0.326581	0.056725	-0.347419	0.098351	-0.241622	0.059978		-0.321696	0.044401	-0.358263	0.070877	-0.339627	0.0716		-0.425569	0.040273	-0.306767	0.087595	-0.417801	0.061008		-0.309324	0.096885	-0.357095	0.077284
63	544-552	NGLTGTGVL	8	2.70976	0.035574	2.71919	0.066883	2.62426	0.042972		-1.85717	0.045915	-0.890588	0.232026	-0.241321	0.089295		-0.286713	0.046718	-0.258157	0.083739	-0.211024	0.068577		-0.189364	0.056872	-0.198439	0.080835	-0.12268	0.055916		-0.15813	0.054274	-0.219892	0.074372	-0.162359	0.058903		-0.321508	0.048631	-0.462975	0.074934	-0.250089	0.071534		-0.201893	0.099442	-0.246272	0.072905
64	553-564	TESNKKFLPFQQ	10	3.81821	0.027277	3.7907	0.095451	3.70424	0.073671		-1.30752	0.068011	-0.623335	0.144689	-0.101059	0.096705		0.001297	0.091266	0.169542	0.100697	0.534872	0.19205		-0.088243	0.037997	-0.073065	0.127632	-0.053975	0.075546		-0.088452	0.076743	-0.131817	0.105465	-0.033632	0.075483		-0.241385	0.064294	0.005945	0.132664	-0.105227	0.075279		-0.019351	0.094362	-0.114963	0.104688
65	553-565	TESNKKFLPFQQF	11	3.84865	0.022606	3.84429	0.082213	3.71202	0.032738		-1.31266	0.075355	-0.622772	0.11387	-0.191397	0.11974		-0.214155	0.04645	-0.178312	0.088037	-0.13683	0.040645		-0.149116	0.036664	-0.168857	0.100702	-0.078126	0.039528		-0.170427	0.043019	-0.184733	0.083971	-0.133904	0.05679		-0.20357	0.030257	-0.159713	0.094282	-0.147435	0.033491		-0.104469	0.113371	-0.203631	0.082763
66	553-568	TESNKKFLPFQQFGRD	14	4.50409	0.018706	4.4879	0.092809	4.39012	0.032616		-1.72229	0.100558	-0.846063	0.152516	-0.312873	0.150748		-0.312908	0.069077	-0.203566	0.120368	-0.342498	0.066316		-0.259734	0.051064	-0.273162	0.123267	-0.19324	0.047069		-0.276253	0.031451	-0.25379	0.135617	-0.167014	0.058747		-0.198015	0.037365	-0.169887	0.112306	-0.245145	0.072611		-0.113099	0.106316	-0.291658	0.096477
67	561-568	PFQQFGRD	6	2.30081	0.033371	2.36105	0.09357	2.31549	0.069684		-0.96078	0.04421	-0.485281	0.107292	-0.106709	0.121675		-0.18275	0.064382	-0.263871	0.104629	-0.187189	0.148358		-0.094094	0.06172	-0.199324	0.097158	-0.184095	0.076063		-0.078354	0.043869	-0.236604	0.09779	-0.240328	0.076219		0.045645	0.092931	-0.420265	0.108152	0.06041	0.086817		-0.131624	0.100065	-0.2558	0.122607
68	569-575	IADTTDA	6	1.65312	0.025394	1.63901	0.056747	1.58049	0.019372		-0.256822	0.03157	-0.162976	0.089119	-0.065477	0.066685		-0.064311	0.050427	-0.07833	0.058416	-0.043809	0.024192		-0.095653	0.033069	-0.124957	0.068698	-0.094285	0.033164		-0.103575	0.033851	-0.006666	0.069942	0.053033	0.024104		-0.141637	0.030003	-0.124752	0.06259	-0.082496	0.024257		-0.187552	0.033114	-0.142061	0.061627
69	569-581	IADTTDAVRDPQT	11	4.50761	0.048639	4.53948	0.114476	4.43158	0.056675		-2.30755	0.052958	-0.800352	0.267805	-0.292305	0.172876		-0.199972	0.053907	-0.233601	0.120918	-0.179272	0.071558		-0.148456	0.057372	-0.203132	0.168322	-0.181828	0.087155		-0.193168	0.056472	-0.215855	0.123776	-0.197028	0.103586		-0.256817	0.055509	-0.208002	0.132363	-0.278797	0.0782		-0.169085	0.113995	-0.290859	0.118801
70	569-582	IADTTDAVRDPQTL	12	4.65555	0.063048	4.68034	0.102312	4.6614	0.023835		-2.40729	0.076907	-0.974564	0.151644	-0.340607	0.031918		-0.357488	0.070644	-0.3434	0.106523	-0.397748	0.038028		-0.323041	0.06771	-0.431822	0.11563	-0.341518	0.034546		-0.259999	0.077441	-0.250702	0.108903	-0.344309	0.042405		-0.368228	0.067709	-0.317299	0.10848	-0.428189	0.04437		-0.279084	0.132771	-0.391212	0.120181
71	569-583	IADTTDAVRDPQTLE	13	5.7522	0.014044	5.82118	0.104776	5.58218	0.021475		-3.01928	0.041054	-1.04508	0.241449	-0.274591	0.134093		-0.198559	0.034792	-0.341107	0.105687	-0.133134	0.025554		-0.224235	0.019725	-0.316402	0.125406	-0.21259	0.027544		-0.125552	0.019725	-0.264307	0.107843	-0.132594	0.067555		-0.288894	0.019781	-0.348119	0.12002	-0.252726	0.040306		-0.226525	0.019725	-0.401636	0.105718
72	575-582	AVRDPQTL	6	2.51978	0.023774	2.5302	0.066416	2.46533	0.014663		-1.41018	0.030966	-0.311988	0.106118	-0.088443	0.059013		-0.103129	0.030212	-0.102459	0.067836	-0.074464	0.030302		-0.093358	0.027472	-0.124383	0.075609	-0.079998	0.020401		-0.122988	0.031283	-0.11311	0.070593	-0.078017	0.035412		-0.133251	0.027836	-0.113223	0.069384	-0.094663	0.020092		-0.087461	0.065329	-0.127911	0.068408
73	575-583	AVRDPQTLE	7	3.45112	0.035586	3.46952	0.084285	3.40712	0.022076		-1.8813	0.047787	-0.471562	0.141479	-0.088807	0.088025		0.015189	0.117944	0.024296	0.0923	-0.036298	0.078127		-0.076466	0.044708	-0.141333	0.088229	-0.059211	0.048287		-0.11758	0.045528	-0.06164	0.09987	-0.086377	0.088342		0.167822	0.068226	0.076413	0.143577	0.343993	0.114929		-0.085744	0.057745	-0.190499	0.095213
74	576-582	VRDPQTL	5	1.92506	0.024907	1.92975	0.022161	1.88225	0.022567		-1.01099	0.035005	-0.10731	0.050923	-0.067616	0.04974		-0.030321	0.034209	n.a.	n.a.	-0.031041	0.032466		-0.057994	0.034624	-0.060283	0.037688	-0.044622	0.031782		-0.067889	0.03533	-0.06604	0.031976	-0.04671	0.036689		-0.090674	0.034088	-0.09653	0.036869	-0.096127	0.032255		-0.039118	0.04606	-0.109421	0.051567
75	576-584	VRDPQTLEI	7	3.2167	0.033222	3.18859	0.081143	3.19247	0.011958		-1.95623	0.034029	-0.400838	0.174901	-0.240443	0.06474		-0.270341	0.036282	-0.20818	0.115218	-0.175884	0.041492		-0.288567	0.138579	-0.122085	0.093615	-0.16975	0.022912		-0.204595	0.072013	-0.101156	0.083145	-0.153339	0.038131		-0.320636	0.038473	-0.278553	0.171551	-0.189383	0.017158		-0.135049	0.133107	-0.133512	0.089249
76	584-591	ILDITPCS	6	2.0744	0.028019	2.10336	0.056289	2.0592	0.020878		-1.10533	0.042523	-0.617709	0.181488	-0.151379	0.066307		-0.155291	0.030585	-0.146222	0.061309	-0.143234	0.032482		-0.200764	0.032346	-0.183701	0.06638	-0.159914	0.028842		-0.088567	0.030701	-0.136211	0.057323	-0.149294	0.028398		-0.140926	0.029591	-0.118	0.058025	-0.171137	0.024193		-0.094673	0.068624	-0.136902	0.057435
77	585-591	LDITPCS	5	2.25257	0.021497	2.26562	0.034194	2.22663	0.022716		-1.06033	0.033069	-0.54701	0.172689	-0.167238	0.06019		-0.090486	0.037696	-0.106146	0.045157	-0.078114	0.03798		-0.197797	0.040017	-0.166807	0.054079	-0.116421	0.043296		-0.127744	0.073486	-0.168249	0.039527	-0.141177	0.034057		-0.109389	0.043227	-0.168816	0.041211	-0.176336	0.029975		-0.112443	0.073036	-0.13536	0.045355
[truncated: 2 more columns]

## Sheet: RBD-Omicron1
Table: Deuterium exchange values for different pepsin-digested fragments of RBD(Omicron BA.1) variant in the presence or absence of different proteins. The values are an average of replicate measurements with standard deviation (SD) values indicated.
				Relative Uptake of peptides of RBD(O1) in apo state							RBD(O1):LSI-CoVA-014 complex minus RBD(O1)							RBD(O1):LSI-CoVA-015 complex minus RBD(O1)							RBD(O1):LSI-CoVA-016 complex minus RBD(O1)							RBD(O1):ACE2 complex minus RBD(O1)
				1 min		10 min		100 min			1 min		10 min		100 min			1 min		10 min		100 min			1 min		10 min		100 min			1 min		10 min		100 min
S.No.	Residue No.s	Sequence	MEA	Uptake (Da)	± SD	Uptake (Da)	± SD	Uptake (Da)	± SD		ΔHDX (D)	± SD	ΔHDX (D)	± SD	ΔHDX (D)	± SD		ΔHDX (D)	± SD	ΔHDX (D)	± SD	ΔHDX (D)	± SD		ΔHDX (D)	± SD	ΔHDX (D)	± SD	ΔHDX (D)	± SD		ΔHDX (D)	± SD	ΔHDX (D)	± SD	ΔHDX (D)	± SD
1	313-325	YFQSAARVQPTES	11	4.90131	0.022803	5.03329	0.069271	5.01566	0.086443		-0.164213	0.089591	-0.222659	0.1078	-0.034444	0.146739		-0.286205	0.252721	-0.195369	0.12632	0.026907	0.119107		0.060176	0.073576	-0.083075	0.072879	0.023232	0.098438		-0.178615	0.10486	-0.411607	0.076459	-0.296978	0.157811
2	320-332	VQPTESIVRFPNI	10	4.70911	0.127911	4.94138	0.061663	5.35378	0.053337		-0.665976	0.147715	-0.935954	0.07004	-1.15306	0.196095		-0.314142	0.136932	-0.074994	0.146516	-0.373682	0.249193		-0.108803	0.264666	0.214017	0.113437	-0.397586	0.287781		-0.202558	0.212759	-0.198536	0.06212	-0.585436	0.31355
3	329-342	FPNITNLCPFDEVF	11	2.39265	0.080813	3.01419	0.07722	3.01549	0.068625		0.149145	0.147886	-0.074965	0.092089	-0.12306	0.168148		-0.268194	0.097181	-0.275352	0.080774	0.388732	0.075756		-0.000326	0.09865	-0.153168	0.130957	-0.032342	0.106194		-0.00649	0.165717	-0.286826	0.097955	-0.14215	0.129374
4	333-343	TNLCPFDEVFN	9	1.08324	0.016834	1.56592	0.020311	2.62467	0.090994		0.012749	0.032876	-0.112307	0.0843	0.074611	0.15863		-0.385116	0.130206	0.013213	0.101605	0.251555	0.113693		-0.072619	0.024953	-0.008439	0.164075	-0.022297	0.118559		-0.145231	0.096474	-0.27615	0.026029	0.018985	0.192952
5	348-361	ASVYAWNRKRISNC	13	3.82081	0.153323	5.18138	0.347156	5.38052	0.156562		-0.754593	0.157738	-1.01888	0.351445	-1.09849	0.421522		-0.837725	0.207234	-0.565104	0.370867	-0.949669	0.193902		-1.00947	0.157108	-0.595335	0.35998	-0.324865	0.216609		-1.08689	0.160084	-2.09261	0.411834	-0.964812	0.163316
6	351-361	YAWNRKRISNC	10	2.24414	0.065856	2.61212	0.061549	2.65121	0.068197		-0.382088	0.19756	-0.713244	0.094078	-0.628652	0.23742		-0.617195	0.136352	-0.273929	0.101684	-0.367767	0.083934		-0.625566	0.095936	-0.431094	0.087381	-0.109933	0.070935		-0.443267	0.141961	-0.651433	0.112547	-0.212411	0.272826
7	351-364	YAWNRKRISNCVAD	13	1.81434	0.04478	2.26051	0.181262	2.41032	0.084323		-0.017964	0.094696	-0.472372	0.183651	-0.086085	0.098614		-0.247806	0.083385	-0.033552	0.187983	-0.039194	0.168076		-0.028994	0.299626	0.108472	0.183982	-0.12583	0.084557		0.103954	0.242826	-0.219445	0.181506	-0.089283	0.084557
8	352-361	AWNRKRISNC	9	2.21224	0.136895	2.5874	0.074539	2.65886	0.163435		-0.308127	0.321368	-0.436603	0.141468	-0.213683	0.221457		-0.341666	0.190628	-0.283064	0.111431	-0.261591	0.181979		-0.474137	0.154633	-0.331661	0.183115	-0.132087	0.197589		-0.200264	0.201499	-0.517335	0.088145	-0.105256	0.217632
9	369-375	YNLAPFF	5	1.47562	0.033009	1.64658	0.115353	1.56264	0.103207		0.319154	0.105867	0.093325	0.142936	0.088737	0.127272		0.262894	0.071569	0.130728	0.119258	0.260476	0.110145		0.294666	0.10123	0.096599	0.143317	0.245618	0.135163		0.431514	0.127797	0.250254	0.195863	0.436925	0.166553
10	369-376	YNLAPFFT	6	2.15044	0.049016	2.23949	0.085687	2.35044	0.119065		0.3936	0.076991	0.314355	0.092875	0.201019	0.135076		0.397653	0.074687	0.399464	0.089231	0.316936	0.127257		0.280844	0.305508	0.382297	0.141057	0.342967	0.168796		0.679853	0.18422	0.476153	0.174676	0.587138	0.205644
11	369-377	YNLAPFFTF	7	1.77463	0.05278	2.12251	0.11423	2.50479	0.130333		0.091227	0.087908	-0.035343	0.126331	-0.853455	0.157988		0.186699	0.149173	-0.10999	0.21014	-0.899208	0.201294		0.040539	0.061911	0.005961	0.212983	-0.562089	0.162693		0.624143	0.106672	0.321846	0.117698	0.121046	0.133383
12	376-387	TFKCYGVSPTKL	10	1.46689	0.072239	1.45422	0.116684	1.72475	0.089774		0.330857	0.099755	0.37035	0.132733	0.123727	0.130676		-0.500429	0.111722	0.020422	0.133234	-0.108262	0.120136		-0.655564	0.170046	-0.273409	0.158717	-0.091207	0.199957		0.486788	0.156344	0.393946	0.132574	0.549019	0.122545
13	388-395	NDLCFTNV	7	1.83413	0.050389	1.85766	0.069164	1.99697	0.14153		-0.132497	0.167105	0.247197	0.072926	-0.052451	0.195838		-0.127096	0.070326	0.282096	0.142608	0.203646	0.188368		-0.157049	0.127215	0.301905	0.139844	0.299719	0.145986		0.277675	0.070551	0.445949	0.097074	0.285529	0.142631
14	392-399	FTNVYADS	7	1.37629	0.089978	2.45306	0.036184	2.59937	0.127179		-0.09064	0.105304	-0.648798	0.054828	-0.620445	0.14493		-0.257496	0.105038	-0.758346	0.048714	-0.474395	0.130112		-0.372449	0.091921	-0.801244	0.074046	-0.757592	0.134355		-0.233621	0.124483	-1.01778	0.065354	-0.564824	0.146295
15	393-399	TNVYADS	6	1.31685	0.097503	2.38031	0.058478	2.48834	0.13339		-0.146761	0.106075	-0.709556	0.064955	-0.594803	0.16962		-0.288245	0.102896	-0.829832	0.06494	-0.46684	0.143241		-0.407365	0.11128	-0.863685	0.076989	-0.724488	0.134928		-0.251692	0.130041	-0.95711	0.088757	-0.496619	0.177628
16	400-406	FVIRGDE	6	0.6863	0.037716	1.30834	0.044025	1.36964	0.062913		-0.002256	0.06044	-0.251641	0.047275	-0.095552	0.090361		-0.157823	0.038837	-0.346976	0.046362	-0.196465	0.063734		-0.164613	0.071204	-0.358747	0.046849	-0.261543	0.073264		-0.243375	0.062195	-0.793757	0.04617	-0.492714	0.104175
17	400-420	FVIRGDEVRQIAPGQTGNIAD	19	4.67872	0.268863	6.8969	0.175624	6.8526	0.384313		0.243773	0.302401	-0.393635	0.251441	0.150508	0.468726		-0.714422	0.297475	-1.74644	0.177422	-0.852726	0.390001		-0.548767	0.270355	-0.617766	0.251313	0.018357	0.425201		-0.913338	0.341853	-2.69992	0.182115	-0.771138	0.524073
18	401-420	VIRGDEVRQIAPGQTGNIAD	18	4.56593	0.211021	6.31543	0.103496	6.26158	0.032514		0.11521	0.213838	-0.165577	0.134859	-0.272142	0.145876		-0.483633	0.332696	-0.397144	0.269453	-0.155698	0.044665		-0.498894	0.217178	-0.216201	0.188681	0.091727	0.096287		-0.687494	0.349838	-2.23616	0.119119	-0.747166	0.182676
19	407-420	VRQIAPGQTGNIAD	12	3.17993	0.208611	4.03334	0.120133	3.88774	0.188183		0.269775	0.268084	0.23439	0.233065	0.454843	0.275728		-0.199047	0.224945	0.275745	0.164099	0.492204	0.230675		-0.260215	0.227012	0.032254	0.199943	-0.093993	0.188648		-0.511263	0.260781	-0.881629	0.221556	0.018249	0.20879
20	407-422	VRQIAPGQTGNIADYN	14	3.56706	0.172329	4.92784	0.106095	4.70156	0.152861		0.217749	0.346913	-0.349813	0.278015	0.248684	0.333555		-0.221851	0.192201	-0.493464	0.140791	0.027747	0.174954		-0.461095	0.182454	-0.485386	0.107039	0.285015	0.231469		-0.734375	0.222266	-1.83309	0.222996	-0.581201	0.214033
21	421-431	YNYKLPDDFTG	9	1.24722	0.089142	1.4387	0.10058	1.5725	0.182972		0.029898	0.098055	0.154118	0.167719	-0.023798	0.200335		-0.198516	0.100583	-0.10762	0.139058	0.046888	0.186291		-0.209798	0.209007	0.135204	0.153025	-0.029014	0.191374		-0.289495	0.113745	-0.035885	0.104861	0.155984	0.185339
22	422-431	NYKLPDDFTG	8	1.05996	0.047193	1.25455	0.079658	1.417	0.079194		0.080866	0.088777	0.123074	0.115239	0.004614	0.102029		-0.013722	0.05751	0.103699	0.109607	-0.053272	0.086006		-0.058126	0.10705	0.056088	0.096061	0.096118	0.122946		0.046166	0.09914	-0.06894	0.133208	0.264951	0.117332
23	423-429	YKLPDDF	5	0.565501	0.022608	0.799026	0.038608	0.806091	0.060612		-0.063593	0.076736	-0.240313	0.090756	-0.340655	0.078327		-0.17393	0.025091	-0.370617	0.053348	-0.243851	0.101415		-0.216921	0.139674	-0.273815	0.114647	-0.271442	0.173063		-0.001554	0.096701	-0.249422	0.078349	-0.150446	0.132487
24	423-431	YKLPDDFTG	7	0.833995	0.047339	0.939322	0.054806	1.08761	0.063622		0.117927	0.071869	0.027063	0.078356	-0.022534	0.097932		-0.081705	0.05492	-0.07138	0.080182	-0.146771	0.104863		-0.031311	0.13403	0.016434	0.069561	-0.007405	0.087657		-0.076863	0.165722	-0.097322	0.090903	-0.054936	0.069377
25	432-441	CVIAWNSNKL	9	1.06279	0.058644	1.51791	0.066191	1.92739	0.131052		0.140396	0.068972	-0.046465	0.102346	-0.139818	0.210689		0.089331	0.064009	-0.073519	0.082483	-0.156119	0.182588		0.06789	0.12038	-0.157587	0.115534	-0.419867	0.199599		0.570147	0.100584	0.168014	0.091226	-0.189971	0.131644
26	432-443	CVIAWNSNKLDS	11	1.41139	0.082553	1.66317	0.118067	2.17649	0.068898		0.182176	0.114643	0.01315	0.219648	-0.187018	0.090834		-0.124651	0.13891	-0.215145	0.194979	-0.332687	0.145755		-0.089661	0.208505	-0.095197	0.120872	-0.49377	0.236047		0.162111	0.197068	0.026249	0.254014	0.019563	0.072689
27	434-441	IAWNSNKL	7	1.11854	0.065223	1.07542	0.08871	1.37942	0.092567		0.014688	0.073241	0.178102	0.107883	0.016227	0.141999		-0.088175	0.068535	0.009708	0.090624	-0.238356	0.171414		0.115572	0.262244	0.040909	0.12561	-0.223391	0.130911		0.526867	0.07514	0.418543	0.225746	0.136953	0.093298
28	442-449	DSKVSGNY	7	1.822	0.162834	1.95086	0.113763	1.81761	0.047217		0.10891	0.170478	-0.016771	0.208892	0.212458	0.128966		0.203919	0.298773	-0.129195	0.196928	0.029676	0.142447		0.174615	0.303664	-0.239389	0.177713	0.000483	0.078763		0.401029	0.289954	0.258642	0.274655	0.336001	0.26282
29	442-452	DSKVSGNYNYL	10	2.96434	0.070006	3.24339	0.098011	3.2204	0.127169		-0.069123	0.125391	-0.23851	0.116883	-0.331657	0.201375		-0.121711	0.128558	-0.071498	0.159342	-0.106636	0.132897		-0.004197	0.175637	-0.066716	0.136	-0.050171	0.203367		0.117432	0.200499	0.167013	0.228444	0.307096	0.189479
30	444-452	KVSGNYNYL	8	1.89776	0.203915	2.17494	0.118218	2.17851	0.095989		0.462957	0.214783	0.229707	0.122104	0.275138	0.10383		0.146634	0.228752	0.013526	0.151334	-0.048314	0.135833		0.155355	0.254772	0.073763	0.177785	0.291831	0.213163		0.368521	0.220957	0.315738	0.179638	0.424645	0.185166
31	453-467	YRLFRKSNLKPFERD	13	3.04992	0.127312	3.46941	0.137592	3.60308	0.146482		0.405801	0.130641	-0.110664	0.15163	-0.215645	0.174603		-0.877918	0.142164	-0.254475	0.174515	-0.100857	0.273631		-0.766427	0.218147	0.146352	0.1769	-0.002492	0.189419		-0.981761	0.154858	-0.688994	0.141954	0.003421	0.279222
32	453-470	YRLFRKSNLKPFERDIST	16	4.08387	0.178924	5.08071	0.155808	5.512	0.292884		0.383866	0.288093	0.084663	0.250231	-0.883081	0.294961		0.067563	0.185127	-0.003249	0.219391	-0.517073	0.323884		-0.101313	0.19277	0.436405	0.26253	0.40979	0.301255		-0.157606	0.245566	-0.709068	0.156463	-0.234645	0.431498
33	454-468	RLFRKSNLKPFERDI	13	1.81466	0.151696	1.95353	0.117745	2.24952	0.08148		0.189296	0.247191	0.13412	0.139841	-0.137262	0.156249		-0.305149	0.163969	0.098248	0.22176	-0.125047	0.129805		-0.309409	0.156675	0.231767	0.186783	0.082087	0.108484		-0.09325	0.219979	0.246018	0.197181	0.28058	0.105145
34	456-467	FRKSNLKPFERD	10	1.966	0.133245	2.63152	0.147879	2.42991	0.13787		-0.072951	0.232489	-0.201985	0.161373	0.016705	0.150148		-0.41292	0.178216	-0.169329	0.170788	0.074857	0.159675		-0.3499	0.193378	-0.135516	0.189378	0.229108	0.142113		-0.562258	0.163662	-0.675451	0.215057	0.267835	0.202265
35	456-470	FRKSNLKPFERDIST	13	3.24715	0.099013	3.96974	0.161338	4.23196	0.075827		0.047916	0.170942	-0.05007	0.17312	-0.092361	0.150427		0.038671	0.134726	0.116805	0.176589	-0.208171	0.086731		-0.048175	0.212514	0.181595	0.270456	0.114407	0.210114		-0.204798	0.212253	-0.503051	0.166979	0.082385	0.201975
36	471-482	EIYQAGNKPCNG	10	2.84839	0.158087	2.99777	0.146051	2.95488	0.080219		0.271499	0.172264	0.001643	0.148362	0.026298	0.21473		0.037155	0.205359	-0.121763	0.157194	-0.159088	0.113306		0.155519	0.160532	-0.011793	0.232218	-0.036085	0.139086		0.099541	0.250788	-0.289836	0.239791	-0.063297	0.084351
37	471-486	EIYQAGNKPCNGVAGF	14	4.24147	0.112273	4.15726	0.19758	4.09174	0.11678		0.032159	0.149562	-0.10552	0.20596	-0.14915	0.18099		-0.02878	0.188845	-0.015119	0.199119	-0.105015	0.117179		-0.072334	0.118125	0.004059	0.201918	0.06941	0.135255		-0.257085	0.166349	-0.022985	0.219783	0.332378	0.178138
38	472-486	IYQAGNKPCNGVAGF	13	4.08532	0.081317	4.04761	0.081522	3.95729	0.154885		0.224037	0.159856	0.050415	0.124867	0.162732	0.280348		-0.219658	0.155116	-0.122491	0.112051	-0.149461	0.156365		-0.17818	0.093506	-0.116447	0.114039	0.028207	0.199239		-0.006858	0.11784	0.29386	0.084301	0.256556	0.18548
39	483-494	VAGFNCYFPLRS	10	4.48201	0.104128	5.19848	0.087069	5.4547	0.111561		0.241353	0.163217	0.048372	0.115215	0.096463	0.222146		0.203088	0.11421	0.030108	0.139987	0.03611	0.122929		0.261912	0.241545	-0.091212	0.087866	0.288872	0.118953		-0.121256	0.105799	-0.28149	0.090187	0.014914	0.134126
40	487-494	NCYFPLRS	6	1.70116	0.131244	2.18712	0.144196	2.30043	0.145112		0.156137	0.156057	0.108622	0.158011	0.020417	0.170006		0.077933	0.194397	0.123436	0.153617	0.009751	0.154273		0.047106	0.140234	0.171135	0.174691	0.135096	0.171109		-0.245574	0.157861	-0.326221	0.169598	0.038727	0.205102
41	487-495	NCYFPLRSY	7	2.0709	0.140759	2.71381	0.114763	2.6138	0.171034		0.034809	0.237758	0.219916	0.163293	0.248525	0.227154		-0.04555	0.237992	0.05414	0.135286	0.229191	0.190838		-0.16155	0.15993	0.110684	0.146633	0.287441	0.208183		-0.34778	0.170098	-0.519174	0.155899	0.188411	0.21998
42	492-501	LRSYSFRPTY	8	2.14062	0.167653	2.73864	0.092152	2.61635	0.298374		-0.19774	0.246942	-0.287445	0.093646	-0.115794	0.343911		-0.241096	0.237142	-0.1641	0.140877	0.067019	0.333537		-0.164461	0.177458	-0.187618	0.112288	0.154845	0.326084		-0.127372	0.23766	-0.399881	0.140566	-0.1106	0.298817
43	495-510	YSFRPTYGVGHQPYRV	13	2.92602	0.064502	3.35642	0.124841	3.58856	0.225084		-0.279299	0.190225	-0.754925	0.137537	-0.444649	0.226453		-0.640756	0.22484	-0.871996	0.175483	-0.715564	0.251401		-0.36745	0.131137	-0.641446	0.229489	-0.47454	0.313601		-0.597143	0.25426	-0.732233	0.180671	-0.403498	0.48101
44	495-512	YSFRPTYGVGHQPYRVVV	15	3.09059	0.079731	3.5249	0.19236	3.8815	0.064178		-0.775304	0.118914	-0.553693	0.247892	-0.730605	0.235076		-0.970135	0.102351	n.a.	n.a.	-0.76342	0.124169		-0.638015	0.244014	-0.721096	0.303604	-0.518997	0.30134		-0.672318	0.310272	-0.587855	0.202783	-0.571186	0.161647
45	515-533	FELLHAPATVCGPKKSTNL	16	3.5323	0.153455	3.55132	0.098889	3.74419	0.197574		0.394712	0.209657	0.348964	0.138969	0.144185	0.245994		-0.157512	0.16851	0.234558	0.14649	0.067376	0.218384		0.198227	0.243932	0.573385	0.149259	0.403045	0.222305		0.441395	0.238984	0.512592	0.289105	0.531004	0.323125
46	516-533	ELLHAPATVCGPKKSTNL	15	3.45942	0.064265	3.10176	0.228492	n.a.	n.a.		-0.217021	0.265669	-0.046839	0.286391	n.a.	n.a.		-0.46548	0.214686	-0.044738	0.256235	n.a.	n.a.		-0.448947	0.166105	0.17796	0.313298	n.a.	n.a.		-0.152605	0.226449	0.393447	0.252071	n.a.	n.a.
47	521-533	PATVCGPKKSTNL	10	2.53782	0.181837	2.62141	0.016607	2.41469	0.209206		-0.225978	0.20726	-0.451288	0.254733	0.130041	0.235502		-0.145522	0.231313	-0.250777	0.09451	-0.08269	0.210181		-0.11206	0.182594	-0.007892	0.048434	0.225734	0.285698		-0.159704	0.182594	-0.291588	0.310873	0.248052	0.32567
48	534-541	VKNKCVNF	7	1.61338	0.059926	1.65206	0.134189	1.60699	0.153987		-0.386085	0.088035	-0.164732	0.138626	0.068931	0.197745		0.090111	0.105199	0.084283	0.142125	0.107269	0.157569		0.141786	0.083593	0.153794	0.159666	0.255598	0.171619		0.188912	0.089793	0.222319	0.222972	0.326142	0.222988
49	542-552	NFNGLKGTGVL	10	2.80687	0.145428	2.8176	0.166801	2.79654	0.085859		-0.850538	0.186453	-0.530404	0.16814	-0.03584	0.168697		-0.020117	0.163287	0.002431	0.172	-0.040683	0.088938		0.034644	0.149735	0.081975	0.180526	0.109579	0.1155		0.025814	0.156006	0.020953	0.188483	0.080399	0.144068
50	544-552	NGLKGTGVL	8	2.27856	0.098595	2.33948	0.141296	2.28389	0.103284		-0.788504	0.128299	-0.587129	0.186807	0.048166	0.14854		-0.092286	0.168211	-0.165931	0.15708	-0.113087	0.110897		-0.016402	0.102318	-0.094216	0.178812	-0.002333	0.111045		0.052429	0.158022	0.076087	0.153536	0.091324	0.124519
51	553-565	TESNKKFLPFQQF	11	3.37686	0.12214	3.56861	0.109366	3.53185	0.110927		-0.277903	0.192205	-0.439727	0.139698	-0.154781	0.16551		0.053377	0.23954	-0.296876	0.147465	-0.276608	0.142953		-0.049975	0.146028	-0.276979	0.144521	-0.17756	0.144554		0.041814	0.17048	-0.264004	0.200596	-0.036675	0.192047
52	553-568	TESNKKFLPFQQFGRD	14	3.87854	0.242204	3.96918	0.158036	3.9226	0.163718		-0.638608	0.256929	-0.478655	0.17196	-0.107941	0.260633		0.630697	0.283271	0.361822	0.161906	0.387791	0.235866		0.11678	0.251235	0.111124	0.186284	0.207112	0.20518		0.215594	0.256886	0.108553	0.164021	0.292111	0.194288
53	569-575	IADTTDA	6	1.53171	0.05375	1.51732	0.061005	1.43009	0.079445		-0.079888	0.077694	-0.107303	0.065585	0.047902	0.12641		-0.018292	0.07061	0.00214	0.064688	0.058308	0.082659		0.007085	0.057911	-0.006369	0.071974	0.078475	0.090055		0.411185	0.100711	0.674533	0.063519	0.981309	0.328
54	569-581	IADTTDAVRDPQT	11	4.18285	0.158751	4.17188	0.143401	4.19142	0.121364		-1.18041	0.207046	-0.558014	0.221486	-0.26295	0.18351		-0.009455	0.163192	0.092262	0.153919	0.095154	0.211131		0.098815	0.214167	0.100898	0.179571	-0.430012	0.248326		-0.063166	0.21487	-0.229362	0.14616	-0.072628	0.139781
55	569-582	IADTTDAVRDPQTL	12	4.37106	0.188972	4.59356	0.179039	4.42986	0.237255		-0.931929	0.203462	-0.63833	0.180156	-0.198792	0.278075		-0.039355	0.190784	-0.196163	0.193425	-0.219252	0.248918		-0.0658	0.217233	-0.217828	0.184191	0.000813	0.237858		0.024467	0.197288	-0.259927	0.198401	-0.128681	0.239337
56	569-583	IADTTDAVRDPQTLE	13	5.45512	0.1347	5.57965	0.058401	5.41441	0.09923		-1.56182	0.15351	-0.871493	0.086644	-0.260088	0.1676		-0.161801	0.163607	-0.149734	0.109023	-0.072431	0.114119		0.069592	0.138931	-0.102314	0.065484	0.070425	0.100756		0.034497	0.142791	-0.045695	0.126316	0.075612	0.115888
57	575-582	AVRDPQTL	6	2.3022	0.044165	2.32336	0.067589	2.35905	0.037883		-0.587354	0.089789	-0.187116	0.071136	-0.123379	0.048521		0.028017	0.07319	0.031486	0.070418	-0.052079	0.04383		0.029537	0.046543	-0.014489	0.074096	-0.032839	0.067336		0.053653	0.051174	0.020533	0.08851	-0.0298	0.059422
58	575-583	AVRDPQTLE	7	3.19854	0.085931	3.26729	0.023235	3.21419	0.047624		-0.777957	0.172786	0.179886	0.06272	0.245863	0.056337		0.231332	0.137349	0.217469	0.108444	0.341199	0.085715		0.295878	0.109747	0.319491	0.06886	0.272958	0.141559		0.25504	0.111036	0.301732	0.051046	0.360812	0.057873
59	576-582	VRDPQTL	5	1.77602	0.033057	1.81962	0.031304	1.78604	0.072625		-0.4486	0.055516	-0.110577	0.032269	0.003152	0.101262		0.064049	0.053006	0.000348	0.039508	0.016441	0.073622		0.047832	0.033615	-0.019895	0.037924	0.071433	0.077886		0.080514	0.048473	0.008136	0.034737	0.032241	0.081807
60	576-583	VRDPQTLE	6	2.69406	0.092267	2.70486	0.046133	2.68685	0.078273		-0.984507	0.125751	-0.129878	0.084727	0.027294	0.102878		0.110735	0.115096	0.10335	0.071488	0.091563	0.099411		0.079989	0.104418	0.011993	0.04979	0.036275	0.07981		-0.003016	0.095419	0.05665	0.060797	0.077836	0.08823
61	584-591	ILDITPCS	6	1.88603	0.032516	1.90066	0.050245	1.83794	0.082378		-0.436679	0.060243	-0.311108	0.050977	-0.043798	0.1159		-0.032187	0.066127	-0.026332	0.05054	0.028624	0.083056		-0.01322	0.036568	0.085674	0.094469	0.053848	0.165357		-0.008298	0.049428	-0.067755	0.05485	0.114493	0.097711
62	585-591	LDITPCS	5	1.89326	0.036311	1.92274	0.107881	1.90925	0.100949		-0.253961	0.041988	-0.27507	0.110163	-0.082245	0.132022		0.009125	0.056098	0.102705	0.155369	0.189527	0.105391		-0.001569	0.037223	0.047225	0.121853	0.153836	0.117977		-0.04182	0.037381	0.038219	0.143557	0.421866	0.119725

## Sheet: RBD-Omicron2
Table: Deuterium exchange values for different pepsin-digested fragments of RBD(Omicron BA.2) variant in the presence or absence of different proteins. The values are an average of replicate measurements with standard deviation (SD) values indicated.
				Relative Uptake of peptides of RBD(O2) in apo state							RBD(O2):LSI-CoVA-014 complex minus RBD(O2)							RBD(O2):LSI-CoVA-015 complex minus RBD(O2)							RBD(O2):LSI-CoVA-016 complex minus RBD(O2)							RBD(O2):ACE2 complex minus RBD(O2)
				1 min		10 min		100 min			1 min		10 min		100 min			1 min		10 min		100 min			1 min		10 min		100 min			1 min		10 min		100 min
S.No.	Residue No.s	Sequence	MEA	Uptake (Da)	± SD	Uptake (Da)	± SD	Uptake (Da)	± SD		ΔHDX (D)	± SD	ΔHDX (D)	± SD	ΔHDX (D)	± SD		ΔHDX (D)	± SD	ΔHDX (D)	± SD	ΔHDX (D)	± SD		ΔHDX (D)	± SD	ΔHDX (D)	± SD	ΔHDX (D)	± SD		ΔHDX (D)	± SD	ΔHDX (D)	± SD	ΔHDX (D)	± SD
1	313-325	YFQSAARVQPTES	11	5.09896	0.063555	4.93794	0.084793	5.03887	0.030323		-0.116891	0.070418	-0.204899	0.106786	0.100878	0.042883		-0.533797	0.086893	-0.175508	0.113732	-0.126105	0.198218		n.a.	n.a.	n.a.	n.a.	n.a.	n.a.		-0.593467	0.10372	-0.279919	0.090052	-0.331498	0.043735
2	333-343	TNLCPFDEVFN	9	1.03594	0.038952	1.56399	0.023338	2.6796	0.053917		0.024945	0.044722	-0.064547	0.029731	0.100738	0.105388		-0.094764	0.041786	-0.135062	0.040416	-0.122858	0.09006		0.011826	0.047782	-0.261859	0.073902	-0.329219	0.13885		-0.213762	0.056841	-0.222664	0.032601	-0.238743	0.264756
3	348-361	ASVYAWNRKRISNC	13	2.51143	0.015216	4.06798	0.058021	5.45367	0.126795		-0.255998	0.029162	-0.085617	0.21083	-0.355215	0.127709		-0.237486	0.084257	-0.250129	0.064315	-0.849037	0.130929		-0.022056	0.065556	-0.89235	0.059983	-0.822117	0.216717		-0.617412	0.057557	-1.57695	0.137329	-1.77466	0.186095
4	351-361	YAWNRKRISNC	10	2.16888	0.07709	3.1439	0.06357	3.74499	0.061312		0.05729	0.080565	-0.9039	0.067742	-0.5079	0.065634		-0.070004	0.087358	-0.433745	0.094925	-0.294246	0.161881		0.042049	0.099205	-0.725503	0.07787	-0.687684	0.103464		-0.330732	0.089303	-1.08363	0.075463	-1.04112	0.070271
5	352-361	AWNRKRISNC	9	1.82981	0.103373	2.58875	0.024181	3.03866	0.013205		-0.218077	0.104213	-0.479237	0.027551	-0.25344	0.018674		-0.186093	0.105916	-0.437487	0.057941	-0.112166	0.018674		-0.079189	0.121969	-0.629937	0.028453	-0.578263	0.080703		-0.271732	0.104213	-0.903955	0.057213	-0.769503	0.018674
6	369-375	YNFAPFF	5	2.0614	0.120542	2.12106	0.119418	2.12528	0.120627		0.035066	0.171489	0.001069	0.170108	-0.041249	0.17472		-0.024949	0.163616	-0.081902	0.157275	-0.080405	0.170599		0.023991	0.174999	-0.043082	0.169176	-0.099128	0.168166		-0.149007	0.164458	-0.16717	0.151774	-0.163952	0.167943
7	369-376	YNFAPFFA	6	2.48578	0.237733	2.61916	0.231488	2.61189	0.228788		0.048345	0.334155	-0.074637	0.325999	-0.080502	0.329468		-0.031684	0.331655	-0.180007	0.325883	-0.152039	0.327515		0.017327	0.332612	-0.130671	0.325868	-0.179744	0.324723		-0.213969	0.331064	-0.301372	0.326159	-0.275403	0.32602
8	376-387	AFKCYGVSPTKL	10	3.68362	0.097936	3.96248	0.060962	4.19561	0.019855		-0.394934	0.10238	-0.234929	0.069373	-0.530537	0.028079		-1.65233	0.10994	-1.72517	0.129717	-2.03892	0.033845		-2.09937	0.099929	-2.17931	0.064114	-1.28067	0.27042		-0.511008	0.19108	-0.545657	0.064114	-1.12972	0.028079
9	377-387	FKCYGVSPTKL	9	3.47674	0.122262	3.59357	0.13474	3.8045	0.113466		0.045313	0.175324	-0.237722	0.175042	-0.290935	0.142612		-2.11653	0.12926	-1.01353	0.13489	-0.779663	0.140909		-1.86481	0.122427	-1.67843	0.141535	-0.938412	0.182771		-0.304742	0.163757	-0.41144	0.141018	-0.539271	0.115915
10	388-395	NDLCFTNV	7	2.5286	0.062102	3.05857	0.143226	3.03474	0.086353		-0.666444	0.108504	-0.397375	0.153639	-0.153328	0.154454		-0.497239	0.101545	-0.516438	0.183925	-0.232942	0.097196		-0.724633	0.088501	-0.574586	0.154619	-0.465964	0.158912		-0.363832	0.163064	-0.432245	0.145756	-0.46374	0.111572
11	392-399	FTNVYADS	7	0.751389	0.093421	2.1029	0.040796	2.99523	0.012945		0.108738	0.093955	-0.499236	0.059429	-0.964703	0.029668		0.01329	0.094141	-0.770549	0.042288	-1.14119	0.066294		0.177661	0.116073	-0.67558	0.047942	-1.35745	0.081824		0.03192	0.40288	-0.772404	0.088818	-1.25419	0.228796
12	393-399	TNVYADS	6	0.660139	0.078676	1.94043	0.013802	2.82416	0.024171		0.080538	0.080892	-0.531232	0.043257	-1.02334	0.031394		-0.015154	0.080683	-0.795824	0.020337	-1.17565	0.055043		0.139328	0.081409	-0.746767	0.018973	-1.35876	0.077009		-0.021468	0.08314	-0.823293	0.057268	-1.16696	0.160635
13	393-400	TNVYADSF	7	0.595037	0.076185	2.0461	0.027998	3.1709	0.018589		0.119886	0.109812	-0.763979	0.072168	-1.43333	0.030663		0.003891	0.082956	-1.11459	0.051944	-1.6148	0.073728		0.29242	0.097289	-0.979567	0.040349	-1.78944	0.07414		-0.075239	0.084569	-1.23366	0.076366	-1.7754	0.21931
14	400-406	FVIRGNE	6	0.589371	0.064981	1.31347	0.017995	2.05803	0.039753		-0.00473	0.065493	-0.132009	0.020879	-0.333446	0.051827		-0.059448	0.07029	-0.383329	0.033416	-0.530431	0.073473		0.069774	0.07123	-0.414829	0.027601	-0.644055	0.055094		-0.112679	0.065493	-0.815968	0.019762	-0.75704	0.040584
15	400-408	FVIRGNEVS	8	1.27945	0.068172	2.55813	0.069523	3.47029	0.008368		0.156509	0.079363	n.a.	n.a.	-0.430655	0.021851		n.a.	n.a.	n.a.	n.a.	n.a.	n.a.		0.217122	0.089362	-0.542793	0.083901	-0.704768	0.038757		-0.098195	0.138296	-1.04668	0.08305	-1.00975	0.183094
16	400-420	FVIRGNEVSQIAPGQTGNIAD	19	3.36689	0.284044	6.08026	0.10998	8.32074	0.078343		0.368757	0.385815	-0.176663	0.110066	-0.440187	0.083901		0.190607	0.325474	-0.823104	0.123513	-1.04315	0.285788		0.400705	0.32212	-1.10534	0.110171	-1.45924	0.166986		-0.667614	0.303455	-2.4607	0.165237	-2.99726	0.340941
17	400-421	FVIRGNEVSQIAPGQTGNIADY	20	3.61345	0.239338	6.69669	0.06663	8.84836	0.232001		-0.065043	0.30639	-0.441198	0.252811	-0.27189	0.290312		-0.18616	0.295516	-1.16617	0.180055	-0.898711	0.248849		0.171413	0.239445	-1.32901	0.167165	-1.29846	0.263602		-0.777095	0.263574	-3.01734	0.176738	-3.27235	0.429836
18	401-420	VIRGNEVSQIAPGQTGNIAD	18	3.53327	0.197349	5.92186	0.152877	7.29174	0.139638		0.215985	0.238135	0.040891	0.183261	0.179062	0.276523		-0.073549	0.211302	-0.734486	0.188101	-0.516113	0.303938		0.347468	0.242472	-0.896501	0.16557	-0.624065	0.193045		-0.70766	0.20284	-2.02477	0.155403	-2.06244	0.316397
19	407-420	VSQIAPGQTGNIAD	12	2.55144	0.17682	4.16012	0.062203	5.06226	0.062945		0.182517	0.206798	-0.130083	0.067332	-0.238065	0.110048		0.13762	0.181082	-0.688241	0.120248	-0.372531	0.087178		0.357191	0.177911	-0.66721	0.065241	-0.588157	0.110989		-0.328862	0.229947	-1.59894	0.075287	-1.71299	0.231609
20	421-431	YNYKLPDDFTG	9	1.28344	0.050073	2.15594	0.023672	3.09333	0.144864		0.03223	0.082637	-0.175631	0.093774	-0.304454	0.166517		-0.183739	0.060864	-0.564154	0.083955	-0.712529	0.146679		0.185198	0.063824	-0.584777	0.17377	-0.629144	0.20853		-0.254078	0.051105	-1.12923	0.079904	-1.43589	0.145223
21	422-431	NYKLPDDFTG	8	1.17225	0.057288	1.833	0.039909	2.5799	0.064798		0.113494	0.095663	0.112768	0.067253	-0.179867	0.07754		0.012605	0.097329	-0.337339	0.214327	-0.538559	0.279615		0.095813	0.071276	-0.439578	0.052106	-0.546102	0.068793		-0.194828	0.07195	-0.830865	0.132415	-0.91508	0.382598
22	423-429	YKLPDDF	5	0.639365	0.029845	0.955857	0.017855	1.32086	0.011899		-0.101021	0.08051	-0.168637	0.028653	-0.151759	0.096553		-0.227322	0.032144	-0.419528	0.019825	-0.506274	0.109313		-0.275955	0.031065	-0.429858	0.05789	-0.381121	0.122794		-0.130038	0.0325	-0.429362	0.035021	-0.662202	0.113303
23	423-431	YKLPDDFTG	7	1.03316	0.014139	1.41392	0.037674	1.95886	0.048426		-0.006435	0.020381	-0.031367	0.042932	-0.231917	0.053005		-0.085639	0.032349	-0.424132	0.04024	-0.567295	0.050448		0.050209	0.019995	-0.311606	0.04024	-0.450708	0.051773		-0.225944	0.039063	-0.550074	0.05264	-0.82013	0.08977
24	432-441	CVIAWNSNKL	9	1.97613	0.081777	2.48686	0.053048	3.58656	0.093358		0.031056	0.14765	-0.341552	0.059753	-0.844208	0.163396		-0.056946	0.115029	-0.231653	0.061172	n.a.	n.a.		0.041495	0.100543	-0.534719	0.056929	-1.41758	0.131191		-0.353049	0.08775	-0.731311	0.071224	-1.34358	0.097699
25	434-441	IAWNSNKL	7	1.86552	0.070034	2.14389	0.022182	2.59186	0.037147		-0.053779	0.073463	-0.23937	0.034302	-0.449165	0.043266		-0.089731	0.073536	-0.250684	0.034113	-0.621426	0.055179		n.a.	n.a.	-0.25685	0.031373	-0.717524	0.050316		-0.297128	0.075044	-0.40599	0.086422	-0.809965	0.043266
26	442-449	DSKVGGNY	7	2.2966	0.03369	2.30233	0.071416	2.29007	0.035757		0.108919	0.039255	-0.044695	0.08298	-0.069671	0.078942		-0.084711	0.071292	-0.145789	0.083853	-0.113147	0.0892		-0.013261	0.10502	-0.076469	0.076817	-0.133827	0.051352		-0.276559	0.092739	-0.15724	0.07556	-0.187634	0.098726
27	453-467	YRLFRKSNLKPFERD	13	1.62371	0.12373	3.73758	0.05294	4.13267	0.195623		0.270506	0.124504	-0.186262	0.054724	-0.382073	0.203724		0.151072	0.125669	-0.513971	0.054724	-0.320785	0.196114		0.087602	0.124642	-0.243633	0.054724	-0.452636	0.197858		-0.284771	0.131661	-1.54556	0.154664	-0.871511	0.20804
28	453-470	YRLFRKSNLKPFERDIST	16	3.97051	0.0075	5.79024	0.095431	6.08388	0.0075		0.022994	0.010781	n.a.	n.a.	0.325078	0.010606		-0.149521	0.148024	n.a.	n.a.	0.030997	0.338336		0.255802	0.028226	0.040238	0.095725	0.065376	0.190573		-0.77775	0.111482	-1.362	0.306446	-0.459396	0.122383
29	456-467	FRKSNLKPFERD	10	1.46633	0.099824	2.96154	0.054197	3.24131	0.022184		0.036926	0.102265	0.008935	0.060212	-0.101231	0.084079		-0.149287	0.10697	-0.451398	0.055882	-0.207235	0.089382		0.231669	0.133477	-0.370875	0.063427	-0.42755	0.026031		-0.50511	0.11345	-1.39923	0.076716	-0.904519	0.063513
30	456-469	FRKSNLKPFERDIS	12	2.87846	0.197069	4.66104	0.077955	5.07968	0.110788		0.34111	0.20584	-0.259473	0.098035	-0.398695	0.280638		n.a.	n.a.	n.a.	n.a.	n.a.	n.a.		0.431089	0.233856	-0.13701	0.112853	n.a.	n.a.		-0.344363	0.232325	-1.38446	0.11837	-0.978913	0.125729
31	456-470	FRKSNLKPFERDIST	13	n.a.	n.a.	4.40338	0.076657	4.75359	0.018698		n.a.	n.a.	0.228003	0.078905	0.067262	0.026443		n.a.	n.a.	0.00082	0.078905	-0.069552	0.157665		n.a.	n.a.	-0.060707	0.107967	-0.045275	0.026443		n.a.	n.a.	-0.933275	0.147129	-0.31463	0.058458
32	471-482	EIYQAGNKPCNG	10	3.55916	0.060022	3.53759	0.087367	3.53374	0.057456		-0.084043	0.159865	-0.078683	0.114317	-0.101963	0.12067		-0.199538	0.085068	-0.201827	0.123961	-0.273969	0.135046		-0.107906	0.144199	-0.14361	0.110562	-0.313426	0.121965		n.a.	n.a.	n.a.	n.a.	n.a.	n.a.
33	471-486	EIYQAGNKPCNGVAGF	14	4.82709	0.101037	4.79254	0.147652	4.89674	0.165152		-0.166922	0.228312	-0.138258	0.201427	-0.262449	0.230282		n.a.	n.a.	n.a.	n.a.	n.a.	n.a.		0.116013	0.101284	-0.29103	0.147821	-0.721353	0.165303		-1.04374	0.10136	-0.696578	0.147873	-0.734509	0.261324
34	472-486	IYQAGNKPCNGVAGF	13	5.0269	0.216146	4.47341	0.150458	4.47991	0.046476		-0.787718	0.218491	-0.243716	0.153808	-0.19502	0.056385		-0.941525	0.218491	n.a.	n.a.	-0.517279	0.056385		-0.669959	0.223418	-0.341508	0.153808	n.a.	n.a.		-1.39699	0.218491	-0.679988	0.153808	-0.756523	0.100308
35	487-494	NCYFPLRS	6	1.80636	0.066348	2.64602	0.04147	2.8741	0.035829		0.085858	0.09167	-0.035081	0.046524	-0.099868	0.048869		-0.036119	0.071181	-0.183687	0.071266	-0.154127	0.074481		0.190999	0.082921	-0.138594	0.04368	-0.190241	0.040877		-0.375929	0.079137	-0.728755	0.068497	-0.54556	0.071699
36	487-496	NCYFPLRSYG	8	2.23312	0.104092	3.44507	0.065294	3.65147	0.049457		0.171011	0.137614	-0.022012	0.069349	-0.117863	0.081506		-0.028386	0.110076	-0.258371	0.088826	-0.197577	0.096212		0.28143	0.138888	-0.171365	0.074341	-0.282474	0.073983		-0.44793	0.119242	-0.883979	0.090716	-0.648811	0.056051
37	487-510	NCYFPLRSYGFRPTYGVGHQPYRV	20	4.75109	0.178236	6.59277	0.1885	8.1166	0.081395		-0.072644	0.182397	-0.683474	0.356337	n.a.	n.a.		-0.419435	0.241607	-1.18956	0.210284	-2.17416	0.333262		-0.080909	0.196453	-1.21399	0.20019	-2.96903	0.090143		-1.48234	0.196279	-1.99476	0.348168	-2.51035	0.316318
38	491-510	PLRSYGFRPTYGVGHQPYRV	16	3.85727	0.126236	5.11985	0.081371	6.55891	0.06009		-0.114758	0.126336	-0.695864	0.12641	-1.63412	0.0603		-0.380124	0.126336	-1.03285	0.081526	-2.22613	0.340855		0.225412	0.159069	-0.962132	0.087234	-2.3078	0.0603		-1.37665	0.126336	-1.83379	0.132093	-2.41815	0.064176
39	491-513	PLRSYGFRPTYGVGHQPYRVVVL	19	3.56397	0.094097	5.10571	0.022405	7.9792	0.062409		-0.070367	0.160471	-0.769094	0.099658	-2.76215	0.393657		n.a.	n.a.	-1.18074	0.031685	-3.22154	0.087562		0.262124	0.0987	-1.28201	0.047387	-3.65379	0.104506		-1.15104	0.124878	-1.82362	0.20872	-3.89699	0.325331
40	495-513	YGFRPTYGVGHQPYRVVVL	16	2.93796	0.096063	4.14759	0.058608	6.6722	0.015101		0.015243	0.097225	-0.675157	0.07277	-2.5284	0.144511		-0.167302	0.097359	-1.29886	0.175689	-3.11449	0.235901		-0.00699	0.152605	-1.32881	0.099167	-3.8812	0.094282		-1.18316	0.309403	-1.83581	0.076841	-3.39466	0.462889
41	502-512	GVGHQPYRVVV	9	1.23908	0.034192	2.09518	0.018103	4.014	0.026543		-0.078084	0.080604	-0.66578	0.110726	-1.84616	0.107008		-0.13875	0.043279	-0.975614	0.06402	-2.36332	0.12918		-0.053373	0.055868	-0.936798	0.046615	-2.64556	0.130553		-0.341613	0.045875	-1.08793	0.107782	-2.62737	0.1473
42	514-533	SFELLHAPATVCGPKKSTNL	17	5.03557	0.147883	4.78271	0.012403	5.04048	0.246675		-0.111803	0.148402	-0.303923	0.262915	-0.268567	0.298209		-0.488861	0.148402	-0.305811	0.017541	-0.574597	0.302213		-0.48992	0.148402	-0.207047	0.115025	-0.952945	0.246987		-1.00181	0.214776	-0.760072	0.017541	-0.952697	0.267656
43	516-532	ELLHAPATVCGPKKSTN	14	3.90677	0.012837	4.07827	0.216357	4.10383	0.176609		-0.546464	0.018155	-0.177439	0.216738	-0.285019	0.178337		-0.220977	0.018155	-0.344748	0.217786	-0.535356	0.177075		-0.298741	0.221119	-0.320463	0.231173	-0.398931	0.200374		-0.49867	0.07538	-0.826152	0.22494	-0.787332	0.196875
44	516-533	ELLHAPATVCGPKKSTNL	15	3.8488	0.03232	3.94548	0.013157	3.7402	0.013157		-0.591434	0.199181	-0.492419	0.032445	-0.333905	0.112674		-0.366032	0.043479	-0.58949	0.054003	-0.495447	0.103098		-0.490738	0.037244	-0.609979	0.030704	-0.522646	0.08369		-0.796872	0.056621	-0.992407	0.048385	-0.761703	0.100161
45	517-533	LLHAPATVCGPKKSTNL	14	3.98003	0.102289	3.95635	0.118338	3.98277	0.034194		-0.875562	0.107193	-0.337585	0.191889	-0.384821	0.046866		n.a.	n.a.	n.a.	n.a.	n.a.	n.a.		-0.813204	0.107193	-0.477744	0.144402	-0.752975	0.081354		-0.992951	0.121447	-1.05556	0.122601	-1.00701	0.089379
46	518-533	LHAPATVCGPKKSTNL	13	3.41883	0.027199	3.62053	0.027199	3.67173	0.053842		0.195355	0.038465	0.082141	0.038465	-0.003187	0.071693		0.0025	0.038465	-0.435215	0.403412	-0.527713	0.204359		-0.070849	0.038465	-0.049621	0.038465	-0.65109	0.125449		-0.346262	0.045291	-0.622617	0.131917	-0.595577	0.0841
47	521-533	PATVCGPKKSTNL	10	3.1266	0.007679	3.07121	0.09614	3.14742	0.007679		-0.552776	0.19534	0.109141	0.096446	-0.326807	0.010859		-0.447994	0.046113	-0.509254	0.096446	-0.326437	0.010859		n.a.	n.a.	n.a.	n.a.	n.a.	n.a.		-0.715192	0.077843	n.a.	n.a.	-0.758814	0.010859
48	522-533	ATVCGPKKSTNL	10	3.18855	0.015211	3.27064	0.015211	3.05307	0.015211		-0.607845	0.044634	-0.667434	0.021512	-0.20543	0.096169		-0.505518	0.021512	-0.755602	0.094361	-0.408482	0.087919		n.a.	n.a.	-0.611865	0.021512	-0.531751	0.021512		-0.718457	0.135834	-0.871204	0.0637	-0.645476	0.142513
49	534-541	VKNKCVNF	7	1.93695	0.022632	1.95354	0.047239	2.04258	0.091341		-0.922023	0.027573	-0.429434	0.049795	-0.137935	0.094088		-0.008485	0.073907	-0.017974	0.095046	-0.153436	0.103464		0.015535	0.134573	-0.118069	0.051876	-0.226262	0.097735		-0.227117	0.041137	-0.186203	0.081627	-0.340986	0.092693
50	542-552	NFNGLTGTGVL	10	3.28118	0.039955	3.24457	0.071574	3.27447	0.021117		-1.64322	0.063853	-0.853381	0.094634	-0.207187	0.087148		-0.273603	0.055702	-0.299287	0.080846	-0.335722	0.10566		-0.214697	0.051119	-0.319496	0.073376	-0.461623	0.047487		-0.588982	0.056504	-0.617385	0.080637	-0.624505	0.050686
51	542-568	NFNGLTGTGVLTESNKKFLPFQQFGRD	25	8.4138	0.053518	8.40127	0.328227	8.82525	0.08159		-3.2344	0.139211	-2.04587	0.331462	0.546742	0.145787		0.084238	0.139757	0.191328	0.330681	-0.083222	0.09057		-0.185212	0.066409	0.309047	0.330573	-0.367495	0.108198		-0.022931	0.066409	-0.186163	0.330573	-0.755646	0.090578
52	544-552	NGLTGTGVL	8	2.71933	0.041508	2.66982	0.047368	2.71495	0.026165		-1.54828	0.045845	-0.715328	0.061929	-0.111032	0.041956		-0.230034	0.058746	-0.222591	0.070163	-0.227786	0.0787		-0.182694	0.054053	-0.198243	0.050328	-0.296206	0.046316		-0.377998	0.046865	-0.38832	0.051748	-0.373841	0.048664
53	546-552	LTGTGVL	6	2.24261	0.029603	2.20146	0.039284	2.23316	0.013589		-1.22822	0.165286	-0.447319	0.093035	0.122244	0.121545		-0.137024	0.3187	0.030156	0.040911	-0.172304	0.082979		-0.048135	0.056841	-0.111469	0.077028	-0.141966	0.117233		-0.150575	0.076709	-0.112788	0.181906	-0.22231	0.075988
54	553-565	TESNKKFLPFQQF	11	3.70161	0.041525	3.66756	0.084664	3.7434	0.072614		-1.13647	0.043164	-0.341055	0.084765	-0.101517	0.086934		-0.383037	0.056656	-0.449322	0.090807	-0.498194	0.124287		-0.151907	0.102246	-0.170704	0.084747	-0.334923	0.090356		-0.433146	0.041525	-0.492667	0.100449	-0.573483	0.130551
55	553-568	TESNKKFLPFQQFGRD	14	3.86912	0.048289	3.70456	0.025512	3.92717	0.061232		-0.952963	0.253155	-0.154568	0.08654	0.090983	0.175445		0.105844	0.048577	0.079855	0.087319	-0.084473	0.079891		0.194683	0.048441	0.068078	0.09688	-0.130634	0.063877		-0.157882	0.075733	-0.04708	0.129872	-0.250818	0.061601
56	557-569	KKFLPFQQFGRDI	11	0.926262	0.061536	1.83919	0.035391	2.79371	0.038926		0.075685	0.079251	-0.098405	0.045957	-0.121031	0.057769		-0.004567	0.095544	-0.28598	0.045957	-0.28891	0.05963		0.011871	0.072494	-0.280286	0.063807	-0.445854	0.102338		-0.21738	0.068222	-0.253539	0.045957	0.062131	0.089089
57	569-581	IADTTDAVRDPQT	11	4.50342	0.030163	4.34743	0.060748	4.44185	0.031491		-1.95904	0.031755	-0.566509	0.068475	-0.042424	0.061177		-0.294398	0.04447	-0.117724	0.088214	0.032179	0.194717		-0.043209	0.042483	0.002803	0.09734	-0.31575	0.176708		-0.44271	0.048874	-0.29378	0.12391	-0.289197	0.048538
58	569-582	IADTTDAVRDPQTL	12	4.77778	0.062955	4.70546	0.049027	4.74402	0.056501		-2.1405	0.066556	n.a.	n.a.	-0.170029	0.069189		-0.412379	0.113519	-0.345329	0.052047	-0.263434	0.131367		-0.44225	0.064068	-0.379768	0.050449	n.a.	n.a.		-0.934902	0.073622	-0.518289	0.086116	-0.327784	0.087457
59	569-583	IADTTDAVRDPQTLE	13	n.a.	n.a.	5.73663	0.041182	5.81291	0.040118		n.a.	n.a.	n.a.	n.a.	-0.029606	0.113375		n.a.	n.a.	-0.300949	0.077273	-0.290943	0.052053		n.a.	n.a.	-0.170369	0.32048	n.a.	n.a.		n.a.	n.a.	n.a.	n.a.	-0.648232	0.166206
60	569-584	IADTTDAVRDPQTLEI	14	6.27349	0.088514	6.20011	0.023504	6.43794	0.108987		n.a.	n.a.	n.a.	n.a.	n.a.	n.a.		-0.144012	0.091582	0.112921	0.03324	-0.118602	0.111493		-0.245564	0.154782	-0.314919	0.062388	-0.549414	0.142568		-0.464472	0.120757	-0.487239	0.060082	-0.776448	0.23677
61	569-585	IADTTDAVRDPQTLEIL	15	6.4978	0.124452	6.42107	0.100081	6.56721	0.027769		-2.97861	0.174457	-0.99093	0.12215	-0.160386	0.155365		-0.23142	0.126306	-0.223707	0.12519	-0.220742	0.185076		-0.406561	0.145668	-0.137941	0.104343	-0.378767	0.064827		-0.446367	0.181735	-0.518152	0.139839	-0.458216	0.118552
62	575-582	AVRDPQTL	6	2.4641	0.011652	2.44616	0.028409	2.46374	0.018288		-1.07709	0.035643	-0.213046	0.029689	-0.038752	0.040292		-0.081134	0.015771	-0.034042	0.040514	-0.064155	0.068154		-0.058771	0.05594	-0.063951	0.03232	-0.133209	0.057817		-0.182682	0.02794	-0.15669	0.030975	-0.167756	0.037173
63	576-582	VRDPQTL	5	1.90634	0.008307	1.874	0.026002	1.86467	0.008307		-0.805274	0.043344	-0.063959	0.034925	-0.009877	0.033969		-0.055302	0.011748	-0.011689	0.027297	-0.047653	0.058855		-0.055816	0.034154	-0.056523	0.027394	-0.085481	0.029479		-0.135056	0.029412	-0.140443	0.032687	-0.091431	0.01327
64	576-583	VRDPQTLE	6	2.86252	0.037085	2.82664	0.022638	2.84841	0.022769		-1.30361	0.098673	-0.181872	0.04759	0.053028	0.044937		-0.068693	0.051498	-0.051411	0.050777	-0.010992	0.082652		-0.078157	0.067418	-0.063667	0.032304	-0.106609	0.029777		-0.127361	0.047589	-0.078841	0.03756	-0.11008	0.035139
65	576-584	VRDPQTLEI	7	3.18685	0.053848	3.07662	0.037415	3.19397	0.006204		-1.58384	0.142494	-0.270578	0.083873	-0.241886	0.01109		-0.17039	0.096364	-0.122422	0.122762	-0.166627	0.123628		-0.164183	0.078501	0.004171	0.040178	-0.237356	0.04742		-0.316335	0.086553	-0.138009	0.040017	-0.318851	0.105265
66	584-591	ILDITPCS	6	2.02966	0.0237	2.01989	0.027816	2.03552	0.024627		-0.844406	0.0452	-0.469764	0.046703	-0.072102	0.038964		-0.13935	0.029907	-0.128213	0.030712	-0.123691	0.07222		-0.117578	0.038028	-0.142511	0.033177	-0.288236	0.055532		-0.219812	0.034902	-0.259668	0.038771	-0.221384	0.049239
67	585-591	LDITPCS	5	2.19627	0.026583	2.17845	0.018477	2.17852	0.024065		-0.743851	0.047441	-0.392091	0.026312	-0.064377	0.058675		-0.09518	0.076373	-0.063318	0.10499	-0.067716	0.047903		-0.109646	0.055521	-0.095044	0.025477	-0.286456	0.038977		-0.233952	0.050273	-0.380771	0.057806	0.015452	0.067247

## Sheet: Spike-Delta
Table: Deuterium exchange values for different pepsin-digested fragments of Spike(Delta) variant in the presence or absence of different proteins. The values are an average of replicate measurements with standard deviation (SD) values indicated.
				Relative Uptake of peptides of SpikeDelta in apo state							Spike(Delta):LSI-CoVA-014 complex minus Spike(Delta)							Spike(Delta):LSI-CoVA-015 complex minus Spike(Delta)							Spike(Delta):LSI-CoVA-016 complex minus Spike(Delta)							Spike(Delta):ACE2 complex minus Spike(Delta)							Spike(Delta):CoVA2-04 complex minus Spike(Delta)							Spike(Delta):5A6 complex minus Spike(Delta)
				1 min		10 min		100 min			1 min		10 min		100 min			1 min		10 min		100 min			1 min		10 min		100 min			1 min		10 min		100 min			1 min		10 min		100 min			1 min		10 min
S.No.	Residue No.s	Sequence	MEA	Uptake (Da)	± SD	Uptake (Da)	± SD	Uptake (Da)	± SD		ΔHDX (D)	± SD	ΔHDX (D)	± SD	ΔHDX (D)	± SD		ΔHDX (D)	± SD	ΔHDX (D)	± SD	ΔHDX (D)	± SD		ΔHDX (D)	± SD	ΔHDX (D)	± SD	ΔHDX (D)	± SD		ΔHDX (D)	± SD	ΔHDX (D)	± SD	ΔHDX (D)	± SD		ΔHDX (D)	± SD	ΔHDX (D)	± SD	ΔHDX (D)	± SD		ΔHDX (D)	± SD	ΔHDX (D)	± SD
1	19-31	RTRTQLPPAYTNS	10	2.69671	0.271677	3.15421	0.20257	3.53466	0.199696		0.378257	0.322674	-0.020068	0.398217	0.00344	0.201553		0.001721	0.351671	0.000485	0.49205	-0.860358	0.200681		0.116769	0.316369	0.12881	0.285299	-0.194802	0.292674		-0.400737	0.279775	-0.2446	0.281686	-0.365538	0.464654		0.019884	0.340845	-0.114807	0.244714	-0.538783	0.235864		0.357233	0.318322	-0.16728	0.255386
2	21-31	RTQLPPAYTNS	8	1.34728	0.175183	1.83823	0.107524	2.88138	0.22552		0.030004	0.180479	-0.118901	0.160493	-0.312039	0.22836		0.106759	0.191491	0.053417	0.146676	-0.56433	0.249728		-0.129896	0.221844	0.020351	0.204107	-0.551798	0.288407		-0.009114	0.207395	-0.218425	0.117815	-0.937425	0.347465		n.a.	n.a.	n.a.	n.a.	n.a.	n.a.		-0.01465	0.185726	-0.191111	0.12591
3	32-42	FTRGVYYPDKV	9	1.09964	0.055035	1.51643	0.064277	2.26227	0.125616		0.160093	0.108026	-0.159763	0.094388	-0.194647	0.129726		-0.177695	0.059306	-0.284058	0.078214	-0.464032	0.145011		-0.116176	0.059648	-0.239499	0.104647	-0.39327	0.126481		-0.463887	0.070327	-0.541409	0.072332	-0.689458	0.141394		-0.310055	0.349823	-0.357498	0.06428	-0.604569	0.125617		-0.237672	0.068492	-0.26202	0.068077
4	32-43	FTRGVYYPDKVF	10	0.868267	0.10225	1.3737	0.096878	2.3276	0.097485		0.129501	0.138759	0.079204	0.186055	-0.104296	0.132002		-0.08532	0.130706	-0.32692	0.134296	-0.505852	0.13568		-0.041516	0.141299	-0.211456	0.133897	-0.276431	0.136662		-0.267441	0.134076	-0.406039	0.143563	-0.415019	0.15885		-0.378271	0.165348	-0.41502	0.138036	-0.509706	0.132442		-0.196151	0.129898	-0.112976	0.128221
5	33-48	TRGVYYPDKVFRSSVL	14	1.94627	0.184116	3.09419	0.103284	4.23787	0.136737		0.592605	0.237156	0.066762	0.172055	0.036427	0.137652		0.19372	0.223642	-0.399344	0.13174	-0.712069	0.205084		0.266708	0.259395	-0.377982	0.186213	-0.499228	0.222787		0.392515	0.233011	0.33746	0.104493	-0.092786	0.331573		-0.290143	0.234665	-0.54617	0.186051	-1.0494	0.157254		0.005338	0.23389	-0.087768	0.188415
6	39-48	PDKVFRSSVL	8	1.33246	0.335445	1.96162	0.210955	2.71892	0.099786		0.359386	0.375491	0.127911	0.264258	-0.133875	0.146828		n.a.	n.a.	0.301126	0.217673	-0.196078	0.179322		0.744471	0.336902	-0.123956	0.249027	-0.261477	0.148719		0.546872	0.389956	0.290026	0.269492	-0.037956	0.214246		-0.013063	0.4513	-0.436845	0.243138	-0.035225	0.156753		-0.237675	0.337752	0.095077	0.218179
7	45-56	SSVLHSTQDLFL	11	0.237199	0.104629	0.309535	0.111388	0.366154	0.082001		-0.037332	0.125486	0.131524	0.139667	0.301809	0.192346		0.565526	0.115807	0.498998	0.129071	0.403312	0.155286		0.202376	0.110716	0.374333	0.221769	-0.053459	0.130272		n.a.	n.a.	n.a.	n.a.	n.a.	n.a.		0.205731	0.110727	0.131782	0.117124	0.075529	0.089637		0.121527	0.139952	-0.103786	0.155618
8	49-55	HSTQDLF	6	0.691337	0.1485	0.87858	0.046394	1.18844	0.05511		-0.112873	0.151003	-0.004763	0.091876	-0.10001	0.087536		0.25685	0.156066	0.330997	0.140499	0.202918	0.055115		0.019119	0.300484	0.341601	0.079766	0.589031	0.09076		0.130095	0.162424	0.147557	0.061794	0.294046	0.075094		0.218006	0.153048	0.222859	0.086136	0.425998	0.105635		0.201854	0.150983	0.102873	0.114685
9	78-92	RFDNPVLPFNDGVYF	12	2.33636	0.030088	3.09887	0.030088	2.96982	0.030339		0.436286	0.139209	0.501504	0.145887	0.779295	0.115296		0.116256	0.065232	0.714226	0.201067	1.13342	0.034341		0.143056	0.106683	0.105672	0.065301	0.630332	0.137637		0.176024	0.047495	0.290568	0.047495	0.172316	0.078829		0.07805	0.135209	0.533525	0.051984	1.28262	0.066555		-0.261852	0.030709	-0.140048	0.102406
10	92-103	FASIEKSNIIRG	11	2.48477	0.134301	3.25044	0.108222	3.68144	0.121351		0.456403	0.168137	0.15636	0.143276	0.068478	0.24852		0.414346	0.14651	0.178455	0.166503	0.144571	0.152525		0.445308	0.180243	0.219401	0.152693	0.072577	0.248448		0.049205	0.163851	-0.307353	0.110383	-0.42001	0.172376		0.099444	0.168665	-0.154417	0.213419	-0.131197	0.134844		0.391919	0.150177	0.076185	0.139697
11	92-106	FASIEKSNIIRGWIF	14	1.83837	0.056976	2.4905	0.109126	2.78336	0.07647		0.193965	0.080649	-0.063259	0.154711	-0.219096	0.116254		0.222341	0.085395	0.040139	0.168196	0.023716	0.081535		0.21457	0.078159	-0.04502	0.109513	-0.158771	0.133622		-0.028946	0.103724	-0.117984	0.129711	-0.171282	0.08188		-0.133262	0.06098	-0.27397	0.111535	-0.320676	0.086207		0.08716	0.061734	-0.137965	0.112305
12	92-110	FASIEKSNIIRGWIFGTTL	18	2.6021	0.089259	4.35277	0.157009	4.7076	0.108968		0.343099	0.130708	-0.088822	0.199455	-0.299324	0.149011		0.743368	0.137428	0.030657	0.204589	0.019946	0.153849		0.826389	0.136354	-0.042889	0.16111	-0.250345	0.218421		0.355417	0.110109	-0.153486	0.187936	-0.205936	0.148827		0.274635	0.093178	-0.274343	0.176972	-0.378975	0.12279		0.326851	0.124015	-0.280594	0.18451
14	93-110	ASIEKSNIIRGWIFGTTL	17	2.39066	0.074037	4.03587	0.096588	4.38655	0.093152		0.309004	0.109805	-0.163916	0.122875	-0.264957	0.147662		0.693692	0.166586	0.047474	0.197187	-0.043693	0.144132		0.67387	0.182454	-0.064014	0.100879	-0.271825	0.150979		-0.213393	0.220589	0.325013	0.09745	-0.346426	0.110728		0.011062	0.078457	-0.405091	0.158466	-0.500894	0.130189		0.476898	0.116894	-0.067588	0.100558
15	104-110	WIFGTTL	6	0.713297	0.023988	1.58091	0.045145	1.61557	0.03668		0.196338	0.059216	-0.029216	0.063676	-0.03114	0.038222		0.468999	0.036017	0.006998	0.089975	-0.015164	0.048427		0.589362	0.083774	0.01233	0.066783	-0.074325	0.12046		0.302026	0.048502	-0.00295	0.051898	-0.058084	0.083944		0.223284	0.040951	-0.065536	0.047326	-0.124584	0.03792		0.293405	0.051795	-0.057642	0.046441
16	111-117	DSKTQSL	6	0.737014	0.030985	0.920051	0.028624	1.2151	0.024134		0.080787	0.034561	0.01173	0.060581	0.034692	0.025704		0.053619	0.040195	0.086264	0.069662	0.205451	0.034937		0.090255	0.042397	0.071533	0.032426	0.145358	0.082603		-0.001138	0.033534	-0.071152	0.033687	-0.022496	0.041162		-0.032958	0.036935	-0.049829	0.030754	-0.012435	0.027185		0.01189	0.041244	-0.037229	0.032557
17	114-124	TQSLLIVNNAT	10	1.79562	0.170029	2.35778	0.083508	2.62773	0.260278		0.05869	0.209855	-0.292767	0.124636	-0.51975	0.275866		-0.465096	0.303721	-0.440792	0.147312	-0.343094	0.268841		0.212176	0.177865	-0.143275	0.096302	-0.244306	0.263681		-0.358947	0.19224	-0.543007	0.190037	-0.823112	0.311051		-0.513768	0.202015	-0.566646	0.115285	-0.517161	0.272539		-0.296248	0.260992	-0.354065	0.105833
18	136-143	CNDPFLDV	6	1.2663	0.051889	2.0075	0.059358	2.07225	0.038371		0.250675	0.086926	0.05714	0.099766	-0.166327	0.166913		0.146998	0.074139	-0.069463	0.11738	-0.04844	0.045565		0.186952	0.06998	-0.128525	0.120204	-0.088202	0.062613		0.204456	0.062551	-0.383663	0.064842	-0.084216	0.045286		0.223035	0.110711	0.020966	0.073017	-0.177239	0.101607		-0.019051	0.052131	-0.210617	0.166295
19	168-174	YVSQPFL	5	1.69647	0.08696	2.02692	0.098833	2.23138	0.11467		0.274522	0.114143	0.081143	0.144189	0.086438	0.118152		0.31805	0.114222	0.147955	0.128061	-0.069033	0.135886		0.355594	0.138387	0.052251	0.104864	-0.114467	0.170472		0.036358	0.090851	-0.07028	0.107997	-0.166689	0.18106		0.184826	0.088493	0.005781	0.110564	-0.340373	0.12456		0.188087	0.105639	-0.134966	0.111428
20	175-189	MDLEGKQGNFKNLRE	14	2.51058	0.200106	2.85552	0.069723	3.98195	0.133479		-0.129459	0.211282	-0.281089	0.313305	-0.376211	0.146243		0.037164	0.234088	0.222248	0.160671	-0.166961	0.174478		-0.214871	0.226056	0.043425	0.113852	-0.304657	0.154921		-0.381709	0.253814	-0.418159	0.311616	-1.15267	0.423766		-0.345484	0.251588	-0.195515	0.071787	-0.761007	0.186112		-0.730275	0.206114	-0.609717	0.097898
21	176-189	DLEGKQGNFKNLRE	13	1.84239	0.308437	2.59394	0.161956	3.9055	0.139494		0.321629	0.372228	-0.280213	0.28134	-0.336126	0.199177		0.416678	0.357909	0.22767	0.299618	-0.219299	0.192662		0.302566	0.399901	0.100677	0.278478	-0.391982	0.460633		-0.020209	0.388435	-0.239907	0.226892	-0.623788	0.203314		-0.007918	0.319608	-0.123735	0.192434	-0.828454	0.154107		0.161757	0.367522	-0.0294	0.212625
22	178-189	EGKQGNFKNLRE	11	1.65025	0.122619	2.10209	0.069235	2.96273	0.114058		0.006428	0.148666	0.305261	0.076512	0.407024	0.119298		0.224869	0.12325	0.123778	0.105425	0.2186	0.177328		0.231193	0.131824	0.195622	0.078557	0.01039	0.170901		0.022573	0.149612	-0.054668	0.137149	0.487411	0.114589		0.10819	0.123352	0.323111	0.154408	-0.145018	0.119446		0.097257	0.126495	0.136236	0.08034
23	190-197	FVFKNIDG	7	1.11319	0.092284	1.64581	0.041608	1.62448	0.079871		0.105787	0.12731	-0.095235	0.11757	-0.196112	0.20417		0.33944	0.110927	-0.165472	0.045908	-0.054686	0.095692		0.434516	0.096915	0.003292	0.081467	-0.007123	0.091033		0.036029	0.092992	n.a.	n.a.	-0.237417	0.080688		0.092581	0.134392	-0.423455	0.045572	-0.321767	0.082005		0.296405	0.106092	-0.120116	0.05207
24	190-198	FVFKNIDGY	8	1.1602	0.044044	1.77653	0.070641	2.29676	0.095375		0.18164	0.114099	0.080799	0.134546	-0.190293	0.187268		0.370517	0.120222	0.220504	0.138921	-0.050178	0.129345		0.44201	0.118886	0.226642	0.121661	-0.164024	0.167114		0.197733	0.066264	0.085869	0.082408	-0.0703	0.139706		0.133759	0.056202	-0.072486	0.074924	-0.260266	0.10172		0.220053	0.047759	0.000773	0.079846
25	190-199	FVFKNIDGYF	9	1.09678	0.04787	1.71836	0.08396	2.19859	0.090567		0.160867	0.112363	0.046052	0.140483	-0.123016	0.117641		0.380327	0.069561	0.174324	0.135773	-0.067352	0.104996		0.321526	0.07039	0.135665	0.0923	-0.150002	0.146385		0.069905	0.069955	-0.120324	0.090591	-0.201587	0.130068		-0.005199	0.05112	-0.165418	0.084988	-0.336419	0.093926		0.134014	0.048207	-0.049157	0.087104
26	200-210	KIYSKHTPINL	9	0.854302	0.111432	1.2402	0.09406	1.416	0.073289		0.290288	0.11958	0.127188	0.147339	0.018022	0.074021		0.307352	0.148277	0.111242	0.167878	0.022418	0.101522		0.31683	0.140838	0.095217	0.106953	-0.018607	0.117251		0.16025	0.148853	0.032886	0.109685	-0.109951	0.126345		0.18652	0.112239	-0.006413	0.096963	-0.20374	0.079191		0.343265	0.121715	0.117603	0.099144
27	211-221	VRDLPQGFSAL	9	1.73097	0.174555	2.20989	0.131441	2.22578	0.065768		0.459782	0.190749	0.066514	0.183831	0.301361	0.069237		0.332226	0.17468	0.126506	0.13485	-0.038061	0.08778		0.424245	0.2175	-0.19664	0.223196	-0.053948	0.081778		-0.081528	0.17841	-0.454807	0.138169	-0.374554	0.194591		0.154125	0.317429	-0.041103	0.18891	-0.283115	0.08267		0.270472	0.182906	-0.143121	0.147524
28	211-226	VRDLPQGFSALEPLVD	13	1.59024	0.282941	2.64813	0.075882	3.49513	0.109167		1.50324	0.371497	0.512062	0.104371	1.09933	0.124558		1.16128	0.438618	1.06904	0.18446	0.936278	0.165634		0.92755	0.318786	0.500115	0.093664	0.48533	0.212837		-0.042222	0.381652	-0.517516	0.093668	-0.502988	0.131785		2.38736	0.288464	1.78571	0.137563	1.80636	0.149131		1.86977	0.360026	0.930129	0.12948
29	219-226	SALEPLVD	6	0.22598	0.084262	0.852119	0.06018	1.89829	0.050824		0.063871	0.112117	0.158993	0.199331	-0.151108	0.083018		0.063076	0.091063	0.100312	0.114518	-0.128494	0.08296		1.01028	0.1023	0.377304	0.076954	n.a.	n.a.		-0.145691	0.085058	n.a.	n.a.	n.a.	n.a.		0.886705	0.105579	0.580371	0.117853	-0.034322	0.166476		0.944833	0.09153	0.312132	0.06997
30	240-262	LALHRSYLTPGDSSSGWTAGAAA	21	6.36789	0.16547	7.02534	0.212748	7.67366	0.105269		0.17005	0.187798	-1.35304	0.212942	-0.704724	0.105662		0.390232	0.194866	0.117596	0.23441	-0.557263	0.182864		-0.008474	0.290443	0.215364	0.338152	-0.159522	0.106206		-1.2269	0.274716	-1.21183	0.278622	-0.95752	0.108714		0.233212	0.211146	-0.158255	0.220587	-0.554646	0.106206		n.a.	n.a.	n.a.	n.a.
31	241-263	ALHRSYLTPGDSSSGWTAGAAAY	21	5.07048	0.111004	6.03164	0.2102	6.76992	0.115067		0.791021	0.573378	0.554412	0.210323	-0.348356	0.124333		-1.35083	0.273565	-1.64302	0.222103	-0.556357	0.159394		-2.5252	0.322872	-1.44185	0.223443	-1.30021	0.137779		-2.11155	0.111237	-2.59671	0.210323	-1.39498	0.115292		-2.69139	0.466671	-3.1611	0.233344	-1.71406	0.190584		-2.36094	0.229685	-2.72688	0.227319
32	243-263	HRSYLTPGDSSSGWTAGAAAY	19	5.15543	0.541643	5.55501	0.166901	5.98659	0.486196		0.704489	0.683745	-0.254145	0.41825	0.076389	0.489675		1.01461	0.661018	0.446833	0.247183	0.290536	0.538642		0.560617	0.619646	0.089381	0.278715	0.055216	0.686905		0.170803	0.560961	-0.277882	0.277937	-0.382244	0.486262		0.277502	0.683434	-0.124432	0.191149	-0.662265	0.501153		0.223585	0.649341	-0.419815	0.240206
33	264-274	YVGYLQPRTFL	9	0.726487	0.04729	1.0833	0.041176	1.16071	0.0633		0.122265	0.07958	0.033081	0.084998	0.116277	0.142575		0.12803	0.059412	-0.129942	0.073111	-0.04526	0.098076		0.192401	0.096608	-0.005687	0.081531	0.052926	0.064453		-0.06929	0.062009	-0.164981	0.047892	-0.180987	0.093453		0.002505	0.048056	-0.122735	0.08519	-0.207585	0.07242		0.057442	0.047731	-0.0928	0.049943
34	287-301	VDCALDPLSETKCTL	13	1.50704	0.117988	1.8664	0.158245	2.96871	0.098431		-0.156246	0.125884	-0.018947	0.222079	0.298618	0.108021		0.084452	0.139578	0.126615	0.198569	0.49778	0.157736		0.089874	0.154466	0.097695	0.16699	0.128699	0.098813		-0.117961	0.149268	0.056425	0.158288	-0.944271	0.098499		-0.102274	0.118388	-0.146022	0.160353	-0.43847	0.302835		-0.239116	0.124314	-0.262557	0.159828
35	289-301	CALDPLSETKCTL	11	1.27253	0.090618	1.49874	0.119661	2.35389	0.060053		-0.013128	0.178894	0.245545	0.139655	0.332718	0.073202		0.059632	0.102392	0.151127	0.123746	0.220616	0.074531		0.314273	0.126009	0.290835	0.133542	0.376289	0.125758		-0.232831	0.10666	-0.166461	0.1214	-0.138496	0.067969		-0.490477	0.308896	-0.198513	0.123253	-0.38684	0.082899		n.a.	n.a.	-0.237187	0.123979
36	289-303	CALDPLSETKCTLKS	13	1.50779	0.100935	2.18913	0.111478	3.7689	0.095149		0.184472	0.116976	0.377084	0.151836	0.428917	0.102722		0.188119	0.113844	0.488332	0.15079	0.459975	0.121519		0.317269	0.133928	0.429093	0.114833	0.183689	0.095658		-0.213197	0.109351	-0.10036	0.138514	-0.266099	0.110154		-0.076625	0.101415	0.141453	0.204941	-0.377531	0.200087		-0.156494	0.124084	-0.202297	0.140384
37	304-311	FTVEKGIY	7	1.80753	0.102134	2.22424	0.059915	2.46606	0.024472		0.088507	0.115641	-0.006911	0.13149	0.004029	0.034742		0.008401	0.107637	-0.077121	0.059916	-0.021411	0.072586		0.083132	0.115413	-0.196539	0.060507	-0.04442	0.043678		-0.295502	0.117263	-0.564141	0.060554	-0.324158	0.044399		-0.272241	0.105217	0.067993	0.060507	-0.124344	0.115443		-0.122159	0.106396	-0.33535	0.104751
38	304-316	FTVEKGIYQTSNF	12	3.60708	0.069136	4.10673	0.12546	4.59017	0.087004		-0.251392	0.139328	-0.190709	0.161033	-0.230371	0.112729		-0.306755	0.149076	-0.377195	0.245282	-0.341554	0.099933		-0.256292	0.267619	-0.445037	0.234881	-0.394772	0.239877		-0.584366	0.179542	-0.386285	0.140678	-0.359584	0.278108		-0.475599	0.083567	-0.559179	0.156168	-0.57978	0.209382		-0.358213	0.093011	-0.393144	0.143989
39	305-316	TVEKGIYQTSNF	11	3.29447	0.265881	3.95643	0.098422	4.34802	0.08355		0.166972	0.266472	-0.348053	0.119538	-0.349254	0.090448		0.167876	0.266015	0.355309	0.098783	-0.388211	0.252585		0.156378	0.266336	0.151916	0.122818	-0.025407	0.163555		-0.06472	0.266472	-0.140312	0.247071	-0.090254	0.207535		n.a.	n.a.	n.a.	n.a.	n.a.	n.a.		-0.448955	0.299452	0.009147	0.178161
40	316-323	FRVQPTES	6	2.30461	0.134869	2.46309	0.058591	2.58758	0.017094		0.074159	0.142486	-0.09001	0.096486	-0.119949	0.027409		0.204715	0.163113	0.332537	0.05864	-0.171171	0.018633		0.169499	0.169235	0.402178	0.075055	0.873015	0.01979		-0.296731	0.134955	-0.001927	0.112027	-0.348683	0.198865		-0.0186	0.13598	0.117366	0.099488	0.56253	0.099338		-0.030303	0.192487	0.010275	0.241016
41	330-348	ITNLCPFGEVFNATRFASV	17	2.26743	0.144121	3.56619	0.094331	4.45171	0.076129		0.039282	0.239064	-0.185253	0.211579	-0.136521	0.336749		0.066063	0.151456	-0.735653	0.306328	-0.765101	0.228641		0.57532	0.156114	-0.160951	0.147215	-0.179561	0.281025		n.a.	n.a.	n.a.	n.a.	n.a.	n.a.		n.a.	n.a.	n.a.	n.a.	n.a.	n.a.		0.052946	0.224678	-0.347488	0.265683
42	346-359	ASVYAWNRKRISNC	13	2.01675	0.064304	3.02054	0.072411	5.37053	0.030994		-0.332842	0.074061	-0.475244	0.104392	-0.782804	0.043631		0.076194	0.144011	-0.604483	0.13319	-1.66512	0.115905		0.134214	0.128434	-0.367775	0.149187	-1.42528	0.092996		-0.347727	0.074891	-0.997846	0.099486	-1.93515	0.138762		-0.36848	0.064378	-0.8234	0.218548	-1.94193	0.048845		-0.342501	0.072072	-1.02599	0.092762
43	349-359	YAWNRKRISNC	10	1.64892	0.055208	2.11765	0.027274	2.82422	0.158682		0.027995	0.081874	-0.424249	0.117289	-0.786583	0.255446		-0.242294	0.06698	-0.473472	0.078402	-0.614155	0.174389		-0.16615	0.112475	-0.343479	0.075721	-0.454885	0.169142		-0.494479	0.096752	-0.723948	0.080605	-0.754194	0.205689		-0.410007	0.25306	-0.467613	0.040724	-0.531337	0.186697		-0.598343	0.112295	-0.767576	0.069855
44	349-362	YAWNRKRISNCVAD	13	1.39915	0.0709	2.35958	0.241593	4.29522	0.089237		-0.370741	0.193456	-0.014389	0.253989	-1.43249	0.12339		-0.539742	0.147069	-0.743918	0.243259	-2.01697	0.192694		-0.770133	0.070961	-0.460853	0.35356	-1.98457	0.090332		0.169949	0.076459	0.234627	0.243498	-0.92339	0.227887		-0.774061	0.08811	-0.554468	0.293332	-1.84404	0.133406		-0.780497	0.123847	-0.690897	0.270651
45	360-376	VADYSVLYNSASFSTFK	16	2.24852	0.059776	2.33462	0.064609	3.18494	0.050796		0.645753	0.174247	1.52654	0.144714	1.02805	0.157718		0.705806	0.166697	1.88914	0.237698	1.48143	0.130081		1.03324	0.172268	2.10331	0.207268	1.4533	0.28039		0.008122	0.132191	0.875411	0.184161	0.697492	0.248818		0.735343	0.114932	1.91019	0.077633	1.48588	0.104801		0.836785	0.078416	1.6677	0.083708
46	373-385	STFKCYGVSPTKL	11	2.66511	0.07067	3.3815	0.08575	3.8127	0.133852		0.129981	0.149487	0.157543	0.128239	0.05556	0.154079		-1.82634	0.090023	-1.76093	0.172418	-1.11931	0.13926		-0.540716	0.081062	-1.02043	0.169695	-1.36753	0.185549		0.357666	0.074191	-0.10483	0.091276	-0.002939	0.220257		0.459808	0.071712	0.062102	0.086611	-0.385571	0.134405		0.241796	0.076497	-0.091675	0.085751
47	376-385	KCYGVSPTKL	8	2.24039	0.157804	2.91486	0.091728	3.02667	0.196385		0.187721	0.169446	0.069514	0.133475	0.144375	0.196441		-1.55986	0.170654	-1.37398	0.132776	-0.433372	0.213927		-1.55126	0.165311	-1.84405	0.103322	-0.879155	0.207611		0.084885	0.189671	-0.35268	0.107665	-0.500549	0.31511		0.317275	0.227071	-0.097677	0.137171	-0.130941	0.218827		0.036706	0.158798	-0.36777	0.198476
48	390-397	FTNVYADS	7	0.506183	0.027413	1.10661	0.028256	1.44608	0.016091		-0.133693	0.096017	-0.00716	0.031805	-0.038055	0.042502		-0.043061	0.028933	-0.210426	0.034662	-0.139672	0.026834		n.a.	n.a.	n.a.	n.a.	n.a.	n.a.		-0.155849	0.035612	-0.307896	0.044867	-0.196469	0.02983		n.a.	n.a.	n.a.	n.a.	n.a.	n.a.		-0.047135	0.042032	-0.150595	0.038294
49	391-397	TNVYADS	6	0.395722	0.019461	0.949712	0.018104	1.33945	0.025413		0.029937	0.035254	0.067528	0.027569	-0.073425	0.030565		0.000193	0.036788	-0.134201	0.031686	-0.143288	0.038827		0.038996	0.019714	0.002385	0.02352	-0.061184	0.03187		-0.156209	0.024941	-0.208645	0.026669	-0.211681	0.048		-0.018446	0.04365	-0.063788	0.050955	-0.139908	0.028281		0.009688	0.041709	-0.095697	0.030499
50	391-398	TNVYADSF	7	0.392977	0.031714	0.775479	0.025206	1.09172	0.01543		-0.108663	0.078159	-0.036243	0.046534	-0.111821	0.044514		-0.015437	0.040327	-0.156137	0.030996	-0.228761	0.059999		-0.062344	0.044378	-0.038458	0.057882	-0.01354	0.115702		-0.256051	0.046857	-0.425182	0.041087	-0.252771	0.057452		-0.169776	0.032433	-0.188245	0.026982	-0.474952	0.123334		-0.135332	0.035264	-0.247183	0.060306
51	398-404	FVIRGDE	6	0.175265	0.020795	0.431107	0.029185	1.05806	0.023288		-0.010959	0.026714	-0.005091	0.032326	-0.084797	0.029026		-0.001646	0.031773	-0.218516	0.033977	-0.566215	0.027707		-0.00469	0.037425	-0.213629	0.033525	-0.552418	0.081615		-0.080217	0.024352	-0.279159	0.033222	-0.479445	0.028361		-0.015748	0.113564	-0.345513	0.046868	-0.706152	0.023314		-0.039261	0.022667	-0.260545	0.02926
52	399-418	VIRGDEVRQIAPGQTGKIAD	18	3.07659	0.094029	4.92699	0.082774	7.67503	0.122937		-0.05604	0.134602	-0.264947	0.107819	-0.512589	0.178563		0.05533	0.180466	-0.692735	0.169265	-1.92166	0.142097		0.013396	0.13997	-0.751408	0.191036	-1.81849	0.124917		-0.425423	0.172632	-1.36474	0.113168	-1.6913	0.167562		-0.751983	0.153245	-1.53311	0.11182	-2.53519	0.124404		0.037543	0.142554	-0.954269	0.125516
53	399-419	VIRGDEVRQIAPGQTGKIADY	19	2.95927	0.100162	4.99936	0.036869	8.05803	0.145681		0.079757	0.150898	-0.059802	0.132908	-0.343163	0.156974		0.138379	0.129788	-0.733599	0.162304	-2.06673	0.187329		0.136742	0.165102	-0.809862	0.133199	-2.04336	0.217012		-0.382559	0.153619	-1.35947	0.121508	-1.69581	0.365522		0.093886	0.102376	-1.17082	0.104622	-3.01742	0.173639		0.245664	0.134215	-1.00975	0.109732
54	405-418	VRQIAPGQTGKIAD	12	2.14452	0.164501	3.4541	0.07553	5.02612	0.149577		0.136272	0.196165	-0.079802	0.111995	-0.144881	0.149753		0.159989	0.181524	-0.479741	0.144785	-1.19623	0.160624		0.160248	0.209329	-0.493734	0.124324	-1.08172	0.176495		-0.2252	0.169637	-0.77927	0.100097	-1.08109	0.235041		-0.530231	0.164572	-1.13763	0.095765	-1.4506	0.195164		0.09566	0.17884	-0.800359	0.077994
55	405-420	VRQIAPGQTGKIADYN	14	2.18913	0.135894	3.68043	0.079202	5.84094	0.172548		-0.033047	0.159337	-0.144088	0.15483	-0.252634	0.173435		0.093559	0.175072	-0.787285	0.240861	-1.71792	0.190419		0.082109	0.19701	-0.599835	0.171258	-1.50202	0.236701		-0.314035	0.14749	-1.11888	0.132694	-1.67187	0.314161		-0.653893	0.139124	-1.38894	0.112106	-2.07556	0.215544		-0.086742	0.16807	-1.11891	0.106681
56	420-429	NYKLPDDFTG	8	0.819326	0.064161	1.18342	0.076751	1.99261	0.104423		0.118523	0.073915	0.009189	0.093115	-0.381583	0.117852		0.034596	0.066194	-0.125351	0.096277	-0.502827	0.115237		n.a.	n.a.	n.a.	n.a.	n.a.	n.a.		0.078922	0.11283	-0.301107	0.104078	-0.496002	0.1097		-0.236599	0.078079	-0.302165	0.088716	-1.1166	0.128259		0.042357	0.075081	-0.112604	0.08452
57	421-429	YKLPDDFTG	7	0.791475	0.066168	0.981399	0.043506	1.47557	0.087122		0.104919	0.066743	0.019377	0.057363	-0.000647	0.087576		0.032112	0.077466	-0.086432	0.067518	-0.358764	0.096931		-0.146255	0.079751	-0.104508	0.050268	-0.357344	0.090083		-0.028553	0.079135	-0.2282	0.050441	-0.265329	0.106622		-0.051635	0.067027	-0.216483	0.045009	-0.29961	0.090692		-0.028485	0.074276	-0.1973	0.050096
58	430-439	CVIAWNSNNL	9	1.6845	0.243375	1.99683	0.198506	2.36213	0.054579		0.164681	0.260916	-0.06735	0.222618	0.068106	0.126678		0.319529	0.275167	0.156743	0.240859	0.265713	0.114365		0.141348	0.265493	-0.079302	0.214521	-0.278503	0.131434		-0.098391	0.252553	-0.231194	0.203571	-0.252303	0.118797		-0.136562	0.254039	-0.315509	0.205127	-0.402754	0.07615		0.220553	0.250006	-0.130293	0.202537
59	432-453	IAWNSNNLDSKVGGNYNYRYRL	21	4.0861	0.216107	3.99025	0.061282	4.50689	0.051753		0.274209	0.228801	0.284181	0.067554	-0.308162	0.058342		-0.183634	0.239418	-0.127612	0.081442	0.052775	0.095298		-0.379877	0.255979	0.050728	0.137451	-0.334519	0.140797		-1.68029	0.270477	-0.350119	0.06694	-1.02142	0.165509		-0.629069	0.247449	-0.450661	0.176509	-0.854244	0.064468		-1.38389	0.216975	-1.2505	0.064274
60	440-453	DSKVGGNYNYRYRL	13	3.49883	0.399079	4.28243	0.200025	5.6495	0.101495		0.699834	0.439483	0.436703	0.2549	0.213425	0.124892		0.513039	0.417497	0.223513	0.258115	-0.62657	0.125891		0.58923	0.43104	0.225023	0.215016	-0.175078	0.109469		0.179167	0.431481	-0.318127	0.224045	-1.04653	0.222814		0.557098	0.400689	0.443602	0.233974	-0.589907	0.167045		0.228362	0.440308	-0.526073	0.218539
61	454-465	FRKSNLKPFERD	10	0.952443	0.067138	1.89559	0.074098	2.92831	0.166805		-0.056303	0.088161	-0.047814	0.106474	-0.159277	0.171605		-0.016818	0.12741	-0.026073	0.115703	-0.322116	0.170517		-0.209695	0.329249	-0.057447	0.091341	-0.351216	0.345857		-0.358501	0.077151	-0.878458	0.158866	-1.04633	0.22411		-0.465654	0.145313	-0.830542	0.088466	-0.750226	0.171048		-0.458109	0.093262	-0.985029	0.080871
62	454-469	FRKSNLKPFERDISTE	14	2.90298	0.199614	4.1414	0.150906	5.51773	0.167221		0.092223	0.221419	0.06202	0.188897	-0.225206	0.179136		0.069901	0.26335	-0.122776	0.209041	-0.720399	0.182523		0.142136	0.222157	-0.061302	0.190648	-0.536636	0.179786		-0.122968	0.226494	-0.494322	0.171605	-0.654926	0.214132		-0.21733	0.199798	-0.888474	0.15283	-1.09925	0.175563		-0.072691	0.230023	-0.668501	0.177016
63	469-480	EIYQAGSKPCNG	10	3.3554	0.099333	3.35026	0.028527	3.4391	0.073558		0.065063	0.224485	-0.062237	0.095025	-0.067719	0.076397		0.156389	0.274172	0.123615	0.286086	0.029115	0.144246		-0.121229	0.184072	0.040103	0.38657	0.424146	0.074153		-0.734862	0.100134	-0.57864	0.062325	-0.143283	0.374277		n.a.	n.a.	0.095266	0.030027	0.065861	0.15427		-0.656465	0.099405	-0.28798	0.064796
64	469-484	EIYQAGSKPCNGVEGF	14	4.56806	0.083711	4.46319	0.10983	4.48083	0.12137		-0.501458	0.110987	-0.477135	0.155921	-0.309838	0.123527		-0.261728	0.137163	-0.391579	0.241018	-0.398955	0.148815		-0.249623	0.106092	-0.231182	0.182873	-0.054403	0.184232		-0.838132	0.095607	-0.212149	0.234217	-0.329932	0.200655		-0.824832	0.222361	-0.879185	0.117511	-0.568451	0.123731		-1.77507	0.148775	-0.984468	0.149531
65	485-492	NCYFPLQS	6	1.81924	0.083968	2.43558	0.014708	2.8517	0.112165		0.097132	0.094975	0.072468	0.071574	0.000258	0.114304		0.019855	0.117749	-0.340384	0.085122	-0.400127	0.118314		0.004617	0.089987	-0.293897	0.043774	-0.72802	0.175412		-0.541904	0.096055	-0.558976	0.078996	-0.383899	0.16991		-0.631163	0.110831	-0.380158	0.018211	-0.5071	0.154595		-0.596369	0.098714	-0.881122	0.069271
66	485-493	NCYFPLQSY	7	1.93958	0.177392	2.91755	0.071371	3.28311	0.092977		0.192692	0.202607	-0.029808	0.104419	-0.002268	0.109123		-0.071898	0.197035	-0.542898	0.155489	-0.404055	0.126418		-0.058557	0.183162	-0.412377	0.103303	-0.256182	0.102774		-0.797342	0.251197	-0.661964	0.121059	-0.25307	0.19185		-0.791646	0.220696	-0.521845	0.123288	-0.494132	0.192275		-1.17695	0.178227	-1.3454	0.150503
67	489-510	PLQSYGFQPTNGVGYQPYRVVV	18	5.20471	0.14352	5.33882	0.114459	6.22276	0.209477		-0.380849	0.152329	0.006181	0.192756	-0.01063	0.213208		-0.509376	0.499255	-0.623643	0.240183	-0.797288	0.361446		-0.485534	0.189007	-0.091233	0.236876	-0.444384	0.314331		-1.89484	0.234213	-0.789494	0.212943	-0.858434	0.37341		-1.04513	0.18146	-0.631757	0.203923	-1.30617	0.299826		-0.592673	0.162384	-0.513418	0.161451
68	493-510	YGFQPTNGVGYQPYRVVV	15	3.93415	0.144136	3.96304	0.060431	4.59594	0.118749		-0.270128	0.179568	-0.246875	0.103619	-0.160275	0.128361		-0.009932	0.215777	-0.134953	0.099928	-0.793428	0.16254		-0.098537	0.181245	-0.053562	0.18829	-0.504805	0.120796		-1.73169	0.167243	-1.34118	0.121924	-0.56307	0.217462		-0.529466	0.16919	-0.412737	0.069337	-0.754795	0.152186		-0.212965	0.155145	-0.320854	0.07228
69	493-511	YGFQPTNGVGYQPYRVVVL	16	3.96238	0.228698	4.00529	0.026756	4.64725	0.089714		-0.223553	0.253933	-0.272775	0.07879	-0.215759	0.09164		-0.046769	0.276859	-0.220852	0.209544	-0.768006	0.123558		-0.14638	0.309522	-0.143977	0.138266	-0.514388	0.10122		-1.34613	0.275641	-0.51648	0.113511	-0.738771	0.230647		-0.517447	0.239636	-0.403868	0.114979	-0.804102	0.186677		-0.197237	0.293707	-0.331577	0.093728
70	512-531	SFELLHAPATVCGPKKSTNL	17	3.97506	0.432844	4.47133	0.200806	4.86945	0.260104		-0.328108	0.436414	-0.049638	0.230234	-0.07747	0.26247		0.813972	0.455661	0.211816	0.321536	-0.002847	0.284776		0.903846	0.45886	1.01343	0.218565	0.206253	0.435683		0.114304	0.468736	-0.46463	0.206481	-0.554546	0.390802		n.a.	n.a.	n.a.	n.a.	n.a.	n.a.		0.196887	0.50414	0.078294	0.22217
71	514-531	ELLHAPATVCGPKKSTNL	15	3.36106	0.28073	3.8232	0.156627	4.17142	0.150567		-0.399062	0.296557	-0.307773	0.23546	-0.369093	0.151535		0.566346	0.346142	-0.021205	0.299478	-0.399	0.179986		0.406968	0.340232	0.073393	0.229654	-0.122796	0.208215		0.029732	0.367818	-0.316855	0.214134	-0.593538	0.365534		-0.271269	0.337441	-0.58946	0.162781	-0.726467	0.153199		-0.291232	0.295633	-0.512058	0.204939
72	532-539	VKNKCVNF	7	0.483593	0.03756	0.651746	0.042728	0.758119	0.045102		-0.027875	0.042763	-0.084837	0.063998	0.078784	0.055843		0.088434	0.041234	0.035681	0.055556	0.078517	0.058595		0.085258	0.046854	0.101342	0.047713	0.166097	0.063784		-0.125598	0.0401	-0.211843	0.057123	-0.191307	0.07272		-0.119125	0.085813	-0.046131	0.052662	-0.037691	0.045413		-0.114045	0.040019	-0.176154	0.054019
73	540-550	NFNGLTGTGVL	10	0.937575	0.065844	1.56994	0.044125	1.91223	0.060648		-0.1246	0.083995	-0.285412	0.0971	-0.166276	0.081609		0.599732	0.079664	0.140996	0.094848	-0.076881	0.079372		0.617384	0.106419	0.274718	0.075012	0.090113	0.131951		0.152433	0.087704	0.064216	0.077627	-0.113733	0.124821		0.093611	0.068406	-0.099378	0.048635	-0.271186	0.067667		0.08198	0.073934	-0.067685	0.062796
74	540-566	NFNGLTGTGVLTESNKKFLPFQQFGRD	25	3.57712	0.246071	4.73391	0.22507	6.04477	0.090135		-0.354751	0.251341	-0.073316	0.252298	0.134207	0.13432		0.770392	0.302021	0.640811	0.390194	0.147321	0.19388		0.984859	0.312205	1.03459	0.312113	0.545084	0.39539		0.004154	0.270217	0.120361	0.255296	-0.072392	0.388855		0.124197	0.250961	0.230197	0.27138	-0.01249	0.133331		0.196951	0.309392	0.378444	0.233326
75	542-550	NGLTGTGVL	8	0.461351	0.018108	0.96757	0.008734	1.18775	0.039438		0.111907	0.035076	-0.077635	0.038081	0.053922	0.040884		0.547974	0.029253	0.276128	0.040132	0.285651	0.106071		0.622778	0.048662	0.343802	0.035987	0.248992	0.099303		0.280919	0.036362	0.149787	0.03525	0.069923	0.063039		0.706211	0.171373	0.697604	0.044554	0.531337	0.068031		0.248504	0.04974	0.166557	0.021516
76	551-563	TESNKKFLPFQQF	11	2.71654	0.135173	3.36007	0.035273	4.00807	0.043031		-0.339531	0.147832	-0.308926	0.063673	-0.213971	0.063143		-0.020876	0.172502	-0.160279	0.119657	-0.313547	0.056824		-0.00579	0.185102	-0.046929	0.121145	-0.106952	0.118086		-0.277379	0.169499	-0.416309	0.105187	-0.291367	0.150467		-0.297923	0.135226	-0.400518	0.070259	-0.337877	0.112947		-0.1244	0.164205	-0.083305	0.062088
77	567-573	IADTTDA	6	0.993002	0.049937	1.36832	0.067193	1.50556	0.054844		0.107698	0.08068	-0.048381	0.135105	-0.193764	0.174381		0.05164	0.064799	-0.060108	0.085365	-0.150828	0.080357		0.195571	0.087499	-0.032127	0.101631	-0.090187	0.071717		n.a.	n.a.	n.a.	n.a.	n.a.	n.a.		0.009561	0.053073	-0.118551	0.094421	-0.17817	0.138324		-0.001002	0.066404	-0.182686	0.081047
78	567-580	IADTTDAVRDPQTL	12	1.78435	0.113953	2.9905	0.037567	3.35435	0.04457		-0.101818	0.138582	-0.230623	0.09578	-0.191257	0.050932		-0.149313	0.135334	-0.23775	0.131546	-0.249685	0.090593		-0.05498	0.161332	-0.044276	0.112027	-0.178579	0.203967		-0.462536	0.125081	-0.4287	0.102939	-0.367535	0.160973		-0.615709	0.178275	-0.413421	0.070495	-0.534253	0.073334		0.043269	0.117277	-0.258703	0.062273
79	567-581	IADTTDAVRDPQTLE	13	2.09265	0.119674	3.51604	0.05668	4.03514	0.057078		-0.034878	0.160826	-0.264187	0.143543	-0.129951	0.068768		-0.151861	0.125924	-0.227886	0.101431	-0.241655	0.095064		-0.051834	0.191969	-0.013413	0.088471	-0.039707	0.102342		-0.18268	0.217408	-0.494267	0.157167	-0.432861	0.163909		-0.471774	0.11983	-0.429868	0.108968	-0.49161	0.075532		0.068318	0.127498	-0.270443	0.068883
80	573-580	AVRDPQTL	6	0.989498	0.062734	2.01321	0.052903	2.22527	0.06478		0.057785	0.106849	-0.063151	0.088055	-0.047474	0.083325		-0.153604	0.084933	-0.135602	0.092602	-0.094654	0.090828		-0.062205	0.11053	-0.003454	0.084152	-0.061604	0.104662		-0.335293	0.089449	-0.209484	0.093119	-0.199944	0.093016		-0.2975	0.100633	-0.164891	0.069048	-0.106666	0.215433		0.186206	0.103083	-0.06684	0.084304
81	574-581	VRDPQTLE	6	1.08289	0.091184	2.27573	0.023042	2.52108	0.044585		-0.052047	0.143022	-0.052245	0.05834	0.025891	0.054591		-0.166158	0.1011	-0.028541	0.025736	-0.056077	0.048556		-0.028943	0.125598	-0.038492	0.05045	0.019933	0.094081		-0.367272	0.121859	-0.281937	0.033818	-0.310243	0.087743		n.a.	n.a.	0.031559	0.023785	0.078825	0.123117		0.102426	0.091338	-0.174894	0.066086
82	582-590	ILDITPCSF	7	1.05824	0.08706	1.13504	0.027398	1.19341	0.04503		-0.057792	0.090526	-0.124863	0.063221	-0.041099	0.057095		0.050799	0.099177	-0.090949	0.043172	-0.070744	0.049134		0.023453	0.102334	0.011223	0.046633	0.049661	0.051021		-0.146047	0.098627	-0.138178	0.065988	-0.134728	0.082836		-0.182649	0.095022	-0.212928	0.050479	-0.184985	0.07673		-0.120628	0.119851	-0.199945	0.044839
83	582-594	ILDITPCSFGGVS	11	1.77816	0.171066	2.22979	0.087496	2.20888	0.187359		0.176694	0.192118	-0.087744	0.152399	0.136457	0.19028		-0.020147	0.192202	-0.208091	0.127165	0.048359	0.205217		-0.035148	0.213949	-0.107946	0.164409	0.274891	0.189635		-0.178163	0.21681	-0.383487	0.131996	-0.013987	0.248606		-0.359648	0.21456	-0.336855	0.108575	-0.157769	0.252909		-0.056708	0.200104	-0.185793	0.106198
84	584-590	DITPCSF	5	1.08402	0.079583	1.13195	0.023944	1.1607	0.040747		-0.116233	0.082551	-0.185218	0.06127	-0.079013	0.086654		0.001918	0.087431	-0.049367	0.069301	-0.039526	0.045797		-0.015794	0.091156	0.066424	0.0731	0.038623	0.060719		-0.192994	0.110802	-0.180046	0.048993	-0.147527	0.088013		-0.054759	0.151744	-0.270419	0.024254	-0.246043	0.050577		-0.041661	0.150275	-0.141133	0.08118
85	602-628	TSNQVAVLYQGVNCTEVPVAIHADQLT	25	9.77797	0.431643	9.85868	0.195052	10.5573	0.053344		0.34935	0.471042	-0.151125	0.469659	-0.476839	0.070647		0.365243	0.525517	0.514306	0.271812	-0.310664	0.167419		0.089229	0.491921	0.531635	0.24887	-0.007907	0.2682		0.047769	0.572417	0.165329	0.499934	-0.442471	0.514705		-0.560968	0.432549	-0.307684	0.381098	-0.36276	0.054972		n.a.	n.a.	0.186173	0.343392
86	625-631	DQLTPTW	5	2.31342	0.099579	2.39288	0.051828	2.49128	0.026095		0.059201	0.102104	-0.092565	0.087051	-0.083343	0.02687		0.086732	0.113847	-0.046633	0.067285	-0.15072	0.062529		0.023225	0.114011	-0.081893	0.080065	-0.086936	0.027561		-0.226485	0.118967	-0.026826	0.091126	-0.430072	0.053968		-0.115562	0.101853	-0.276515	0.068604	-0.287147	0.058316		-0.044553	0.132601	-0.084885	0.064948
87	640-648	VFQTRAGCL	8	1.8432	0.148262	2.16693	0.040007	2.34257	0.053749		-0.023026	0.161634	-0.040922	0.0851	0.019407	0.063857		-0.083081	0.177674	-0.160385	0.115466	-0.175149	0.099424		-0.183279	0.159591	-0.03847	0.068834	-0.132239	0.11648		-0.431346	0.164792	-0.38869	0.05746	-0.367263	0.054921		n.a.	n.a.	n.a.	n.a.	n.a.	n.a.		-0.208109	0.157456	-0.325982	0.132196
89	660-669	CDIPIGAGIC	8	0.682446	0.045529	0.947227	0.078844	1.20529	0.051772		0.219452	0.079618	0.293338	0.093477	0.392698	0.112465		0.080156	0.07135	0.101053	0.092515	0.23023	0.090293		0.244049	0.063272	0.219071	0.079736	0.235302	0.055448		-0.140287	0.068324	-0.04994	0.112764	-0.063746	0.108397		-0.062105	0.071405	0.022105	0.096814	0.047687	0.057641		-0.09935	0.063281	-0.152382	0.089115
90	662-669	IPIGAGIC	6	0.696795	0.023046	0.972994	0.05512	1.15286	0.019059		0.225917	0.048019	0.21541	0.071154	0.410028	0.062062		0.004789	0.031331	-0.078952	0.139427	0.251454	0.100632		0.106478	0.042332	0.138452	0.147447	-0.013246	0.033144		-0.199004	0.059179	-0.123519	0.087033	0.213079	0.070145		-0.337347	0.064219	0.016943	0.20435	0.120639	0.025307		-0.064692	0.062777	-0.048751	0.057467
91	662-671	IPIGAGICAS	8	1.11752	0.025361	1.49999	0.070576	1.82075	0.040576		0.371688	0.087275	0.432726	0.115436	0.793247	0.05063		0.148868	0.038398	0.265478	0.083339	0.413736	0.059999		0.312195	0.047399	0.34568	0.082518	0.374171	0.167152		-0.166792	0.049418	-0.158664	0.075475	0.083355	0.052795		-0.289081	0.178958	0.032497	0.107505	0.030135	0.060578		-0.132255	0.038188	-0.071903	0.070927
92	670-688	ASYQTQTNSRGSASSVASQ	18	8.40418	0.081506	9.29332	0.264951	9.68223	0.138636		1.03887	0.156196	-0.359658	0.271775	-0.230217	0.210012		1.27167	0.119376	0.362108	0.282532	-0.210833	0.147306		0.809354	0.117657	-0.127189	0.366929	-0.269919	0.194511		0.670471	0.088138	-0.298372	0.271399	-0.782049	0.142636		1.14056	0.081856	-0.283955	0.312077	-0.106407	0.145297		0.361838	0.174643	-0.207769	0.268648
93	672-692	YQTQTNSRGSASSVASQSIIA	20	7.19992	0.302326	7.34174	0.2271	7.7226	0.137133		0.462644	0.320842	0.111391	0.399328	-0.175171	0.13954		0.626005	0.31803	0.372719	0.301723	-0.129612	0.149159		0.384039	0.30329	0.500863	0.259051	-0.208711	0.13723		0.204219	0.308955	0.242134	0.229686	-0.010798	0.212867		0.214406	0.342605	0.164437	0.289269	0.146514	0.143362		0.112821	0.391353	0.054936	0.230894
94	691-697	IAYTMSL	6	2.14461	0.078409	2.47638	0.046344	2.60043	0.042806		0.096491	0.08893	-0.080429	0.133766	-0.116203	0.052665		-0.103024	0.09097	0.008526	0.056109	0.018777	0.055931		-0.009782	0.103492	-0.061051	0.069504	0.000235	0.042871		-0.499655	0.081669	-0.327036	0.051777	-0.399066	0.061431		-0.531998	0.138065	-0.722517	0.110547	-0.633097	0.06343		-0.2612	0.133458	-0.31002	0.060867
95	692-703	AYTMSLGAENSV	11	4.62017	0.196419	4.95863	0.102336	5.20969	0.055589		0.60366	0.260178	0.221316	0.141327	0.117222	0.06494		0.288077	0.207775	0.248839	0.166739	0.083843	0.08708		0.284917	0.220814	0.411857	0.141313	0.221975	0.242107		0.348547	0.236257	0.130061	0.112839	-0.192832	0.073957		n.a.	n.a.	n.a.	n.a.	n.a.	n.a.		0.156111	0.216081	-0.063453	0.164497
96	715-730	NFTISVTTEILPVSMT	14	2.22986	0.164398	3.7125	0.093015	5.91349	0.181198		0.878709	0.208231	-0.155367	0.094457	-1.8762	0.183189		1.12837	0.211974	0.428609	0.161569	-1.61235	0.184922		0.996263	0.223938	0.302916	0.160933	-1.63622	0.311225		-0.437189	0.180772	-1.07469	0.20642	-2.5698	0.181926		0.358142	0.574389	-0.086313	0.212029	-1.71044	0.192898		0.644241	0.255408	-0.035231	0.124074
97	722-729	TEILPVSM	6	0.58129	0.039053	0.626021	0.035981	0.680046	0.037116		0.005767	0.055023	0.014441	0.061767	-0.012723	0.10062		0.126098	0.073722	-0.072133	0.051043	-0.05513	0.052109		0.027048	0.040235	-0.040655	0.043068	-0.001523	0.039548		-0.095896	0.052447	-0.121236	0.049585	-0.108935	0.050427		-0.079349	0.040871	-0.095889	0.03903	-0.103294	0.037459		-0.1683	0.107007	-0.126608	0.049945
98	723-729	EILPVSM	5	0.057951	0.013869	0.098153	0.015083	0.161169	0.011366		0.06135	0.022474	0.039872	0.039639	0.074833	0.020205		0.006844	0.018863	-0.039619	0.024699	-0.020912	0.014749		0.00303	0.020483	-0.02867	0.018872	-0.008924	0.021331		-0.03926	0.017389	-0.063138	0.017042	-0.089873	0.02015		-0.02554	0.018243	-0.062798	0.019307	-0.074143	0.013832		-0.0224	0.015453	-0.062922	0.016072
99	726-735	PVSMTKTSVD	8	2.21922	0.191198	2.90265	0.134696	3.52731	0.036664		0.308144	0.191232	0.06088	0.136719	-0.595684	0.03684		-0.978687	0.205122	-1.03391	0.204821	-1.41743	0.064997		-0.187139	0.195118	-0.238614	0.142961	-0.630952	0.063693		n.a.	n.a.	n.a.	n.a.	n.a.	n.a.		-0.778907	0.26374	-0.49506	0.154011	-0.641313	0.082305		-1.2319	0.198702	-0.867563	0.145399
100	738-746	MYICGDSTE	8	1.26676	0.066446	1.5475	0.070915	2.14638	0.038469		0.243651	0.159875	0.161611	0.093731	0.116174	0.040147		0.553126	0.079591	1.12252	0.147589	0.873785	0.129048		0.566613	0.107732	1.00416	0.078077	0.672508	0.177065		0.142103	0.075172	0.870635	0.072545	0.583345	0.149425		0.32328	0.123324	0.631874	0.176815	0.983563	0.054096		-0.016691	0.066738	0.064713	0.154516
101	739-746	YICGDSTE	7	1.06893	0.136341	1.17134	0.0338	1.50511	0.04644		-0.043621	0.159099	-0.018678	0.096133	-0.25599	0.047295		0.255675	0.158425	0.264687	0.102113	-0.025142	0.069291		0.197707	0.16574	0.26589	0.060265	-0.030946	0.065617		-0.142586	0.165291	0.008692	0.035318	-0.227557	0.098043		0.366797	0.146803	0.570293	0.134215	0.512117	0.125573		-0.180368	0.182039	-0.242254	0.089827
102	751-757	LLQYGSF	6	1.79457	0.105098	2.15128	0.033208	2.35198	0.028782		-0.060501	0.113364	-0.081751	0.067857	-0.172713	0.036901		0.205327	0.105334	-0.011991	0.052342	-0.207578	0.03479		0.239543	0.145226	0.01667	0.062238	-0.116787	0.097554		0.021284	0.120777	-0.045989	0.046561	-0.182112	0.081551		-0.149014	0.109839	-0.211136	0.04905	-0.354377	0.043621		0.02697	0.115752	0.007092	0.047183
103	762-780	NRALTGIAVEQDKNTQEVF	18	1.62919	0.056514	3.62961	0.079434	6.02944	0.037058		0.25376	0.190911	0.164311	0.238591	0.306001	0.042025		0.655753	0.086729	1.01133	0.190766	0.219779	0.1372		0.692794	0.12748	1.03013	0.133241	0.554908	0.295705		0.29639	0.083209	0.48183	0.094896	0.318306	0.230757		0.0814	0.065517	0.23594	0.113618	-0.018614	0.128046		0.216634	0.077957	-0.007358	0.086202
104	768-780	IAVEQDKNTQEVF	12	0.534114	0.061407	1.15321	0.060573	2.56727	0.076476		0.02942	0.118838	0.187637	0.190421	0.11037	0.107114		0.011386	0.080859	0.207973	0.090082	-0.090882	0.09665		-0.042367	0.077225	0.217248	0.079051	0.212529	0.085859		-0.156564	0.089105	-0.051681	0.090255	-0.082891	0.16103		-0.228688	0.068599	-0.435853	0.067853	-0.966334	0.082362		-0.264364	0.072299	-0.283327	0.068881
105	781-794	AQVKQIYKTPPIKD	11	3.92883	0.090705	4.74646	0.120964	5.39635	0.049209		0.399651	0.129647	-0.140778	0.175597	-0.217951	0.066799		0.319659	0.158673	0.264714	0.204215	-0.098353	0.062138		0.287493	0.148944	0.203606	0.148164	0.006701	0.272299		-0.303973	0.172545	-0.387137	0.214381	-1.09615	0.204421		-1.22021	0.298664	-0.838516	0.217582	-0.783775	0.055879		-0.760806	0.094556	-1.11286	0.157285
106	801-820	SQILPDPSKPSKRSPIEDLL	15	1.38217	0.30132	1.77089	0.208415	2.93286	0.359056		0.232772	0.53588	-0.115166	0.323902	0.238035	0.468446		0.242786	0.719689	-0.044312	0.364291	-0.043258	0.733731		0.322426	0.393441	-0.129221	0.500009	-0.383374	0.579011		-0.077908	0.323883	-0.427961	0.249228	-0.94299	0.411179		n.a.	n.a.	n.a.	n.a.	n.a.	n.a.		0.332343	0.583753	-0.074849	0.397443
107	820-826	LFNKVTL	6	2.44148	0.138055	2.48801	0.058297	2.55779	0.015251		0.045744	0.142696	-0.111389	0.08707	-0.145839	0.028954		0.064928	0.172525	-0.054598	0.06088	-0.131608	0.021806		-0.025925	0.154274	-0.005259	0.090919	-0.045185	0.064714		0.000394	0.180855	-0.173386	0.192139	-0.114532	0.059787		-0.519869	0.139127	-0.262936	0.206008	-0.327485	0.131664		0.010116	0.151481	0.150054	0.06475
108	820-831	LFNKVTLADAGF	11	4.13009	0.355077	4.09569	0.082436	4.49922	0.046876		0.078857	0.356246	-0.012321	0.10244	-0.342742	0.062039		0.371242	0.384461	0.257047	0.153771	-0.346848	0.116707		0.192506	0.394517	0.217049	0.139454	-0.267357	0.171768		-0.090235	0.375587	0.175575	0.115405	-0.243025	0.263184		-0.350329	0.369953	-0.24206	0.082721	-0.538189	0.372944		-0.157377	0.355179	0.073749	0.184715
109	828-850	DAGFIKQYGDCLGDIAARDLICA	22	3.51783	0.295835	4.00346	0.176741	4.32981	0.098572		0.02375	0.332349	-0.187067	0.208985	-0.041543	0.099803		0.502616	0.448916	-0.567774	0.193319	0.054332	0.210484		0.557121	0.497893	-0.454011	0.220433	-0.105618	0.128423		-0.033453	0.336515	0.038104	0.205182	-0.018321	0.227338		-0.047879	0.30758	-0.375018	0.238435	0.028808	0.117805		0.242587	0.308346	-0.046033	0.196965
110	832-839	IKQYGDCL	7	2.32091	0.178674	2.33275	0.05056	2.57072	0.019471		0.190406	0.18157	0.046257	0.106997	-0.105436	0.05185		0.130868	0.205776	0.009758	0.138799	-0.199104	0.093154		0.139744	0.191463	0.097534	0.063062	-0.144541	0.110306		-0.200695	0.34563	-0.27492	0.219409	-0.397597	0.100537		-0.493032	0.182437	-0.352075	0.05854	-0.392652	0.034962		-0.154267	0.224372	-0.192784	0.150492
111	832-846	IKQYGDCLGDIAARD	14	5.1616	0.037601	5.30597	0.154783	5.73154	0.057654		0.373463	0.085288	0.006701	0.18979	-0.387187	0.092161		0.695078	0.225145	0.386732	0.16296	-0.069998	0.206657		0.578406	0.175498	0.552807	0.155627	0.022162	0.164566		n.a.	n.a.	n.a.	n.a.	n.a.	n.a.		0.573316	0.043165	0.366069	0.246078	0.225708	0.061503		-1.46582	0.2234	-1.0185	0.155903
112	850-863	AQKFNGLTVLPPLL	11	2.71493	0.151464	4.24792	0.175297	4.69375	0.2442		-0.524556	0.461693	-0.347616	0.375035	0.171806	0.24568		0.065379	0.334492	-0.03832	0.339518	0.110186	0.282327		0.25036	0.184162	-0.641397	0.348534	-0.5524	0.634485		-0.109471	0.268403	-0.022666	0.200282	0.412335	0.278443		-0.393177	0.170549	-0.44727	0.178675	0.167252	0.695664		-0.303033	0.173759	-0.293996	0.425533
113	856-863	LTVLPPLL	5	1.39721	0.031062	2.04344	0.016031	2.6053	0.016897		0.063899	0.054804	0.011029	0.033894	0.033163	0.02485		0.216016	0.081452	0.315389	0.118558	0.060191	0.020855		0.188973	0.038963	0.209653	0.128332	-0.003833	0.020685		0.015654	0.048555	-0.057518	0.028798	-0.034826	0.036099		-0.056353	0.036381	-0.071948	0.020982	-0.056911	0.024718		0.001437	0.034887	-0.01684	0.028056
114	856-864	LTVLPPLLT	6	1.63152	0.035271	2.42758	0.020293	3.47784	0.010557		0.133616	0.061372	0.079178	0.024864	0.001545	0.011744		-0.001012	0.038534	0.238139	0.075844	0.043191	0.020949		0.057929	0.063692	0.203294	0.076877	0.088338	0.141699		-0.108713	0.081776	-0.017518	0.044242	-0.044838	0.089711		-0.170682	0.035616	-0.098063	0.026375	-0.116388	0.013893		-0.078971	0.036355	-0.014372	0.050374
115	857-863	TVLPPLL	4	0.703366	0.03185	1.29928	0.028127	1.8709	0.030227		0.143144	0.05143	0.070902	0.041622	0.010779	0.040833		0.057362	0.042076	0.15246	0.051907	0.056309	0.043187		0.132058	0.036686	0.150143	0.047626	0.073212	0.066418		-0.011912	0.04576	-0.027574	0.038753	-0.050096	0.052123		-0.023526	0.035493	0.026223	0.029509	-0.017497	0.030874		0.012964	0.044132	-0.004085	0.038208
116	857-864	TVLPPLLT	5	0.98294	0.022796	1.75691	0.018315	2.75067	0.015679		0.1436	0.051975	0.102636	0.033088	-0.012896	0.051329		-0.047369	0.030881	0.244439	0.05452	0.066958	0.025594		0.056884	0.055464	0.196639	0.052058	0.06322	0.103089		-0.05045	0.053144	-0.049529	0.025837	-0.042942	0.052205		-0.123854	0.026325	-0.045425	0.024132	-0.088336	0.016647		-0.104645	0.03094	-0.01718	0.029987
117	876-883	LAGTITSG	7	0.473486	0.050127	0.669198	0.048353	0.883598	0.142087		0.120102	0.089613	0.013936	0.10207	0.112793	0.15661		-0.160496	0.07021	-0.201389	0.066228	-0.231071	0.169345		-0.143598	0.067049	-0.260791	0.060566	-0.249944	0.157991		-0.235162	0.052859	-0.404134	0.075417	-0.381172	0.151747		-0.308168	0.107733	-0.309922	0.064447	-0.449349	0.153333		-0.227554	0.060926	-0.296553	0.058835
118	884-899	WTFGAGPALQIPFPMQ	12	0.867757	0.071956	1.32357	0.009632	1.07156	0.009632		0.316858	0.071956	-0.375815	0.009632	0.055171	0.120812		-0.353043	0.095891	0.110034	0.130176	0.302043	0.153859		0.038878	0.072598	-0.742286	0.064693	-0.031781	0.057037		0.071192	0.078378	-0.555175	0.009695	0.068117	0.125537		0.109809	0.112522	-0.232279	0.048778	0.125908	0.077486		-0.436981	0.124016	-0.568875	0.060816
119	884-900	WTFGAGPALQIPFPMQM	13	0.633496	0.203488	1.4312	0.095477	0.880071	0.094638		0.652646	0.326598	n.a.	n.a.	0.315265	0.097989		0.361457	0.223141	0.205857	0.101958	0.762396	0.116044		n.a.	n.a.	-0.59368	0.142229	0.257737	0.141307		0.40165	0.207374	-0.55787	0.095913	0.301233	0.094776		0.394888	0.229206	-0.329625	0.148973	0.327533	0.138072		0.150612	0.335228	-0.282349	0.109422
120	885-908	TFGAGPALQIPFPMQMAYRFNGIG	20	2.04133	0.199389	3.18296	0.117126	3.93529	0.204637		0.258435	0.23154	-0.235218	0.176588	-0.368724	0.215507		0.386813	0.202169	-0.041737	0.11901	-0.311406	0.228918		0.246522	0.211276	-0.108908	0.131079	-0.347788	0.206146		n.a.	n.a.	n.a.	n.a.	n.a.	n.a.		0.055617	0.200937	-0.416926	0.125661	-0.551699	0.206146		n.a.	n.a.	n.a.	n.a.
121	890-900	PALQIPFPMQM	7	1.03773	0.122099	1.43745	0.057523	1.76707	0.050557		0.294448	0.122416	0.252055	0.058572	-0.128523	0.105472		-0.048356	0.136552	-0.170528	0.077779	-0.130208	0.226904		0.107862	0.132337	-0.152951	0.221476	-0.332838	0.071123		-0.114446	0.134686	-0.442709	0.078917	-0.278459	0.145079		-0.055531	0.155692	-0.264931	0.118267	-0.423835	0.184788		-0.222742	0.14793	-0.42788	0.116032
122	900-914	MAYRFNGIGVTQNVL	14	2.26686	0.153261	3.04445	0.058288	4.33693	0.097156		0.469928	0.189268	0.309855	0.264774	0.399202	0.123081		-0.033594	0.168304	-0.23678	0.149992	-0.202884	0.147079		-0.02984	0.184814	-0.114021	0.098229	-0.157952	0.17336		-0.137767	0.201457	-0.394438	0.073812	-0.311088	0.211715		-0.279619	0.178961	-0.447686	0.077793	-0.506218	0.113702		-0.177388	0.181167	-0.394355	0.085932
123	901-911	AYRFNGIGVTQ	10	1.93787	0.151845	2.5665	0.033597	3.63139	0.073797		0.279257	0.167277	0.103118	0.173339	0.134171	0.075459		0.155766	0.152892	n.a.	n.a.	-0.205191	0.075952		0.043913	0.208419	-0.135964	0.156425	0.03927	0.11509		-0.501765	0.152108	n.a.	n.a.	n.a.	n.a.		-0.053673	0.154311	-0.686111	0.043401	-0.493564	0.078745		-0.175607	0.203202	-0.205329	0.044684
124	905-914	NGIGVTQNVL	9	1.65551	0.097924	2.07931	0.013628	3.03683	0.043279		0.17679	0.103063	0.189601	0.097434	0.126021	0.044322		-0.099638	0.098787	-0.08655	0.075647	-0.114975	0.060621		-0.007836	0.112674	-0.023362	0.063167	-0.092548	0.114865		-0.248315	0.102349	-0.144808	0.027927	-0.189423	0.119272		-0.278982	0.10515	-0.256614	0.06204	-0.267844	0.108406		-0.237329	0.102365	-0.143942	0.016798
125	915-922	YENQKLIA	7	1.74572	0.118068	1.96385	0.036808	2.15616	0.049852		0.117589	0.145071	-0.053128	0.065195	0.109269	0.05332		-0.081286	0.121477	-0.180722	0.046598	-0.104156	0.091391		0.067722	0.141143	-0.04912	0.038055	-0.060622	0.097964		-0.20494	0.156401	0.019569	0.041384	-0.209126	0.130768		-0.040963	0.145874	-0.072205	0.095286	-0.254719	0.247118		-0.10815	0.121477	n.a.	n.a.
126	915-936	YENQKLIANQFNSAIGKIQDSL	21	6.4238	0.37277	8.31695	0.233947	10.8209	0.146232		0.881107	0.438136	0.018292	0.372855	-0.215552	0.147263		0.753327	0.459278	-0.273071	0.403976	-0.313643	0.214629		0.512291	0.399852	-0.344672	0.308269	-0.647086	0.236528		n.a.	n.a.	n.a.	n.a.	n.a.	n.a.		0.278485	0.374038	-0.859974	0.244197	-0.907176	0.149436		0.194082	0.37441	-0.681465	0.272413
127	921-928	IANQFNSA	7	0.447678	0.036218	0.973546	0.043039	1.86262	0.059241		0.134922	0.052462	0.011425	0.090654	-0.036094	0.066659		0.077401	0.037614	-0.04304	0.04422	-0.184351	0.085442		0.109108	0.06153	-0.114186	0.0475	-0.133343	0.1133		-0.012505	0.078248	-0.118463	0.094463	-0.063904	0.132342		0.194644	0.041421	-0.204976	0.089889	-0.475643	0.062557		-0.007797	0.038896	-0.192709	0.077427
128	923-936	NQFNSAIGKIQDSL	13	4.5034	0.222156	5.09797	0.128561	6.25025	0.066479		0.215476	0.273941	-0.149724	0.224919	-0.161274	0.087027		0.166993	0.240189	-0.090604	0.19893	-0.34133	0.100104		0.128985	0.262556	-0.805272	0.17307	-0.832275	0.547004		-0.20613	0.271045	-0.426573	0.128569	-0.859939	0.205648		-0.929516	0.224574	-0.57317	0.132561	-1.50748	0.076273		-1.34924	0.311225	-0.402399	0.16477
129	926-936	NSAIGKIQDSL	10	3.96179	0.135547	4.43786	0.043282	4.97903	0.094579		0.218932	0.167208	-0.23497	0.081269	-0.226632	0.095789		0.241436	0.158782	-0.06948	0.099124	-0.171044	0.114158		0.276372	0.143376	0.041383	0.067015	-0.095603	0.184635		-1.52493	0.136366	n.a.	n.a.	n.a.	n.a.		-0.237728	0.135629	-0.617833	0.291495	-0.861264	0.105205		0.04569	0.170455	-0.37827	0.061783
130	926-943	NSAIGKIQDSLSSTPSAL	16	6.76011	0.411284	7.29111	0.157211	8.107	0.115932		0.514567	0.434707	-0.35647	0.258129	-0.543873	0.129595		0.372624	0.625216	-0.089416	0.172155	-0.322991	0.118385		0.301207	0.411303	-0.090339	0.176135	-0.047565	0.116002		-0.411667	0.432127	-0.475909	0.323648	-0.82743	0.51642		-0.009718	0.415147	-0.59094	0.346707	-1.06207	0.521523		0.039914	0.498265	-0.409064	0.289526
131	944-959	GKLQNVVNQNAQALNT	15	7.73579	0.470642	9.4106	0.219465	9.77293	0.273564		0.69133	0.531358	-0.125738	0.299282	0.007764	0.310698		1.29947	0.507383	0.263716	0.227238	-0.116174	0.364975		1.57955	0.510384	0.655586	0.22973	-0.013324	0.413287		0.820491	0.51872	-0.099201	0.228189	-0.165028	0.291626		n.a.	n.a.	n.a.	n.a.	n.a.	n.a.		0.387225	0.510318	0.080241	0.327711
132	953-959	NAQALNT	6	2.55911	0.050802	3.4685	0.020284	3.51445	0.033495		0.153343	0.100679	-0.093032	0.059461	0.053341	0.040289		0.524849	0.108999	0.02842	0.037409	0.016185	0.049245		0.807769	0.132629	0.118343	0.073652	0.116541	0.13124		0.854762	0.107111	0.281632	0.129799	0.05704	0.191982		-0.171596	0.129559	-0.409157	0.024965	-0.199255	0.036518		-0.221377	0.07061	-0.163707	0.027785
133	958-968	NTLVKQLSSNF	10	2.48178	0.119778	5.24442	0.123173	6.23533	0.028669		0.853526	0.253345	0.060567	0.125692	-0.048739	0.163275		2.38117	0.163734	0.685112	0.201505	-0.044311	0.170888		2.64777	0.167238	0.545265	0.256453	0.172626	0.276595		n.a.	n.a.	n.a.	n.a.	n.a.	n.a.		n.a.	n.a.	n.a.	n.a.	n.a.	n.a.		-0.024056	0.145341	-0.274905	0.126581
134	960-968	LVKQLSSNF	8	2.10787	0.096263	3.41583	0.05447	3.71483	0.044557		0.2248	0.129343	-0.171161	0.104208	-0.264211	0.056908		1.29095	0.099873	0.047048	0.089529	-0.234516	0.057049		1.36055	0.132268	0.134603	0.112768	-0.148762	0.115361		0.86272	0.121573	0.106718	0.064631	-0.29477	0.125148		0.746413	0.104036	-0.150201	0.068864	-0.362984	0.045895		0.095836	0.108655	-0.23748	0.072258
135	960-975	LVKQLSSNFGAISSVL	15	4.92098	0.292055	7.43907	0.175392	8.0803	0.174016		0.761544	0.400188	-0.025722	0.28807	-0.422244	0.248555		2.76864	0.313977	0.304697	0.249167	-0.359647	0.307112		2.72633	0.348106	0.260357	0.234743	-0.320703	0.313382		1.96417	0.386224	-0.000845	0.260182	-0.608221	0.294536		1.75479	0.301045	0.007932	0.196243	-0.66181	0.211401		0.527693	0.353341	-0.074285	0.200371
136	961-975	VKQLSSNFGAISSVL	14	4.31355	0.103211	6.17545	0.143634	n.a.	n.a.		0.184001	0.208137	-0.409515	0.239729	n.a.	n.a.		1.97264	0.165988	-0.252981	0.264926	n.a.	n.a.		1.4293	0.457237	0.063627	0.217311	n.a.	n.a.		1.01387	0.277451	-0.348221	0.186449	n.a.	n.a.		0.628735	0.421289	-0.699586	0.144307	n.a.	n.a.		0.092515	0.104637	-0.367967	0.416918
137	968-975	FGAISSVL	7	2.3584	0.053591	3.15023	0.02824	3.24755	0.015474		0.045807	0.09469	-0.147669	0.079681	-0.189283	0.030916		0.753383	0.061993	-0.066982	0.060334	-0.199518	0.02365		0.730124	0.079689	-0.001124	0.077433	-0.109813	0.128237		0.429315	0.07834	-0.152907	0.059477	-0.237332	0.08129		0.331134	0.05507	-0.196877	0.079486	-0.231886	0.04747		0.03868	0.075004	-0.157677	0.038298
138	978-988	ILSRLDPPEAE	8	1.97316	0.096892	2.75136	0.063809	2.90832	0.037266		-0.005758	0.135632	-0.147264	0.071146	-0.316135	0.161084		0.617354	0.116253	-0.683419	0.127252	-0.149019	0.059109		0.538325	0.206099	-0.14814	0.21886	-0.049328	0.117316		0.459128	0.103792	-0.062418	0.076721	-0.256929	0.113945		0.024749	0.15789	-0.207248	0.107111	-0.05926	0.099982		-0.043805	0.101994	-0.355984	0.268036
139	980-987	SRLDPPEA	5	1.21004	0.035596	1.83828	0.019522	1.86598	0.009181		0.053498	0.054213	-0.07529	0.035115	-0.06869	0.031981		0.624911	0.044164	0.023589	0.060767	0.047262	0.020809		n.a.	n.a.	n.a.	n.a.	n.a.	n.a.		0.362328	0.042102	-0.236398	0.194546	-0.361153	0.143427		0.225922	0.109088	-0.228254	0.026828	-0.186322	0.04584		-0.1494	0.143488	-0.469785	0.107022
140	980-988	SRLDPPEAE	6	1.47069	0.058024	2.2149	0.041659	2.29663	0.035423		0.138238	0.093129	-0.100277	0.057049	-0.105861	0.037487		0.765681	0.090565	0.007751	0.087762	-0.08455	0.053589		0.775125	0.099857	0.031449	0.081683	-0.062541	0.106261		0.527375	0.077787	-0.159931	0.146138	-0.326815	0.109479		0.386693	0.098585	-0.161639	0.049862	-0.202831	0.055422		0.066486	0.105925	-0.290151	0.126405
141	988-999	EVQIDRLITGRL	11	0.532255	0.057204	1.42432	0.157222	2.98305	0.116717		0.003475	0.120674	0.368325	0.211563	0.369009	0.128021		1.15905	0.084651	2.70703	0.268002	2.78834	0.179939		1.62671	0.071434	2.81349	0.157822	2.59781	0.218776		0.612013	0.145847	1.33987	0.304493	2.14062	0.192164		0.259451	0.06149	0.682362	0.276679	2.39297	0.216122		-0.052638	0.111461	0.100299	0.182615
142	990-999	QIDRLITGRL	9	0.345591	0.120479	0.963487	0.148015	2.1724	0.121006		0.015428	0.145805	0.123854	0.187476	0.388886	0.173558		0.741079	0.130305	2.36154	0.174239	2.68146	0.191298		1.06273	0.196955	2.24316	0.242568	2.77348	0.442518		0.258625	0.204399	1.29164	0.148755	2.25727	0.12191		-0.0302	0.179262	0.488952	0.383068	1.77763	0.288205		-0.136394	0.142783	-0.028919	0.289486
143	991-998	IDRLITGR	7	0.178036	0.060316	0.318681	0.120064	1.196	0.069802		0.098947	0.088562	0.171189	0.124521	0.089558	0.078534		0.513833	0.072614	1.89651	0.149455	2.30413	0.083008		0.616756	0.110926	1.81158	0.152731	2.18285	0.192722		0.244005	0.084121	0.883933	0.124759	1.55751	0.10004		0.034035	0.166886	0.726406	0.151657	1.46654	0.089849		0.132333	0.075928	0.187836	0.125467
144	991-999	IDRLITGRL	8	0.537273	0.055522	0.579882	0.074439	1.36555	0.054343		-0.061942	0.224088	-0.028044	0.219975	1.14393	0.106019		-0.046438	0.103678	1.81633	0.222064	2.3593	0.139437		0.106331	0.184729	1.67115	0.176214	2.30214	0.243968		0.060185	0.194958	0.753793	0.199551	1.7371	0.157842		-0.175135	0.055716	0.924013	0.092478	2.03075	0.068956		-0.445429	0.075645	-0.200687	0.18257
145	995-1004	ITGRLQSLQT	9	0.443538	0.054909	0.995638	0.043179	1.79465	0.020489		0.020368	0.065845	0.020757	0.065952	0.23618	0.037963		2.062	0.117979	1.73117	0.204076	1.27058	0.076642		1.87885	0.265147	1.90617	0.10182	0.924752	0.218666		1.71378	0.142235	1.64943	0.089484	1.23415	0.285008		1.0042	0.621074	1.66381	0.066789	1.02026	0.043425		1.96656	0.097256	1.79484	0.045933
146	1005-1013	YVTQQLIRA	8	0.221476	0.033923	0.438319	0.075931	1.09166	0.028577		0.059497	0.038945	-0.022445	0.08719	-0.008841	0.163903		0.029461	0.036415	0.010214	0.076323	-0.023206	0.047618		0.025945	0.051552	0.006982	0.089697	-0.087326	0.185226		-0.08303	0.037008	-0.135562	0.085186	-0.133046	0.031919		-0.08975	0.03728	-0.153984	0.101339	-0.3128	0.056391		n.a.	n.a.	n.a.	n.a.
147	1014-1022	AEIRASANL	8	0.328872	0.004175	0.683637	0.033726	2.01728	0.034161		0.220748	0.036844	0.238111	0.092063	0.254579	0.03783		0.286424	0.006171	0.022483	0.160606	-0.158586	0.041082		0.047894	0.042835	-0.042624	0.037943	-0.207108	0.039546		-0.026699	0.010377	-0.16	0.033997	-0.185432	0.072405		-0.033675	0.025787	-0.097539	0.045465	-0.332751	0.040252		-0.055002	0.018466	-0.131418	0.040991
148	1023-1029	AATKMSE	6	0.24528	0.040221	0.304669	0.027918	0.346569	0.01506		0.044793	0.041275	0.08729	0.037117	0.130861	0.04928		0.025632	0.044532	-0.002158	0.033014	0.025035	0.036143		0.045251	0.0493	0.049157	0.033527	0.063862	0.101775		-0.107695	0.040831	-0.105043	0.02991	-0.133473	0.016125		-0.063541	0.042215	0.007216	0.071715	-0.066504	0.04988		0.064622	0.190101	-0.002851	0.202413
149	1030-1040	CVLGQSKRVDF	10	1.68219	0.19334	2.21572	0.092679	2.54698	0.090961		-0.027674	0.216933	-0.046968	0.109782	-0.119799	0.106286		0.066335	0.207006	-0.146845	0.161095	-0.245111	0.169642		0.061428	0.225163	-0.047558	0.13083	-0.089704	0.168353		-0.27333	0.209434	-0.258717	0.107589	-0.356293	0.17887		0.205939	0.205915	-0.27351	0.215784	0.006973	0.110593		-0.118339	0.225198	-0.339102	0.133955
150	1030-1044	CVLGQSKRVDFCGKG	14	2.33957	0.14787	3.0309	0.078615	3.47475	0.106665		-0.141829	0.162294	-0.200644	0.093502	-0.016833	0.110463		0.207712	0.284996	-0.08946	0.111863	-0.107793	0.126783		-0.423156	0.14792	-0.850649	0.266728	-0.007053	0.106734		-0.597416	0.541323	-0.376879	0.465197	0.472715	0.202493		-0.71793	0.153247	-0.462187	0.372094	-0.371491	0.472171		-0.023981	0.425185	n.a.	n.a.
151	1030-1047	CVLGQSKRVDFCGKGYHL	17	2.04103	0.306114	2.77314	0.211509	3.43115	0.234751		0.563797	0.335227	-0.101025	0.267474	-0.072286	0.271623		n.a.	n.a.	-0.314703	0.254446	-0.20098	0.2709		n.a.	n.a.	n.a.	n.a.	n.a.	n.a.		-0.136649	0.432999	-0.371937	0.267713	-0.609696	0.372768		n.a.	n.a.	n.a.	n.a.	n.a.	n.a.		0.344294	0.334641	-0.492692	0.277566
152	1032-1040	LGQSKRVDF	8	1.21723	0.114797	1.68078	0.07257	1.91	0.095547		-0.235855	0.242272	-0.183739	0.176578	-0.215523	0.287203		n.a.	n.a.	n.a.	n.a.	-0.340852	0.113267		n.a.	n.a.	n.a.	n.a.	-1.0956	0.095646		-0.209257	0.128299	-0.334887	0.106855	-0.238371	0.155275		-0.445885	0.166776	-0.936973	0.158494	-1.32904	0.113616		-0.219043	0.186428	-0.399407	0.106128
153	1032-1047	LGQSKRVDFCGKGYHL	15	1.82096	0.241117	2.44961	0.169142	3.08224	0.279517		-0.076324	0.333533	-0.078966	0.27996	-0.096203	0.349854		0.062064	0.345473	-0.100442	0.282091	-0.308424	0.341195		n.a.	n.a.	n.a.	n.a.	n.a.	n.a.		-0.139323	0.297947	-0.198749	0.238586	-0.104874	0.378212		-0.599514	0.281584	-0.623973	0.390775	-0.455136	0.40905		-0.032372	0.287545	-0.178109	0.308748
154	1033-1047	GQSKRVDFCGKGYHL	14	1.80687	0.277034	2.39598	0.173544	3.00596	0.33139		-0.34171	0.283803	-0.009589	0.231892	-1.76978	0.334198		0.302518	0.283088	0.021574	0.22249	-0.427512	0.336467		n.a.	n.a.	0.043177	0.174247	n.a.	n.a.		n.a.	n.a.	n.a.	n.a.	n.a.	n.a.		0.551549	0.286508	0.517778	0.205191	-0.568114	0.348053		-0.12451	0.283088	0.10843	0.247716
155	1041-1047	CGKGYHL	6	0.502526	0.082488	0.636553	0.062971	0.859655	0.072341		-0.05192	0.109009	-0.046717	0.101014	-0.052859	0.094085		0.026489	0.108301	-0.087323	0.094199	-0.092219	0.101276		-0.001031	0.104284	-0.131527	0.090989	-0.09084	0.090869		-0.124619	0.122148	-0.17784	0.094349	-0.167979	0.11002		n.a.	n.a.	n.a.	n.a.	n.a.	n.a.		-0.085849	0.10148	-0.192365	0.166494
156	1048-1060	MSFPQSAPHGVVF	10	0.366057	0.010128	0.426208	0.105804	0.618005	0.028669		-0.173783	0.017549	-0.106022	0.1205	-0.12283	0.13106		-0.037737	0.013929	-0.098481	0.108433	-0.17785	0.050265		-0.024966	0.023726	-0.114795	0.106988	-0.159518	0.12696		-0.190439	0.02603	-0.26572	0.107409	-0.285955	0.042389		-0.23573	0.03022	-0.205532	0.124593	-0.383725	0.034175		-0.080857	0.040392	-0.105699	0.111233
157	1051-1061	PQSAPHGVVFL	8	0.328302	0.012908	0.340067	0.059181	0.488273	0.058068		0.048212	0.032919	0.051635	0.107856	-0.135254	0.058461		-0.044097	0.078138	0.027231	0.063585	-0.100952	0.061148		0.073312	0.135371	0.374208	0.187353	0.422326	0.058937		-0.029756	0.135683	0.103051	0.09286	0.153615	0.114374		0.002539	0.038945	-0.060983	0.068798	-0.08234	0.062942		-0.037516	0.035989	-0.066895	0.063758
158	1077-1093	PAICHDGKAHFPREGVF	14	0.996427	0.106929	1.37808	0.109375	1.63683	0.086305		-0.024554	0.116374	-0.035916	0.148449	0.10725	0.088951		0.032108	0.142005	-0.090913	0.122331	-0.069358	0.184139		0.12122	0.12079	-0.127975	0.114227	-0.089702	0.147083		-0.184354	0.120973	-0.219164	0.163801	-0.144253	0.259485		-0.088773	0.116569	-0.099394	0.148506	n.a.	n.a.		-0.365579	0.108653	-0.784521	0.11662
159	1095-1112	SNGTHWFVTQRNFYEPQI	16	1.48031	0.120587	2.24452	0.063376	2.9804	0.135953		0.049037	0.295914	-0.084761	0.1772	-0.343942	0.142232		0.116099	0.151644	0.160533	0.180724	-0.297504	0.16169		0.133634	0.129049	-0.011766	0.128528	-0.104705	0.148421		-0.038206	0.216489	-0.546272	0.077248	-0.130972	0.432981		-0.05011	0.300362	-0.983991	0.074868	-0.929507	0.141676		-0.385226	0.12459	-0.318543	0.160413
160	1101-1112	FVTQRNFYEPQI	10	1.87305	0.063072	2.27374	0.042804	2.50063	0.049856		-0.023144	0.094337	-0.01317	0.080174	0.147028	0.054141		-0.011337	0.066706	-0.23226	0.099535	-0.145425	0.054954		-0.028276	0.097425	-0.036064	0.050242	-0.126809	0.089021		-0.32221	0.120876	0.062544	0.19679	-0.067793	0.064439		-0.273014	0.10832	-0.440302	0.145298	-0.611407	0.052983		-0.198367	0.236071	-0.143379	0.125534
161	1101-1115	FVTQRNFYEPQIITT	13	1.97504	0.125316	3.00086	0.131643	3.93016	0.163551		0.116423	0.190092	0.048443	0.231587	0.066954	0.216372		0.184295	0.155092	-0.111627	0.182409	-0.221833	0.201694		0.161249	0.183887	-0.030044	0.176907	-0.054478	0.228198		-0.072442	0.152551	-0.298222	0.167548	-0.234243	0.209966		-0.18158	0.141062	-0.311303	0.163587	-0.483614	0.176175		-0.050033	0.1396	-0.246986	0.15798
162	1101-1118	FVTQRNFYEPQIITTDNT	16	2.24627	0.09834	3.42212	0.071519	4.51358	0.109834		0.125928	0.16299	-0.036719	0.204406	0.050605	0.135665		0.294185	0.10309	-0.04516	0.120635	-0.049133	0.120898		0.175181	0.142575	-0.039657	0.134966	-0.107741	0.149131		-0.007744	0.132117	-0.40699	0.091709	-0.316342	0.215645		-0.258034	0.103651	-0.685923	0.091919	-0.997757	0.109981		-0.003402	0.103397	-0.366895	0.153168
163	1107-1115	FYEPQIITT	7	1.27694	0.016261	2.01185	0.024825	2.77121	0.052089		0.104827	0.081132	0.012956	0.065211	0.022601	0.054979		0.040343	0.038167	-0.014385	0.055374	-0.054108	0.075439		0.063308	0.064674	-0.04571	0.080932	-0.043533	0.097133		-0.009144	0.042301	-0.152449	0.041669	-0.1716	0.082545		-0.014942	0.057372	-0.025011	0.03066	-0.185125	0.056114		-0.001776	0.092282	-0.047147	0.027561
164	1107-1119	FYEPQIITTDNTF	11	1.17565	0.103274	1.74917	0.084482	2.52721	0.117878		-0.087618	0.148739	-0.021664	0.114421	-0.160718	0.184388		-0.006272	0.10881	-0.089389	0.087372	-0.134635	0.118701		0.048616	0.150086	-0.047287	0.143323	-0.186521	0.162563		-0.216275	0.11951	-0.357578	0.112762	-0.482475	0.135171		1.56503	0.214238	1.45819	0.131921	0.970785	0.183237		-0.202572	0.140808	-0.334403	0.10159
165	1116-1125	DNTFVSGNCD	9	1.82702	0.22384	2.41659	0.068714	2.807	0.070567		0.439503	0.3108	0.071642	0.124715	-0.209942	0.080329		0.356402	0.245067	0.078501	0.169012	-0.039312	0.082154		0.461937	0.227065	0.165935	0.1061	-0.111676	0.415374		-0.079421	0.331057	-0.261827	0.236857	-0.292177	0.325092		-1.04632	0.224099	-1.31822	0.070265	-1.1193	0.073307		0.038149	0.261868	-0.126148	0.177153
166	1119-1125	FVSGNCD	6	1.10587	0.114459	1.33036	0.086415	1.61219	0.05771		0.30768	0.169479	0.133526	0.125005	-0.010079	0.161144		0.156348	0.133447	0.040998	0.126372	-0.114135	0.076781		0.134246	0.132027	0.071084	0.094867	-0.127627	0.214307		-0.129176	0.170379	-0.16571	0.132247	-0.296664	0.105155		-0.223031	0.251272	-0.203743	0.087903	-0.28372	0.112255		-0.109225	0.13034	-0.170201	0.101614
167	1120-1147	VSGNCDVVIGIVNNTVYDPLQPELDSFK	25	5.33008	0.192226	7.31934	0.240921	7.84383	0.354689		0.122554	0.323369	-0.334628	0.284242	-0.006776	0.482281		1.23581	0.263154	0.329173	0.314292	0.470427	0.473826		1.23138	0.252338	0.338938	0.291147	0.839032	0.390548		0.591896	0.582816	0.052854	0.264008	-0.268787	0.658696		1.19793	0.26058	0.487271	0.292106	0.810063	0.390548		1.56369	0.262615	0.619827	0.300098
168	1165-1172	GDISGINA	7	2.35651	0.244639	2.6148	0.187022	2.81919	0.057026		0.071386	0.245685	-0.162167	0.187547	-0.783422	0.138026		0.689371	0.288119	0.823094	0.203896	-0.50905	0.277181		n.a.	n.a.	0.631825	0.187352	0.463974	0.058274		n.a.	n.a.	n.a.	n.a.	n.a.	n.a.		-0.035507	0.524022	-0.115736	0.273669	0.158945	0.097786		n.a.	n.a.	n.a.	n.a.
169	1173-1184	SVVNIQKEIDRL	11	3.46752	0.069516	4.92679	0.114392	5.65339	0.05138		0.007826	0.135939	0.05428	0.132763	0.180963	0.152119		-0.251351	0.104019	-0.070826	0.127957	-0.022561	0.060015		0.013888	0.177141	-0.10389	0.121497	-0.13356	0.249613		n.a.	n.a.	n.a.	n.a.	n.a.	n.a.		-0.326415	0.132276	-0.491312	0.132922	-0.099186	0.060463		-0.392485	0.103279	-0.274458	0.133591
170	1175-1184	VNIQKEIDRL	9	2.58198	0.244777	4.09939	0.090744	4.74217	0.129903		0.117681	0.276572	-0.127386	0.193531	-0.148401	0.154497		0.012135	0.281137	-0.193175	0.162734	-0.218355	0.145882		0.113975	0.293278	-0.175976	0.121697	-0.258725	0.171127		-0.468464	0.267665	-0.562788	0.122737	-0.211401	0.171828		-0.398521	0.313361	-0.545127	0.153067	-0.316449	0.339164		-0.075461	0.286654	-0.280629	0.196546
171	1199-1220	QELGKYEQGSGYIPEAPRDGQA	19	6.21529	0.511375	7.69777	0.033732	8.44688	0.153077		0.366771	0.566328	-0.148594	0.186539	-0.523819	0.157692		0.605421	0.544852	0.040594	0.180621	-0.536319	0.164392		0.395429	0.545849	0.100848	0.249198	-0.335988	0.271775		0.059618	0.536435	-0.266543	0.11599	-0.787276	0.302427		-0.169194	0.523168	-0.837104	0.169699	-1.12896	0.224517		0.17554	0.539237	-0.313097	0.142603
172	1221-1228	YVRKDGEW	7	0.854325	0.018593	1.11701	0.031292	1.16518	0.018419		0.341008	0.046619	0.046098	0.071005	0.004396	0.078682		0.077978	0.027428	0.019353	0.072114	-0.074431	0.024634		0.310086	0.038451	0.06235	0.035375	0.059192	0.081745		-0.068563	0.023561	n.a.	n.a.	n.a.	n.a.		0.319793	0.020435	0.107769	0.033378	0.091204	0.020018		-0.095597	0.069255	-0.273525	0.050538
173	1221-1230	YVRKDGEWVL	9	1.40897	0.049016	1.60844	0.030429	1.55394	0.033889		-0.124231	0.080041	-0.190307	0.057626	-0.119067	0.048458		-0.057939	0.060417	-0.15029	0.064936	-0.126006	0.051588		-0.056792	0.064342	-0.125267	0.068962	-0.035802	0.089165		-0.121349	0.071941	-0.143798	0.034013	-0.045394	0.058166		-0.038271	0.059377	-0.255836	0.090774	-0.065214	0.048509		-0.147994	0.06469	-0.061564	0.050493
174	1229-1235	VLLSTFL	6	2.44799	0.075077	2.68793	0.085869	3.00476	0.052951		0.027975	0.081733	-0.175884	0.095989	-0.077097	0.088215		0.021313	0.078626	-0.10395	0.101885	-0.156055	0.059259		0.03187	0.084791	-0.084198	0.110191	-0.172329	0.157707		0.119229	0.076533	-0.064604	0.087839	-0.000345	0.134192		-0.080754	0.133631	-0.285582	0.100091	-0.133834	0.103063		0.02752	0.132561	-0.187829	0.146288
175	1231-1238	LSTFLGRS	7	2.84257	0.263769	2.97571	0.165085	3.28717	0.026727		0.598657	0.28837	0.22245	0.175815	-0.542881	0.033418		0.442425	0.350662	0.3414	0.205822	0.079126	0.070308		0.49559	0.342425	0.432061	0.221411	0.063546	0.037805		0.182237	0.424623	0.0942	0.239057	-0.068907	0.162809		0.368866	0.264601	0.389602	0.269404	-0.094476	0.126953		0.32866	0.271945	0.323896	0.198169
176	1231-1239	LSTFLGRSL	8	3.38292	0.292786	3.57168	0.16506	3.89486	0.086833		0.115302	0.311178	-0.135661	0.237331	-0.333733	0.129697		0.154195	0.355481	-0.087729	0.266045	-0.404048	0.164862		0.074938	0.337996	0.008525	0.243364	-0.239184	0.190835		0.036381	0.410973	-0.051015	0.256376	-0.432153	0.264053		-0.052184	0.42513	-0.235118	0.294923	-0.763874	0.166829		-0.133297	0.355044	-0.306443	0.2096
177	1231-1242	LSTFLGRSLEVL	11	3.55425	0.1758	4.63582	0.187977	4.53989	0.097105		0.588136	0.209107	-0.436105	0.472053	0.051072	0.101312		0.609961	0.221041	-0.386642	0.372921	-0.12159	0.324877		0.41804	0.190093	-0.348643	0.234528	0.032768	0.425841		0.238811	0.431748	-0.779223	0.288551	-0.399431	0.523222		0.629871	0.250288	-0.45216	0.358875	-0.617055	0.202771		0.131504	0.190696	-0.591499	0.223406
178	1232-1242	STFLGRSLEVL	10	3.51481	0.133125	3.7616	0.181145	4.59445	0.088501		0.812453	0.151824	0.601588	0.30344	0.068768	0.103047		0.764401	0.202257	0.568121	0.320598	-0.142326	0.132885		0.288168	0.134611	0.507814	0.185559	-0.003125	0.350843		0.25307	0.20039	0.53086	0.2238	-0.254716	0.202854		0.617087	0.222036	0.19655	0.227187	-0.450113	0.136285		0.23611	0.145718	0.252868	0.18203
179	1258-1264	WSHPQFE	5	0.915417	0.098603	0.891553	0.087131	0.950326	0.094184		-0.102527	0.135341	-0.150412	0.133814	-0.188479	0.123488		-0.109448	0.146541	-0.115849	0.137893	-0.190408	0.128703		-0.162867	0.149995	-0.15234	0.132594	-0.168585	0.137987		-0.158549	0.131448	-0.125218	0.119692	-0.192429	0.151762		-0.339118	0.171716	-0.253957	0.122942	n.a.	n.a.		-0.206986	0.147645	-0.177733	0.12238
[truncated: 2 more columns]

## Sheet: Spike-Omicron BA2
Table: Deuterium exchange values for different pepsin-digested fragments of Spike(Omicron BA.2) variant in the presence or absence of different proteins. The values are an average of replicate measurements with standard deviation (SD) values indicated.
				Relative Uptake of peptides of Spike(O2) in apo state							Spike(O2):LSI-CoVA-014 complex minus Spike(O2)							Spike(O2):LSI-CoVA-015 complex minus Spike(O2)							Spike(O2):LSI-CoVA-016 complex minus Spike(O2)							Spike(O2):ACE2 complex minus Spike(O2)
				1 min		10 min		100 min			1 min		10 min		100 min			1 min		10 min		100 min			1 min		10 min		100 min			1 min		10 min		100 min
S.No.	Residue No.s	Sequence	MEA	Uptake (Da)	± SD	Uptake (Da)	± SD	Uptake (Da)	± SD		ΔHDX (D)	± SD	ΔHDX (D)	± SD	ΔHDX (D)	± SD		ΔHDX (D)	± SD	ΔHDX (D)	± SD	ΔHDX (D)	± SD		ΔHDX (D)	± SD	ΔHDX (D)	± SD	ΔHDX (D)	± SD		ΔHDX (D)	± SD	ΔHDX (D)	± SD	ΔHDX (D)	± SD
1	17-39	NLITRTQSYTNSFTRGVYYPDKV	21	8.20242	0.092258	9.20493	0.084471	9.39465	0.169427		0.676372	0.192353	-0.215895	0.204985	-0.267853	0.211064		0.751581	0.128413	0.25164	0.164523	-0.187286	0.216657		0.712313	0.241211	0.077594	0.110315	-0.467915	0.24237		0.902732	0.146574	0.066951	0.152173	-0.215449	0.187559
2	19-28	ITRTQSYTNS	9	2.66802	0.199571	2.85702	0.219035	3.3789	0.163907		0.453588	0.226597	0.525905	0.252504	0.068955	0.189302		0.031814	0.224531	0.438504	0.305642	-0.266614	0.231686		0.138594	0.233565	0.411725	0.243529	-0.120743	0.199001		0.106676	0.254335	0.382966	0.252821	0.022226	0.198677
3	25-54	YTNSFTRGVYYPDKVFRSSVLHSTQDLFLP	27	3.50048	0.113779	4.70427	0.112153	6.19525	0.056663		0.870734	0.197446	0.870242	0.227087	0.620662	0.08636		-0.683379	0.165881	-0.199676	0.164879	-0.936396	0.228103		-0.958258	0.155861	-1.31768	0.116534	-1.66569	0.131682		1.17677	0.165831	0.677554	0.227298	0.449122	0.156866
4	29-39	FTRGVYYPDKV	9	0.790347	0.061648	1.28057	0.154281	1.90052	0.085156		0.59371	0.071038	0.441664	0.177868	0.190863	0.097977		0.071539	0.090735	0.051394	0.174883	-0.123858	0.103465		0.060309	0.06705	-0.077367	0.166154	-0.219428	0.109928		-0.177214	0.089629	-0.367434	0.156193	-0.448504	0.113789
5	29-40	FTRGVYYPDKVF	10	0.613897	0.090525	1.35631	0.116192	2.02539	0.086004		0.788796	0.109632	0.451966	0.160894	0.218426	0.105683		-0.01635	0.097505	-0.253516	0.162393	-0.32552	0.104904		0.109992	0.092841	-0.281506	0.120323	-0.182311	0.096083		-0.10063	0.095467	-0.365759	0.123068	-0.021655	0.094222
6	29-45	FTRGVYYPDKVFRSSVL	15	1.53747	0.183254	2.59219	0.171177	3.64399	0.148936		1.34628	0.213816	0.860614	0.205043	0.195168	0.192427		0.195428	0.214082	0.079809	0.222216	-0.477728	0.21326		0.298932	0.208545	-0.146442	0.192309	-0.450137	0.186369		0.151157	0.21097	-0.323906	0.201477	-0.134108	0.176595
7	33-45	VYYPDKVFRSSVL	11	1.64127	0.073318	2.90022	0.152632	3.74741	0.136276		1.42567	0.116636	0.53503	0.244889	0.007697	0.166811		0.124773	0.114868	-0.565024	0.197831	-0.819201	0.151013		0.1979	0.101872	-0.464803	0.171327	-0.64442	0.152801		-0.041754	0.2114	-0.594491	0.183445	-0.267329	0.152564
8	36-45	PDKVFRSSVL	8	0.494157	0.050875	1.13264	0.018586	2.27423	0.287357		1.69706	0.260567	1.34624	0.337756	0.446201	0.341677		0.899741	0.197614	0.775754	0.381283	-0.003227	0.422806		0.621692	0.072696	0.476718	0.17681	-0.168018	0.350327		0.807441	0.170997	0.664303	0.264673	0.555211	0.29944
9	40-51	FRSSVLHSTQDL	11	1.36504	0.118945	1.91026	0.206856	2.19478	0.316448		0.102058	0.155315	-0.072595	0.262487	0.160564	0.341641		0.161537	0.177763	0.147367	0.297448	-0.128601	0.340302		0.070092	0.289983	-0.039525	0.248335	-0.112563	0.340251		0.109512	0.139035	-0.122368	0.284982	0.065322	0.317634
10	46-52	HSTQDLF	6	0.470153	0.066328	0.805337	0.075039	0.954865	0.062258		0.058935	0.069548	0.015973	0.077577	0.097815	0.079298		0.042616	0.069676	0.046503	0.098137	0.090962	0.062577		0.058024	0.067735	0.051157	0.076164	0.084112	0.090783		-0.012738	0.068511	-0.078679	0.076245	0.003275	0.104678
11	46-53	HSTQDLFL	7	0.420498	0.01817	0.704554	0.038272	0.921981	0.059206		0.049328	0.020104	0.040552	0.049025	0.093212	0.066956		-0.006323	0.046656	-0.055237	0.072686	0.027801	0.072787		-0.029997	0.04437	0.054172	0.049934	0.003893	0.071412		0.000803	0.025626	-0.014171	0.04537	0.028274	0.079438
12	75-96	RFDNPVLPFNDGVYFASTEKSN	19	6.39815	0.06925	7.59834	0.200207	8.24267	0.317973		-1.9824	0.123456	-2.30945	0.245769	-2.22858	0.35813		-2.1391	0.094035	-2.38957	0.222649	-2.42797	0.326841		-1.62093	0.449293	-2.05696	0.48261	-2.13542	0.541019		-1.62511	0.191536	-2.27198	0.228652	-2.49737	0.432438
13	82-88	PFNDGVY	5	0.312138	0.067422	0.435502	0.061626	0.684332	0.054979		0.025049	0.078026	0.180641	0.077908	0.057887	0.075674		0.074308	0.092621	0.215792	0.096748	0.013057	0.10855		0.007127	0.094828	0.105681	0.066383	-0.011515	0.072032		-0.052684	0.086834	-0.011871	0.080984	-0.06863	0.099778
14	88-100	YFASTEKSNIIRG	12	2.3809	0.112966	2.97732	0.1775	2.89961	0.134676		-0.122541	0.185848	-0.199064	0.189334	0.033772	0.156761		-0.170188	0.18903	-0.239316	0.222139	-0.169711	0.138241		-0.033808	0.177433	-0.161559	0.186498	-0.003893	0.179533		-0.151661	0.22803	-0.263042	0.241867	0.059064	0.174553
15	89-100	FASTEKSNIIRG	11	1.79295	0.221288	2.31824	0.152232	2.44082	0.119543		0.118604	0.247331	0.078513	0.17292	0.131035	0.131628		0.098498	0.248403	0.234884	0.173003	0.002632	0.136714		0.133379	0.238675	0.074608	0.160905	0.016822	0.131608		0.080845	0.243024	0.068263	0.173998	0.187681	0.124082
16	89-103	FASTEKSNIIRGWIF	14	1.1482	0.172093	1.61034	0.088347	1.76804	0.184035		0.10542	0.188354	0.035709	0.111966	0.052489	0.198434		0.050651	0.200161	0.219535	0.147777	-0.045323	0.220925		0.144593	0.180372	0.114912	0.090228	-0.018705	0.193795		0.098661	0.188067	0.04637	0.103395	0.078594	0.190401
17	89-107	FASTEKSNIIRGWIFGTTL	18	1.74086	0.172762	3.30306	0.119694	3.57538	0.200307		0.326801	0.204311	0.150048	0.157566	0.054609	0.246986		0.396513	0.270275	0.307046	0.219197	-0.036591	0.250721		0.474624	0.182188	0.171026	0.164156	-0.138168	0.256286		0.278353	0.242549	0.193123	0.165063	-0.009723	0.254088
18	91-100	STEKSNIIRG	9	1.50666	0.151088	1.93009	0.088138	2.04054	0.073384		0.075803	0.201524	0.085272	0.10848	0.148515	0.084295		0.150071	0.155377	0.210453	0.100806	0.058645	0.07826		0.100158	0.161818	0.11505	0.093574	0.053767	0.096614		0.081178	0.188213	0.136514	0.10003	0.141448	0.074484
19	96-103	NIIRGWIF	7	0.25796	0.053145	0.768624	0.090081	0.824505	0.105275		0.104959	0.105959	0.081856	0.120288	0.059926	0.13146		0.042088	0.070066	0.074968	0.101381	0.006722	0.133465		0.123841	0.091655	0.06137	0.111249	0.05459	0.11684		0.030725	0.069105	0.002284	0.130721	0.11159	0.135601
20	101-107	WIFGTTL	6	0.487345	0.056102	1.3383	0.062422	1.36932	0.063151		0.104289	0.067097	-0.005053	0.079098	-0.026145	0.077936		0.098234	0.084118	0.060951	0.095431	-0.051341	0.074927		0.239337	0.071402	0.020505	0.071707	-0.060239	0.079584		-0.011127	0.093012	-0.04128	0.066242	-0.039882	0.082775
21	104-114	GTTLDSKTQSL	10	0.987696	0.124299	1.67813	0.095407	2.13054	0.074905		0.432187	0.12896	0.108074	0.167939	0.055716	0.169502		0.144496	0.212776	0.324727	0.111334	0.183688	0.185618		0.19645	0.160773	0.195263	0.111823	-0.025998	0.081529		0.166109	0.124574	0.030308	0.142665	0.006432	0.1484
22	108-114	DSKTQSL	6	0.601581	0.070844	0.71637	0.046449	0.985587	0.06313		0.082599	0.075509	0.075097	0.053131	0.115579	0.074045		0.071243	0.075132	0.134806	0.072947	0.172757	0.073019		0.109472	0.073153	0.142917	0.053145	0.192222	0.073083		0.055763	0.073961	0.054078	0.049088	0.10977	0.076775
23	108-115	DSKTQSLL	7	0.516665	0.047803	0.527145	0.023916	0.664758	0.034802		-0.022372	0.057966	0.03447	0.061033	-0.07202	0.042466		-0.026022	0.057869	0.013197	0.036486	0.002602	0.042818		-0.050245	0.053929	-0.02516	0.032777	-0.094093	0.037676		0.004869	0.055381	0.055459	0.071909	-0.081469	0.055845
24	123-129	VVIKVCE	6	0.081261	0.029218	0.125786	0.032209	0.336581	0.034777		-0.030207	0.031808	0.023948	0.044007	0.151656	0.08963		0.014236	0.045064	0.028631	0.05368	0.092371	0.047369		0.005368	0.037744	0.061778	0.046359	0.151569	0.076915		-0.004399	0.044364	0.211437	0.106482	0.103704	0.076655
25	130-138	FQFCNDPFL	7	1.2314	0.167436	1.39263	0.067374	1.52371	0.082425		0.167865	0.180089	0.193349	0.073671	0.118385	0.115349		-0.131467	0.179624	0.240182	0.098983	0.077297	0.110083		0.05199	0.189024	0.201641	0.088538	0.060404	0.098564		-0.066538	0.187476	0.156598	0.069354	0.169188	0.090816
26	133-140	CNDPFLDV	6	1.4699	0.11693	1.96437	0.052284	2.04652	0.013838		0.251064	0.127945	0.083917	0.06212	0.017781	0.037784		-0.225508	0.151175	0.055188	0.101468	-0.000359	0.092994		-0.026655	0.125783	0.0852	0.055463	-0.017212	0.044861		-0.249552	0.178636	0.034474	0.062029	0.017155	0.041863
27	147-170	KSWMESEFRVYSSANNCTFEYVSQ	23	3.79524	0.155002	4.21482	0.082856	4.32751	0.050777		-0.322428	0.168297	0.184203	0.113957	1.0673	0.108778		-0.201277	0.177685	-0.011187	0.101538	-0.371799	0.075359		-0.150467	0.240858	-0.171143	0.12307	-0.393084	0.131217		-0.317336	0.29866	-0.195255	0.245487	-0.417303	0.178778
28	167-173	YVSQPFL	5	1.82585	0.106799	2.03586	0.07464	2.05594	0.050418		0.0625	0.125061	-0.006279	0.09813	-0.030835	0.081564		0.036359	0.149807	0.019626	0.115193	-0.048089	0.092154		0.105052	0.138628	-0.021905	0.083096	-0.126323	0.080496		-0.051165	0.132292	-0.047119	0.106608	-0.065825	0.100556
29	174-183	MDLEGKQGNF	9	2.09604	0.180928	2.30134	0.187795	2.43613	0.165627		0.097079	0.270356	-0.02009	0.320789	-0.129764	0.20948		0.237393	0.262883	0.263753	0.206502	-0.127118	0.202142		0.327694	0.241634	0.115539	0.19469	-0.20577	0.217892		0.128077	0.227558	-0.005805	0.206254	0.02929	0.32743
30	174-188	MDLEGKQGNFKNLRE	14	2.35923	0.201345	3.06008	0.153269	3.76083	0.082484		0.363229	0.30265	0.226705	0.273167	-0.000398	0.120581		0.496341	0.287969	0.579417	0.153525	0.064331	0.143393		0.47873	0.285538	0.478843	0.189393	0.004258	0.214091		0.814818	0.201386	0.313061	0.209291	0.157867	0.116793
31	175-188	DLEGKQGNFKNLRE	13	2.22717	0.369661	2.85157	0.356681	3.5229	0.210403		0.239133	0.436537	0.17906	0.410368	0.069712	0.282631		0.378212	0.431465	0.766201	0.396821	0.184894	0.271375		0.428665	0.414226	0.519957	0.366297	0.182138	0.247349		0.380126	0.447368	0.347308	0.408795	0.212418	0.211075
32	177-188	EGKQGNFKNLRE	11	1.64571	0.283645	2.32219	0.279062	3.09616	0.235612		0.34027	0.307938	0.279313	0.324104	0.052154	0.265756		0.352793	0.318301	0.541886	0.31536	-0.037477	0.262237		0.40015	0.298703	0.421511	0.288552	-0.020596	0.259544		0.229778	0.336676	0.239568	0.311225	-0.030065	0.287154
33	189-196	FVFKNIDG	7	1.10505	0.112636	1.413	0.082029	1.43727	0.096048		0.173437	0.12176	-0.000176	0.087325	-0.006762	0.101857		0.22465	0.127794	0.079621	0.08883	-0.007973	0.101216		0.266024	0.118705	0.027398	0.086228	-0.035431	0.101166		0.149886	0.125134	0.010181	0.088629	0.008933	0.098743
34	189-197	FVFKNIDGY	8	1.15548	0.128335	1.63081	0.08602	2.04628	0.102478		0.200812	0.130562	0.195308	0.102978	-0.039614	0.105278		0.280682	0.143618	0.279409	0.135903	-0.035322	0.124373		0.254156	0.137844	0.227632	0.089516	-0.047364	0.105581		0.149724	0.145202	0.070056	0.107236	0.00714	0.113044
35	189-198	FVFKNIDGYF	9	1.33714	0.142976	1.85988	0.106296	2.33933	0.093098		0.218694	0.156889	0.19464	0.128537	-0.023353	0.104633		0.239777	0.175142	0.295302	0.157008	-0.048537	0.112582		0.291248	0.155053	0.259916	0.110796	-0.068698	0.106569		0.150834	0.164856	0.045003	0.117741	-0.056881	0.130026
36	197-209	YFKIYSKHTPINL	11	1.10011	0.124337	1.26481	0.050359	1.36306	0.106526		0.204672	0.184144	0.093916	0.1015	0.059805	0.134339		0.199953	0.142977	0.234902	0.125881	0.003826	0.137479		0.230057	0.143618	0.142088	0.063237	-0.010416	0.123886		0.18854	0.153553	0.083718	0.074245	-0.077174	0.106643
37	198-209	FKIYSKHTPINL	10	1.19941	0.170995	1.40179	0.082426	1.46528	0.056005		0.162853	0.197531	0.053443	0.108184	0.08821	0.073889		0.173043	0.180367	0.131781	0.159267	0.027181	0.090051		0.219424	0.178043	0.106224	0.085283	0.01224	0.101976		0.156337	0.198966	0.039066	0.112655	-0.023515	0.101182
38	199-209	KIYSKHTPINL	9	0.977838	0.089241	1.11403	0.063622	1.17835	0.082248		0.09838	0.12037	0.074783	0.101026	0.071698	0.117003		0.141668	0.11911	0.164046	0.122868	0.04391	0.118826		0.155943	0.115248	0.119953	0.092013	0.04289	0.108908		0.103544	0.136896	0.039904	0.093074	0.052511	0.110736
39	208-232	NLGRDLPQGFSALEPLVDLPIGINI	21	2.39427	0.183817	3.01973	0.149414	4.1524	0.237741		0.433036	0.200614	0.553692	0.2307	0.191583	0.293208		0.476144	0.283631	0.687582	0.263771	-0.546455	0.342892		0.301918	0.193626	0.0292	0.163248	-1.0147	0.260835		-0.601129	0.209401	-0.14929	0.237912	1.02378	0.451204
40	210-220	GRDLPQGFSAL	9	2.01	0.172128	1.98788	0.153467	2.1654	0.189273		0.129799	0.237172	0.076297	0.214682	0.000185	0.209299		0.00926	0.273357	0.109131	0.179554	-0.099162	0.224629		0.03971	0.254124	0.167655	0.180483	-0.138743	0.222623		0.043305	0.2374	0.032417	0.235989	-0.10096	0.267074
41	210-225	GRDLPQGFSALEPLVD	13	1.87929	0.308359	2.61206	0.215943	3.50546	0.192215		0.3117	0.387965	0.302472	0.278998	0.249656	0.246109		0.272331	0.379416	0.296197	0.264831	0.136745	0.262462		0.268058	0.377716	0.314974	0.251404	-0.12551	0.229336		0.259357	0.354235	0.149398	0.235317	-0.004615	0.286283
42	218-225	SALEPLVD	6	0.210365	0.038513	0.980934	0.044349	1.73582	0.015277		0.093249	0.039554	0.097333	0.054168	0.159891	0.045545		0.050262	0.040552	0.098444	0.053813	0.002345	0.068778		0.094917	0.043245	0.142826	0.052731	-0.008421	0.026383		0.055195	0.0684	-0.116701	0.072833	0.019673	0.045745
43	218-226	SALEPLVDL	7	0.250946	0.044741	1.05866	0.033036	2.24517	0.066923		0.049366	0.056037	0.142748	0.062299	0.094619	0.099889		-6.8e-05	0.065969	0.302701	0.049924	-0.044211	0.079763		0.068442	0.064212	0.349181	0.055473	0.039771	0.073595		-0.023702	0.04888	-0.030445	0.066861	-0.055532	0.08674
44	239-261	LALHRSYLTPGDSSSGWTAGAAA	21	6.20543	0.207589	6.6284	0.243925	6.97418	0.008567		-0.006624	0.317739	-0.038247	0.243939	-0.094343	0.086576		0.343676	0.369542	n.a.	n.a.	0.019697	0.044352		0.249749	0.345725	0.487677	0.2807	0.178763	0.011656		0.228501	0.317342	0.226438	0.324594	-0.089563	0.071451
45	240-261	ALHRSYLTPGDSSSGWTAGAAA	20	5.83186	0.339928	6.18419	0.351424	6.32504	0.240108		0.13269	0.454209	-0.347176	0.353178	-0.104974	0.295304		0.395176	0.446524	0.384168	0.353672	0.041072	0.252647		0.30279	0.342634	0.258906	0.418683	-0.2581	0.277369		0.24201	0.40005	0.278252	0.436117	-0.181159	0.244093
46	242-261	HRSYLTPGDSSSGWTAGAAA	18	5.52979	0.197054	5.877	0.19757	6.15474	0.181273		0.27917	0.235566	0.090132	0.24403	-0.177697	0.249332		0.472439	0.235471	0.418016	0.259463	-0.037587	0.23629		0.245878	0.226445	0.154613	0.221404	-0.226002	0.197978		0.425792	0.247736	0.326761	0.228141	-0.08084	0.349318
47	262-273	YYVGYLQPRTFL	10	0.889426	0.112584	1.13164	0.049598	1.14649	0.067402		0.056075	0.123606	-0.011213	0.092	0.206897	0.074245		0.101475	0.119101	0.022795	0.087939	0.026826	0.083495		0.104883	0.118724	-0.027324	0.067028	-0.041214	0.078173		-0.000223	0.125467	-0.100469	0.063116	-0.073042	0.076087
48	263-273	YVGYLQPRTFL	9	0.696385	0.051442	0.935873	0.035696	0.854221	0.061352		0.160599	0.107038	0.163814	0.066165	0.519866	0.078029		0.179887	0.071287	0.153681	0.090054	3.4e-05	0.08142		0.240849	0.06487	-0.096277	0.046576	0.041274	0.088376		0.135434	0.081021	-0.018543	0.072122	0.078697	0.099359
49	264-273	VGYLQPRTFL	8	0.806968	0.120797	0.989618	0.085756	1.01477	0.108936		0.104994	0.124098	0.065386	0.101465	0.232029	0.141256		0.120419	0.126825	0.096614	0.096761	0.042477	0.12548		0.176026	0.12459	0.042392	0.090896	0.071524	0.123795		0.08451	0.122732	0.011095	0.094488	-0.009196	0.118606
50	273-297	LLKYNENGTITDAVDCALDPLSETK	23	8.96287	0.142309	9.69055	0.17111	9.79573	0.166192		0.236238	0.158273	-0.067434	0.195549	-0.069689	0.189313		0.629437	0.168728	0.35957	0.180482	0.121777	0.179558		0.554304	0.180534	0.106197	0.187645	-0.338358	0.219413		0.649111	0.159385	0.334934	0.214498	0.019878	0.193855
51	287-304	DCALDPLSETKCTLKSFT	16	2.48028	0.14206	3.09345	0.210794	4.00674	0.094633		-0.106617	0.159052	0.519525	0.265695	0.654495	0.101131		-0.159675	0.145028	0.334519	0.256496	-0.364722	0.229505		-0.052334	0.150491	0.109733	0.227518	-0.057059	0.154461		-0.149287	0.14879	0.049897	0.246152	0.052344	0.184484
52	288-296	CALDPLSET	7	1.04887	0.083503	1.23178	0.068321	2.02729	0.061733		0.148775	0.097532	0.135418	0.078336	-0.0557	0.06799		0.034355	0.126771	0.09772	0.07434	0.008864	0.10538		0.056156	0.089915	0.073962	0.081307	-0.064801	0.084495		-0.013852	0.089092	-0.016059	0.099948	0.042679	0.082033
53	288-298	CALDPLSETKC	9	1.20078	0.141761	1.32489	0.087796	2.05502	0.047571		0.254814	0.1582	0.437114	0.122234	0.494893	0.099864		0.049003	0.189186	0.281673	0.132507	0.177661	0.070471		0.128246	0.145247	0.277555	0.104437	0.257999	0.127548		-0.028548	0.148937	-0.094635	0.135064	-0.193652	0.213334
54	288-300	CALDPLSETKCTL	11	0.965119	0.115778	1.34653	0.093873	2.46304	0.08568		0.369351	0.1165	0.489292	0.139303	0.367217	0.094238		0.112856	0.119733	0.253274	0.139	0.127733	0.107224		0.239579	0.123829	0.168633	0.10397	0.069752	0.096821		0.049853	0.119353	-0.108705	0.098249	n.a.	n.a.
55	288-302	CALDPLSETKCTLKS	13	1.37381	0.172602	2.14249	0.118828	3.92411	0.08147		0.370774	0.176649	0.655867	0.168041	0.593533	0.111471		0.224296	0.176326	0.684813	0.168601	0.470326	0.081475		0.328551	0.177614	0.584403	0.132694	0.28123	0.138904		0.059159	0.173335	0.034505	0.137342	-0.207441	0.325901
56	301-315	KSFTVEKGIYQTSNF	14	3.99325	0.166646	4.67858	0.108575	4.8366	0.052569		-0.115854	0.208289	0.132679	0.198503	0.395619	0.069998		-0.110431	0.201624	0.061255	0.135843	-0.076751	0.07163		0.059102	0.186547	-0.089849	0.160386	-0.075469	0.153586		-0.144782	0.220058	-0.369573	0.123579	-0.112989	0.167388
57	303-310	FTVEKGIY	7	1.62242	0.122463	2.06519	0.100953	2.35892	0.075612		0.165071	0.155743	0.262445	0.124841	0.328097	0.118562		0.076083	0.15106	0.10795	0.122643	-0.092988	0.111767		0.131836	0.133011	0.001213	0.106428	-0.034533	0.11677		-0.033208	0.18314	-0.100068	0.120118	-0.104787	0.135968
58	303-314	FTVEKGIYQTSN	11	3.11288	0.108743	3.78368	0.143821	4.0685	0.24961		0.08828	0.148368	0.555235	0.180607	0.825955	0.264317		-0.054088	0.250229	0.434152	0.166194	0.352894	0.266913		0.14741	0.19274	-0.114802	0.201982	0.117434	0.261104		0.028291	0.111229	-0.023171	0.171773	n.a.	n.a.
59	303-315	FTVEKGIYQTSNF	12	3.18483	0.172592	3.8915	0.184839	4.1288	0.134377		-0.318551	0.189268	-0.070299	0.239588	-0.11351	0.160076		-0.178942	0.236701	-0.021647	0.194504	-0.308643	0.141038		-0.030734	0.185894	-0.247139	0.197952	-0.297816	0.167011		-0.258499	0.197185	-0.441516	0.216669	-0.292678	0.226404
60	304-315	TVEKGIYQTSNF	11	3.0121	0.127588	3.71186	0.098867	3.91446	0.098068		0.109545	0.142565	0.066309	0.126024	0.392451	0.180818		0.166117	0.154934	-0.036152	0.16035	-0.079024	0.10519		0.207958	0.138413	-0.127553	0.114559	-0.068918	0.132893		0.071119	0.128088	-0.042417	0.100498	n.a.	n.a.
61	307-315	KGIYQTSNF	8	1.97674	0.12408	2.19437	0.113469	2.35042	0.112486		-0.275533	0.158416	0.107828	0.114516	0.092054	0.113006		-0.072806	0.125214	0.02945	0.178426	-0.034472	0.121155		-0.118399	0.131397	-0.032004	0.124622	-0.156819	0.133657		-0.245963	0.152854	-0.220583	0.173134	-0.041354	0.135834
62	308-325	GIYQTSNFRVQPTESIVR	16	2.36843	0.072433	2.88572	0.134042	4.20728	0.255761		0.483266	0.180911	0.404912	0.244332	-0.098666	0.258899		0.385013	0.195756	-0.021047	0.223246	-1.33441	0.257591		0.278651	0.154603	-0.1427	0.151012	-1.36656	0.259458		-0.13841	0.238728	0.200164	0.363732	-0.297413	0.385146
63	315-322	FRVQPTES	6	2.35282	0.086953	2.43733	0.031428	2.38587	0.085007		-0.178997	0.122728	-0.111258	0.068434	-0.031076	0.110047		-0.34171	0.128478	-0.051436	0.038377	-0.059188	0.08691		-0.27083	0.097301	-0.028795	0.0564	-0.056628	0.09377		-0.232661	0.142217	0.018891	0.056092	-0.017783	0.109027
64	320-343	TESIVRFPNITNLCPFDEVFNATR	21	4.42538	0.218288	5.39125	0.192441	5.87692	0.226445		-0.708397	0.232248	-0.461102	0.212904	0.095567	0.23122		0.492134	0.258943	0.861055	0.229314	0.192148	0.244296		0.367166	0.222408	0.402514	0.21667	0.047469	0.232749		0.757107	0.256201	0.774052	0.274849	0.388914	0.226457
65	345-358	ASVYAWNRKRISNC	13	1.55142	0.227578	2.7168	0.335744	4.88598	0.317584		0.750626	0.261095	0.873742	0.381972	-0.209159	0.376444		0.314109	0.265971	0.232544	0.425413	-0.933064	0.44095		0.424611	0.245037	-0.18064	0.337905	-1.29572	0.336539		0.142063	0.255767	-0.414679	0.413207	-0.60815	0.397555
66	348-358	YAWNRKRISNC	10	1.07599	0.16992	1.7571	0.115593	2.70076	0.12298		0.522138	0.195337	0.057655	0.12565	-0.458751	0.145081		0.191958	0.205994	0.074328	0.188234	-0.439415	0.166813		0.259316	0.192015	-0.074526	0.13309	-0.570792	0.159666		0.16078	0.194128	-0.091522	0.212802	-0.07741	0.17536
67	366-372	YNFAPFF	5	2.02208	0.078181	2.15517	0.031767	2.1803	0.03256		0.136966	0.098203	-0.021015	0.055166	-0.052968	0.055105		0.086456	0.091413	0.028309	0.04909	-0.077491	0.052561		0.148787	0.083437	0.009485	0.036081	-0.123076	0.047279		0.100778	0.088105	-0.006951	0.049528	-0.035743	0.054098
68	366-373	YNFAPFFA	6	2.66269	0.114162	2.82814	0.013819	2.87101	0.013165		0.188761	0.133733	-0.006987	0.040502	-0.066766	0.03239		0.166969	0.123701	0.043043	0.054399	-0.090699	0.035344		0.182825	0.12085	0.000672	0.021168	-0.183128	0.039874		0.11185	0.118589	0.002525	0.045972	-0.055863	0.057847
69	373-384	AFKCYGVSPTKL	10	1.64299	0.120422	1.99724	0.070139	2.34513	0.149656		0.638517	0.168289	0.736018	0.194617	0.492583	0.155618		0.495329	0.123235	0.413569	0.077842	-0.026607	0.151445		-0.46758	0.126401	-0.652276	0.083729	-0.038896	0.168643		0.53652	0.173485	1.19355	0.100427	1.36539	0.202365
70	374-384	FKCYGVSPTKL	9	1.4006	0.109751	1.74879	0.066985	1.97282	0.06201		0.689044	0.125415	0.818537	0.126692	0.851923	0.086747		-0.563156	0.117998	0.086023	0.115314	0.240765	0.066986		-0.637316	0.123328	-0.381397	0.071181	0.281258	0.079525		1.19516	0.14879	0.802279	0.083146	1.39672	0.178966
71	389-396	FTNVYADS	7	0.473784	0.10695	1.13754	0.069953	1.75162	0.065033		0.104457	0.117758	0.116992	0.080819	-0.074921	0.086809		0.024235	0.115838	-0.077885	0.081039	-0.350406	0.085766		-0.004058	0.114682	-0.130888	0.084399	-0.405238	0.098908		-0.06627	0.108822	-0.072114	0.158686	0.210323	0.190244
72	390-396	TNVYADS	6	0.408366	0.055995	0.98014	0.064613	1.63084	0.05482		0.124437	0.057239	0.150531	0.066357	-0.100475	0.065292		-0.004274	0.059218	-0.057464	0.074921	-0.441125	0.062859		-0.000923	0.057979	-0.095182	0.068182	-0.427744	0.061135		-0.072954	0.06077	-0.100124	0.157281	0.281218	0.269871
73	390-397	TNVYADSF	7	0.359475	0.064403	0.885805	0.08769	1.73695	0.056755		0.064196	0.065193	0.065619	0.106103	-0.172113	0.0721		-0.032252	0.068885	-0.171625	0.09677	-0.788588	0.06661		0.014203	0.06704	-0.138775	0.088807	-0.773915	0.086192		-0.222672	0.07199	-0.247016	0.12994	-0.128014	0.278508
74	397-403	FVIRGNE	6	0.307894	0.074404	0.991102	0.113077	1.94267	0.068459		0.2607	0.082055	0.306327	0.117503	-0.032113	0.076054		-0.010468	0.07579	-0.31662	0.120898	-0.830341	0.085504		0.068104	0.076754	-0.378812	0.116198	-0.912312	0.070845		-0.029176	0.075785	-0.502387	0.143143	-0.473195	0.212382
75	397-405	FVIRGNEVS	8	0.993215	0.108357	1.84846	0.13294	3.0776	0.077632		0.193801	0.157854	0.608172	0.142991	0.032308	0.180267		0.01096	0.132346	-0.213847	0.161442	-0.764255	0.108107		-0.006067	0.131086	-0.467523	0.182939	-0.961307	0.16506		-0.099428	0.147098	-0.568218	0.150108	-0.614106	0.144457
76	397-417	FVIRGNEVSQIAPGQTGNIAD	19	2.60252	0.377689	4.21748	0.144011	7.50843	0.254242		1.12879	0.394261	1.85021	0.342078	-0.109707	0.332497		0.280432	0.407629	0.451284	0.378069	-1.50215	0.316224		0.352954	0.394713	-0.165741	0.168182	-1.91677	0.288634		0.057887	0.395983	-0.613843	0.247191	-0.88341	0.342339
77	398-417	VIRGNEVSQIAPGQTGNIAD	18	2.73781	0.200341	4.58739	0.23356	7.06967	0.147815		1.00508	0.215292	1.17829	0.28855	-0.330384	0.217232		0.25767	0.263432	0.174967	0.280268	-0.992718	0.195752		0.344947	0.232875	-0.371829	0.261282	-1.44093	0.204597		-0.023264	0.224684	-0.722567	0.252764	-0.888614	0.258203
78	404-417	VSQIAPGQTGNIAD	12	2.0132	0.106867	3.33619	0.114463	4.7351	0.05991		0.579247	0.113292	0.54913	0.163676	-0.015581	0.20368		0.319073	0.170049	-0.100279	0.184628	-0.710974	0.07458		0.28447	0.154012	-0.360684	0.161363	-1.0104	0.175355		0.034612	0.18372	-0.675498	0.233966	-0.513415	0.298348
79	418-428	YNYKLPDDFTG	9	0.694055	0.171425	1.00005	0.216295	1.80857	0.233646		0.415549	0.212295	0.761759	0.259497	0.522462	0.253115		0.1014	0.192674	0.271534	0.311204	-0.071203	0.278274		0.058646	0.181774	0.115886	0.263109	-0.282768	0.262542		0.048731	0.284047	-0.178454	0.282347	0.615541	0.292199
80	420-428	YKLPDDFTG	7	0.664534	0.137615	0.780546	0.093591	1.1786	0.16642		0.329219	0.154676	0.389649	0.097084	0.207099	0.16813		0.012312	0.146072	0.150506	0.112498	-0.078168	0.177471		0.006622	0.138523	0.050848	0.098478	-0.170434	0.172397		-0.022265	0.142236	-0.054166	0.104254	0.224647	0.178456
81	429-446	CVIAWNSNKLDSKVGGNY	17	3.51088	0.049308	3.61774	0.120433	3.98953	0.243472		0.113088	0.09636	0.300928	0.209144	0.695014	0.294152		0.484846	0.102084	n.a.	n.a.	-0.000765	0.257172		0.184811	0.217368	0.007775	0.127625	-0.418362	0.312254		-0.328374	0.112306	0.617905	0.131289	1.38876	0.336372
82	439-449	DSKVGGNYNYL	10	3.04287	0.163764	3.40665	0.126272	3.50969	0.089611		0.345789	0.192819	0.110752	0.166168	0.013528	0.116842		0.098728	0.209466	0.354564	0.145997	0.035688	0.148144		0.09975	0.231901	0.195943	0.144919	-0.104059	0.13379		0.197413	0.227772	0.301119	0.210811	0.194827	0.139162
83	450-464	YRLFRKSNLKPFERD	13	1.16804	0.211836	2.20249	0.391107	3.0268	0.114051		0.618194	0.284857	0.883931	0.44937	0.355924	0.216261		0.185194	0.2575	0.765146	0.452767	0.290219	0.234556		0.221162	0.23785	0.417717	0.392712	0.229371	0.177745		-0.098007	0.234102	-0.18434	0.394666	0.336588	0.182213
84	450-467	YRLFRKSNLKPFERDIST	16	2.56404	0.38799	4.25165	0.162219	5.01704	0.085203		1.03282	0.43337	0.824863	0.17742	0.427264	0.133068		0.456749	0.452435	0.737004	0.224558	0.274525	0.19678		0.386847	0.41573	0.135907	0.185164	0.09909	0.171359		0.170344	0.413956	-0.44353	0.199236	0.341167	0.156273
85	450-468	YRLFRKSNLKPFERDISTE	17	2.73466	0.144831	4.02976	0.112584	5.4168	0.088094		1.40383	0.388485	1.72947	0.284432	1.05936	0.240196		0.610107	0.239654	1.62903	0.227478	0.502555	0.142632		0.668633	0.181508	0.913606	0.184972	0.303108	0.138436		0.35471	0.192034	0.115062	0.19568	0.566882	0.223198
86	453-464	FRKSNLKPFERD	10	0.814754	0.136464	1.7562	0.136428	2.47214	0.08566		0.501244	0.154353	0.57297	0.19265	0.210294	0.137364		0.01842	0.154285	0.37018	0.200721	0.08049	0.122297		0.087222	0.155803	0.153835	0.145806	-0.03455	0.121003		-0.083598	0.141998	-0.367041	0.168141	-0.060976	0.165063
87	453-467	FRKSNLKPFERDIST	13	2.2252	0.234789	3.44169	0.2545	4.24925	0.136567		0.664768	0.254516	0.565778	0.313493	0.035274	0.183514		0.155785	0.276188	n.a.	n.a.	-0.062604	0.179178		0.086023	0.237123	0.095851	0.267388	-0.20023	0.159955		-0.115985	0.25282	-0.476509	0.30832	-0.168379	0.176252
88	453-468	FRKSNLKPFERDISTE	14	2.54638	0.197322	3.90867	0.103519	4.85422	0.098388		1.00626	0.245185	0.73697	0.208873	0.281842	0.136213		0.442106	0.205209	0.558008	0.266371	0.076719	0.174178		0.506047	0.270563	0.28864	0.150405	-0.210362	0.200366		0.305972	0.219876	-0.254949	0.149294	-0.167208	0.176336
89	468-479	EIYQAGNKPCNG	10	2.94227	0.251576	3.03595	0.171127	3.11851	0.1354		0.288562	0.300201	0.20556	0.210254	0.012211	0.148118		0.249314	0.303308	0.402127	0.225136	0.130469	0.170996		-0.016115	0.262384	0.091501	0.186742	-0.062074	0.165736		1.39946	0.269271	1.84374	0.198593	1.94396	0.160221
90	468-483	EIYQAGNKPCNGVAGF	14	3.98067	0.108924	4.26807	0.124204	4.30657	0.049539		0.29348	0.144734	-0.012725	0.124777	-0.03468	0.055759		0.095156	0.10899	0.139255	0.124262	-0.090441	0.051903		0.493401	0.110051	0.116538	0.130521	0.049038	0.067432		0.071547	0.132796	0.310931	0.143357	0.348077	0.136906
91	469-483	IYQAGNKPCNGVAGF	13	3.88555	0.140746	4.19857	0.195606	4.20279	0.14271		0.234736	0.148701	-0.140024	0.197636	-0.117041	0.144662		0.313352	0.183378	0.27785	0.267528	-0.059459	0.175392		0.349758	0.142729	0.070248	0.212031	-0.215666	0.146074		0.473211	0.195867	0.36868	0.198862	0.244343	0.15039
92	484-491	NCYFPLRS	6	1.36906	0.10386	2.00812	0.073902	2.32758	0.077991		0.472418	0.146534	0.394395	0.122005	0.216277	0.105196		0.054837	0.131371	0.054461	0.153198	0.0332	0.099395		0.079173	0.128625	-0.078049	0.086121	-0.134308	0.107693		-0.233086	0.105045	-0.25643	0.123306	0.137554	0.092709
93	484-493	NCYFPLRSYG	8	1.66884	0.15137	2.65044	0.17425	3.02763	0.21952		0.616468	0.20178	0.480778	0.179676	0.165754	0.255378		0.095524	0.2008	-0.001329	0.197368	-0.087142	0.270707		0.076385	0.176167	-0.094776	0.196507	-0.202234	0.237705		-0.111301	0.162732	-0.217161	0.208486	0.122472	0.23445
94	488-507	PLRSYGFRPTYGVGHQPYRV	16	2.42021	0.234037	2.6633	0.088445	3.8257	0.205181		0.876751	0.275598	1.38478	0.219512	0.970019	0.239422		0.357997	0.332955	1.25588	0.229043	-0.141205	0.305069		0.873693	0.262578	0.660926	0.171173	-0.101023	0.249208		-0.28034	0.238349	0.437516	0.099294	0.885229	0.354672
95	488-509	PLRSYGFRPTYGVGHQPYRVVV	18	2.46751	0.380789	2.8796	0.337909	3.99425	0.42736		0.619449	0.390373	0.910044	0.356865	0.488158	0.443213		0.145318	0.404582	0.390569	0.35758	-0.524446	0.448639		0.43302	0.426431	0.24477	0.345523	-0.776816	0.451002		-0.66688	0.391335	0.010209	0.366952	1.128	0.44318
96	488-510	PLRSYGFRPTYGVGHQPYRVVVL	19	2.29911	0.26865	2.71802	0.289974	3.88385	0.329179		0.633083	0.372457	0.73452	0.358005	0.397413	0.352264		0.547424	0.398329	0.764014	0.359406	-0.662318	0.393113		0.449905	0.314478	0.373342	0.29881	-0.908558	0.34149		-0.557862	0.309456	0.230616	0.405361	0.680033	0.515437
97	492-507	YGFRPTYGVGHQPYRV	13	2.10684	0.395345	2.35566	0.25583	3.16863	0.21		0.36216	0.469833	0.514905	0.308757	0.364072	0.220729		0.231232	0.410914	n.a.	n.a.	-0.529526	0.234303		0.179387	0.396129	0.030083	0.255843	-0.747128	0.221949		-0.51692	0.402385	0.069758	0.298579	0.238071	0.353058
98	492-509	YGFRPTYGVGHQPYRVVV	15	2.41349	0.139723	2.6446	0.232437	3.37209	0.172235		-0.103241	0.210188	-0.041712	0.246877	0.123059	0.249557		-0.005842	0.206214	0.184514	0.304413	-0.778695	0.267769		0.047574	0.168285	-0.068159	0.261547	-0.842196	0.222235		-0.743682	0.158288	-0.190143	0.30275	0.296724	0.347911
99	494-507	FRPTYGVGHQPYRV	11	1.59077	0.204012	1.75191	0.093459	2.7682	0.166347		0.093784	0.24415	0.261001	0.156335	0.061333	0.307514		0.136759	0.304142	0.246451	0.174198	-0.638047	0.223639		0.193682	0.222073	0.032323	0.176226	-0.702919	0.247187		-0.092005	0.204113	0.15078	0.109339	-0.278933	0.416175
100	494-509	FRPTYGVGHQPYRVVV	13	1.67115	0.279587	1.91061	0.181917	2.91778	0.287866		0.248951	0.338655	0.429636	0.199236	0.123601	0.301471		0.179318	0.298345	0.087867	0.231413	-0.924619	0.309632		0.21493	0.297046	0.011922	0.195053	-1.04373	0.294937		-0.264105	0.287816	0.139965	0.227431	-0.007196	0.422222
101	494-510	FRPTYGVGHQPYRVVVL	14	1.61612	0.19541	2.05934	0.28279	2.94115	0.109908		0.291727	0.196758	0.31931	0.300361	0.193662	0.155247		0.254576	0.245757	0.01681	0.296009	-0.851742	0.181517		0.276953	0.261359	-0.048144	0.290818	-1.01808	0.12102		-0.088448	0.207815	0.106096	0.328205	0.292564	0.413898
102	511-530	SFELLHAPATVCGPKKSTNL	17	4.01377	0.215138	4.29115	0.370837	4.34899	0.26171		-0.20919	0.252942	-0.13961	0.380387	0.035055	0.288711		0.383449	0.278461	0.400314	0.433217	-0.005305	0.264495		-0.289994	0.215396	-0.227423	0.405857	-0.640249	0.262863		0.232065	0.289673	0.266073	0.467024	0.158357	0.32507
103	513-529	ELLHAPATVCGPKKSTN	14	3.08803	0.100077	3.58844	0.227351	3.80246	0.126714		-0.123695	0.210127	-0.182773	0.310677	-0.097613	0.161598		0.670219	0.164694	0.506361	0.233151	0.084194	0.164562		0.651552	0.119676	0.338306	0.231569	-0.04403	0.143426		0.584193	0.121234	0.43531	0.362532	0.248082	0.15693
104	513-530	ELLHAPATVCGPKKSTNL	15	3.05288	0.195937	3.3424	0.138732	3.70216	0.136494		-0.214198	0.254653	-0.107762	0.201613	-0.185103	0.171846		0.398993	0.231624	0.549599	0.148764	-0.088884	0.166676		0.482585	0.255763	0.309786	0.159327	-0.233019	0.169016		0.324427	0.217632	0.260893	0.205952	0.045779	0.176569
105	513-538	ELLHAPATVCGPKKSTNLVKNKCVNF	23	3.15514	0.433443	3.52536	0.231426	4.32077	0.272996		-0.098717	0.433444	0.469808	0.269427	0.356468	0.34825		0.637506	0.516634	n.a.	n.a.	n.a.	n.a.		0.780102	0.487202	1.15289	0.231453	-0.111412	0.273019		0.325854	0.433464	0.677304	0.475896	0.568802	0.356621
106	531-538	VKNKCVNF	7	0.344051	0.063494	0.389306	0.060665	0.524753	0.077856		0.118788	0.067336	0.133649	0.068851	0.200669	0.081		0.090924	0.065915	0.260046	0.076241	0.148923	0.088317		0.135149	0.065257	0.225387	0.065765	0.23069	0.089542		0.061576	0.065646	0.1024	0.067443	0.225718	0.084754
107	539-549	NFNGLTGTGVL	10	0.78529	0.116831	1.25924	0.106999	1.63052	0.116924		0.016064	0.120257	-0.163697	0.115455	-0.147507	0.119901		0.585802	0.135287	0.531368	0.165028	0.07863	0.128813		0.628224	0.122745	0.410219	0.115441	0.136821	0.130019		0.338204	0.132961	0.316944	0.120274	0.243759	0.121939
108	539-565	NFNGLTGTGVLTESNKKFLPFQQFGRD	25	3.25334	0.15388	4.94716	0.112943	5.51638	0.103159		-0.142291	0.22416	-1.00444	0.121341	-0.373231	0.138836		0.553212	0.297423	0.262767	0.205383	-0.071866	0.202016		0.657917	0.204381	0.03009	0.115081	-0.505432	0.217016		0.16727	0.216555	0.058889	0.240601	0.37026	0.242255
109	541-549	NGLTGTGVL	8	0.339928	0.041915	0.686493	0.043867	0.952366	0.054591		0.163854	0.049396	0.044014	0.046651	0.020605	0.077546		0.597367	0.049043	0.552487	0.049016	0.267336	0.059398		0.585962	0.052865	0.446053	0.065404	0.29545	0.083747		0.41618	0.05703	0.342453	0.051343	0.432951	0.0602
110	550-562	TESNKKFLPFQQF	11	2.61715	0.198311	3.74093	0.093137	3.81917	0.067145		-0.285817	0.222034	-0.86884	0.09669	-0.25197	0.083673		-0.136866	0.233376	-0.418275	0.166666	-0.23402	0.125648		0.031903	0.209197	-0.435968	0.107133	-0.267904	0.085846		-0.23256	0.229639	-0.571871	0.213713	-0.085281	0.165022
111	550-565	TESNKKFLPFQQFGRD	14	2.51637	0.104735	3.93384	0.12931	4.11069	0.063645		-0.26511	0.134098	-0.954254	0.130009	-0.275214	0.082506		-0.026892	0.165223	-0.158236	0.207536	-0.198131	0.124613		0.082472	0.148929	-0.322454	0.143399	-0.244255	0.098039		-0.263579	0.133823	-0.613532	0.237229	-0.097272	0.128928
112	566-572	IADTTDA	6	0.806192	0.098512	1.21829	0.094746	1.36175	0.089299		0.291814	0.111616	0.011168	0.106103	-0.045112	0.098187		0.200519	0.115221	0.063434	0.100275	-0.138128	0.098864		0.252646	0.104967	0.034008	0.101737	-0.095873	0.100109		1.34908	0.185697	0.992819	0.104519	1.06571	0.105216
113	566-578	IADTTDAVRDPQT	11	1.3166	0.145096	2.37559	0.151933	2.89956	0.077391		0.238636	0.149746	0.12543	0.181684	-0.044015	0.102215		0.106375	0.18141	0.175693	0.200667	-0.236668	0.101912		0.279277	0.161867	0.127668	0.175004	0.122776	0.104748		0.053955	0.151291	-0.003837	0.179976	0.24387	0.124637
114	566-579	IADTTDAVRDPQTL	12	1.63376	0.147912	2.68535	0.125407	3.13452	0.119958		0.018788	0.160503	-0.03855	0.133637	-0.102662	0.126802		-0.322466	0.168672	0.058295	0.180742	-0.304498	0.148006		-0.147111	0.155329	-0.026203	0.129342	-0.221733	0.1395		-0.423874	0.162712	-0.112552	0.15898	0.112595	0.149159
115	566-580	IADTTDAVRDPQTLE	13	1.86737	0.127401	3.22151	0.102309	3.86928	0.13348		n.a.	n.a.	-0.02452	0.111827	-0.256588	0.136309		-0.196182	0.149091	0.180666	0.103756	-0.33588	0.164415		-0.032043	0.130582	0.034284	0.113061	-0.183189	0.143603		-0.319938	0.147945	-0.055104	0.137231	0.158386	0.159787
116	572-579	AVRDPQTL	6	1.03926	0.068617	1.98719	0.026136	2.21282	0.022934		-0.055753	0.073895	-0.02813	0.035135	-0.105173	0.033057		-0.301104	0.088384	-0.072569	0.054968	-0.154572	0.049968		-0.234598	0.082438	-0.093027	0.031771	-0.154656	0.042873		-0.418799	0.084542	-0.189775	0.044399	-0.01498	0.047744
117	573-579	VRDPQTL	5	1.05734	0.084733	1.96649	0.039244	1.98035	0.017146		-0.097261	0.086981	-0.066806	0.041371	0.003545	0.049473		-0.337536	0.097607	-0.064699	0.077496	-0.012111	0.045127		-0.284302	0.089996	-0.115526	0.040439	0.036238	0.089016		-0.401441	0.096856	-0.148719	0.054001	0.006434	0.036147
118	573-580	VRDPQTLE	6	1.16666	0.086567	2.20142	0.023094	2.38765	0.0638		-0.404568	0.088681	-0.029986	0.098996	0.035327	0.073513		-0.439293	0.097318	-0.054324	0.084401	-0.042958	0.081025		-0.320743	0.094151	-0.044012	0.058912	0.000708	0.080424		-0.490628	0.0895	-0.151948	0.046539	-0.043835	0.085262
119	581-589	ILDITPCSF	7	0.925563	0.123977	0.978572	0.075698	1.01146	0.067255		0.054707	0.13139	0.009296	0.094847	0.051786	0.070725		-0.006567	0.128903	0.114223	0.088447	-0.01039	0.074542		0.050805	0.127761	0.031317	0.079988	-0.005909	0.073275		-0.009254	0.133994	0.001578	0.096837	0.05584	0.076866
120	581-593	ILDITPCSFGGVS	11	1.74202	0.256778	1.93035	0.137461	2.02648	0.188457		0.326928	0.267857	0.226439	0.172822	0.374408	0.214223		-0.200974	0.271755	0.255863	0.193271	0.05528	0.213195		-0.115706	0.259332	0.19348	0.171014	0.086173	0.196017		-0.173597	0.269326	0.106263	0.175942	0.177166	0.209758
121	582-589	LDITPCSF	6	1.14248	0.15093	1.20813	0.123689	1.21381	0.059591		0.061358	0.156924	0.010995	0.129753	0.05345	0.064076		0.11121	0.158275	0.117266	0.140541	-0.031773	0.083212		0.042677	0.158422	0.011278	0.128823	-0.035298	0.080084		0.159939	0.155307	0.158409	0.180082	0.263815	0.083379
122	583-589	DITPCSF	5	0.96723	0.112753	0.985982	0.053106	1.03408	0.055266		0.043705	0.143477	0.000303	0.062165	0.005534	0.061587		-0.032155	0.155753	0.052949	0.097239	-0.052726	0.078454		0.045088	0.116239	0.042184	0.056646	-0.064958	0.065556		-0.008867	0.125976	-0.010775	0.061835	0.011836	0.079617
123	583-593	DITPCSFGGVS	9	1.87274	0.245428	2.12449	0.148263	2.18507	0.125427		0.154353	0.295958	0.152237	0.168934	0.259037	0.14152		-0.229241	0.259674	0.081762	0.205734	-0.0094	0.140144		-0.104355	0.252636	0.038426	0.152139	-0.002462	0.135489		-0.262476	0.260614	0.018958	0.160951	0.012305	0.155764
124	601-627	TSNQVAVLYQGVNCTEVPVAIHADQLT	25	8.43451	0.078635	9.34939	0.127413	9.39059	0.155961		0.553063	0.155409	-0.208645	0.152956	0.001	0.191774		0.908696	0.137126	0.544476	0.214974	0.264382	0.157655		0.647865	0.089335	0.277499	0.15255	-0.132461	0.167885		1.08234	0.178154	0.561113	0.183358	0.309782	0.215711
125	602-618	SNQVAVLYQGVNCTEVP	15	1.46668	0.178155	2.55653	0.107062	5.07651	0.052527		0.478074	0.179692	0.658238	0.153228	0.347808	0.12835		0.438277	0.190984	0.787149	0.129677	0.438218	0.119993		0.637403	0.183129	0.757709	0.158126	0.264105	0.319524		0.254298	0.179423	0.116293	0.145546	0.010498	0.177546
126	624-630	DQLTPTW	5	2.27935	0.053359	2.41324	0.038093	2.41013	0.022261		-0.026192	0.076974	-0.090097	0.08234	-0.098065	0.039695		0.057305	0.068399	0.00037	0.0964	-0.111093	0.029012		0.042514	0.071589	-0.102734	0.040787	-0.201848	0.052837		0.043209	0.070223	-0.040001	0.050281	0.005873	0.055812
127	624-640	DQLTPTWRVYSTGSNVF	15	6.39147	0.153753	7.19016	0.087458	7.34451	0.149558		0.166286	0.231791	-0.105869	0.123852	-0.10513	0.175941		0.31724	0.165918	-0.050371	0.169186	-0.144209	0.240769		0.314336	0.221002	-0.060205	0.185022	-0.321162	0.202678		0.179117	0.175231	0.028451	0.139333	-0.068942	0.193241
128	631-639	RVYSTGSNV	8	2.59452	0.160801	2.73755	0.090775	2.8788	0.088603		0.199373	0.18561	0.10164	0.110403	-0.121887	0.106717		0.25741	0.180085	0.139729	0.104108	-0.085156	0.089822		0.330993	0.162816	0.159716	0.097205	-0.138307	0.092646		0.036524	0.177822	-0.033933	0.114765	-0.131804	0.115339
129	631-640	RVYSTGSNVF	9	2.47812	0.218832	2.97092	0.101433	3.05091	0.092987		0.136735	0.218839	-0.102083	0.119901	-0.217426	0.093448		-0.058377	0.233612	0.059004	0.140953	-0.237444	0.102129		-0.004668	0.226839	-0.095511	0.106613	-0.329867	0.10881		-0.156093	0.24342	-0.13196	0.126501	-0.254403	0.128682
130	639-647	VFQTRAGCL	8	1.64849	0.12767	1.89364	0.139076	2.18953	0.155268		0.192378	0.138829	0.267794	0.172838	0.302176	0.167442		-0.1145	0.157376	0.286131	0.216209	-0.233432	0.178156		0.005605	0.146446	0.070105	0.139458	-0.194957	0.16795		-0.140945	0.154484	-0.014497	0.140155	-0.198668	0.178368
131	640-647	FQTRAGCL	7	1.30198	0.140553	1.58464	0.07903	1.782	0.153813		0.047211	0.160489	-0.082238	0.111332	-0.242273	0.171058		0.005689	0.142861	0.061149	0.09428	-0.301118	0.234672		0.090534	0.213478	0.014022	0.115053	-0.211609	0.196401		-0.121591	0.144832	-0.014196	0.10359	-0.261637	0.174337
132	659-668	CDIPIGAGIC	8	0.43862	0.06786	0.724187	0.067633	1.01551	0.055203		0.722473	0.075595	1.03072	0.216872	1.32012	0.067845		0.354272	0.076146	0.403684	0.087699	0.358675	0.063576		0.381284	0.068643	0.330816	0.068866	0.328175	0.061464		0.117607	0.071333	0.154806	0.07354	0.088161	0.090849
133	659-669	CDIPIGAGICA	9	0.576718	0.194367	0.901321	0.080721	1.20876	0.082806		1.05422	0.246925	1.24644	0.193092	1.46895	0.129601		0.476741	0.210354	0.631569	0.127307	0.680458	0.086083		0.507545	0.194915	0.44153	0.096184	0.459553	0.085884		0.197036	0.19826	0.162999	0.087695	0.134445	0.095684
134	659-670	CDIPIGAGICAS	10	0.761699	0.134279	1.07642	0.100705	1.58249	0.074601		1.13963	0.159092	1.77841	0.304842	2.23457	0.135669		0.515441	0.144542	0.676997	0.11751	0.551782	0.095298		0.560533	0.136669	0.620537	0.102767	0.531168	0.089755		0.170085	0.138948	0.250255	0.11095	0.135164	0.113714
135	661-668	IPIGAGIC	6	0.489904	0.072413	0.711056	0.077067	1.01944	0.060568		0.713062	0.080674	0.992587	0.160124	1.10797	0.071275		0.321202	0.0859	0.462805	0.104163	0.259737	0.069523		0.375588	0.073004	0.389912	0.077804	0.256925	0.066008		0.081126	0.087591	0.122348	0.09404	0.040808	0.077989
136	661-670	IPIGAGICAS	8	0.743747	0.094281	1.11621	0.090644	1.60974	0.099436		1.14048	0.123697	1.62148	0.164671	2.06139	0.119666		0.556322	0.109283	0.697045	0.105278	0.517872	0.108245		0.590074	0.095773	0.653782	0.090689	0.461918	0.118069		0.236558	0.094291	0.292525	0.090655	0.113904	0.149947
137	662-668	PIGAGIC	5	0.267045	0.047132	0.43559	0.025415	0.631157	0.051544		0.429204	0.065057	0.626685	0.093978	0.718375	0.06201		0.234479	0.070025	0.203224	0.039429	0.154995	0.05407		0.233108	0.050119	0.194117	0.036875	0.21181	0.066974		0.062028	0.068128	0.064073	0.053287	-0.051699	0.118199
138	669-689	ASYQTQTKSHGSASSVASQSI	20	6.42835	0.308492	6.64952	0.142794	7.05744	0.123865		0.142176	0.342058	-0.059337	0.222503	-0.463652	0.142971		0.438393	0.324071	0.434158	0.17139	-0.26676	0.135081		0.158475	0.31055	0.025548	0.179997	-0.715707	0.135404		0.418353	0.36896	0.056357	0.235949	-0.137174	0.256209
139	669-691	ASYQTQTKSHGSASSVASQSIIA	22	5.66402	0.153962	6.26686	0.383459	6.68677	0.187553		0.819934	0.244116	0.51498	0.421458	0.543884	0.227795		0.820938	0.272584	0.729838	0.446068	-0.03096	0.224023		0.838449	0.19006	0.335575	0.384682	-0.16887	0.208857		0.898674	0.246759	0.26051	0.420692	-0.070614	0.232616
140	671-691	YQTQTKSHGSASSVASQSIIA	20	4.84025	0.208363	5.30763	0.103533	5.38195	0.129665		0.86049	0.300049	0.616144	0.136175	0.953604	0.170072		0.814281	0.245221	0.612707	0.164893	0.288819	0.164733		0.819924	0.234266	0.371533	0.104794	0.245662	0.173722		0.816258	0.251686	0.267868	0.159072	0.314097	0.159756
141	672-691	QTQTKSHGSASSVASQSIIA	19	4.89089	0.234751	5.0464	0.237137	5.17943	0.229039		-0.01482	0.332014	0.273819	0.257623	0.371541	0.229683		0.074029	0.311319	0.016696	0.252264	-0.115634	0.255485		-0.072971	0.271779	0.113682	0.26675	-0.164279	0.236236		0.141129	0.240466	0.091452	0.265571	-0.084894	0.281839
142	690-696	IAYTMSL	6	1.46364	0.090917	2.2452	0.056983	2.39219	0.15672		0.800427	0.092041	0.509062	0.121159	0.621649	0.161084		0.216857	0.113527	0.178701	0.064435	0.143363	0.171579		0.385895	0.095861	0.18896	0.104111	0.106849	0.167311		0.220767	0.091015	0.067025	0.101745	0.065579	0.252311
143	692-699	YTMSLGAE	7	2.23127	0.147233	2.53274	0.028645	2.53758	0.054539		0.443185	0.159488	0.422655	0.082322	0.382368	0.116227		0.205253	0.167016	0.19277	0.06836	0.269711	0.145484		0.144164	0.156101	0.132359	0.053489	0.139783	0.11706		0.13152	0.170137	0.067995	0.049591	0.006097	0.142543
144	720-728	TTEILPVSM	7	0.768471	0.023378	0.862277	0.034208	0.906997	0.035132		0.166704	0.059792	0.096967	0.091723	0.246454	0.041533		0.013056	0.05521	-0.047262	0.060408	-0.053894	0.038517		0.096576	0.073402	0.023852	0.051199	0.083219	0.046478		-0.108668	0.039723	-0.102635	0.080922	-0.208178	0.06366
145	721-727	TEILPVS	5	0.758647	0.057358	0.756872	0.061343	0.788973	0.0217		0.085407	0.059866	0.028248	0.071267	0.074297	0.029482		-0.020748	0.093159	0.079505	0.063595	0.019221	0.028338		0.006346	0.075128	0.07178	0.061359	0.033748	0.022271		0.269006	0.058033	0.16652	0.061823	0.18865	0.023022
146	721-728	TEILPVSM	6	0.516632	0.048626	0.547785	0.047228	0.564598	0.023003		0.090718	0.050554	0.111074	0.050404	0.278388	0.03244		0.026279	0.051316	0.066016	0.058443	0.022789	0.029622		0.049275	0.051383	0.029749	0.049218	0.05128	0.027378		0.020924	0.04974	-0.005283	0.049608	0.024235	0.033609
147	722-728	EILPVSM	5	0.058276	0.024911	0.062405	0.014509	0.080032	0.023669		0.051689	0.029775	0.102691	0.023621	0.260737	0.026957		0.026031	0.027304	0.028501	0.017967	0.021021	0.026531		0.040489	0.025715	0.059934	0.015143	0.053563	0.026056		0.016794	0.026545	0.017138	0.020646	0.015015	0.024824
148	729-738	TKTSVDCTMY	9	1.7737	0.251969	2.90592	0.370669	3.70923	0.408395		0.421869	0.356453	0.502467	0.388458	0.171842	0.434798		0.592922	0.252619	0.118352	0.377164	-0.569239	0.430727		0.2241	0.260656	-0.186018	0.454312	-0.17575	0.427634		0.260003	0.251979	-0.778651	0.375755	-0.06671	0.43606
149	738-745	YICGDSTE	7	0.937586	0.174911	1.06765	0.17012	1.29752	0.142177		0.154417	0.200924	0.124695	0.179478	0.052556	0.176004		0.203533	0.202942	0.469272	0.197079	0.022674	0.14814		0.267139	0.195133	0.352501	0.180893	0.048275	0.169868		0.085739	0.176995	0.242611	0.17969	0.167082	0.180325
150	739-745	ICGDSTE	6	1.0046	0.097815	1.17183	0.111769	1.27287	0.06033		0.374212	0.131268	0.147889	0.114829	0.018504	0.067468		0.405751	0.099529	0.263113	0.115534	0.123194	0.10976		0.305038	0.117112	0.13621	0.135117	-0.020753	0.100971		0.222898	0.123492	0.120661	0.132563	0.451054	0.06106
151	750-756	LLQYGSF	6	1.77108	0.151162	2.18653	0.072511	2.2294	0.05192		0.229828	0.155975	-0.080348	0.087366	-0.126572	0.055925		0.187707	0.167261	0.059379	0.10046	-0.131231	0.063215		0.209956	0.162254	-0.047965	0.081144	-0.190976	0.063344		0.094831	0.181944	-0.008652	0.121456	0.007477	0.088501
152	757-766	CTQLKRALTG	9	2.71007	0.242688	4.35583	0.121383	4.87535	0.155083		0.07275	0.28676	-0.168452	0.169527	-0.179996	0.204944		0.625387	0.297178	0.431158	0.201485	-0.088491	0.198429		0.645042	0.275687	0.199533	0.165619	-0.165916	0.20765		0.43596	0.299103	0.016914	0.183006	-0.151734	0.244567
153	757-768	CTQLKRALTGIA	11	2.54043	0.195246	5.08549	0.179446	5.92561	0.173715		0.208202	0.216716	-0.343693	0.218655	0.07664	0.177414		0.750862	0.252563	0.621187	0.194318	0.235232	0.177396		0.758467	0.225957	0.28313	0.243843	0.204697	0.178541		0.58793	0.250743	-0.078744	0.181334	0.102946	0.242008
154	757-779	CTQLKRALTGIAVEQDKNTQEVF	22	3.16069	0.205913	5.23529	0.064505	8.06473	0.148358		0.463875	0.209758	-0.788565	0.107317	-2.87911	0.160189		0.480377	0.330887	0.735321	0.316826	-2.21803	0.155736		0.772043	0.262071	-0.661215	0.109858	-3.40377	0.187809		0.244909	0.247692	0.949636	0.155711	-0.812666	0.253351
155	761-770	KRALTGIAVE	9	0.916139	0.101488	2.42701	0.22227	4.11189	0.065341		0.403229	0.251418	0.196903	0.291475	-0.131794	0.151475		0.614037	0.291223	1.13229	0.273792	0.149596	0.141883		0.678965	0.209117	0.90828	0.290972	0.052235	0.139383		0.503901	0.211317	0.386365	0.345754	0.054813	0.1929
156	761-779	KRALTGIAVEQDKNTQEVF	18	1.32716	0.189905	2.85165	0.176417	5.23404	0.206122		0.516109	0.250016	0.684487	0.214253	0.736508	0.29424		0.558459	0.264518	1.25845	0.196558	0.407383	0.319156		0.632929	0.212041	1.20364	0.206035	0.582786	0.263901		0.498177	0.225711	0.800178	0.192737	0.306037	0.389825
157	767-779	IAVEQDKNTQEVF	12	0.404008	0.110869	0.908174	0.12315	2.14701	0.106896		0.199821	0.1177	0.439607	0.130709	0.750251	0.138824		0.035141	0.113861	0.502871	0.13633	0.211638	0.120576		0.201672	0.125211	0.42495	0.14145	0.229311	0.124129		0.019482	0.11391	0.214126	0.137489	0.113208	0.180173
158	769-779	VEQDKNTQEVF	10	0.318616	0.014627	0.541436	0.09917	1.21007	0.091476		0.312418	0.019867	0.523201	0.114654	0.832932	0.105892		0.21317	0.023636	0.31646	0.116771	0.237313	0.12148		0.230852	0.020987	0.252243	0.099807	0.277248	0.111925		0.182432	0.028669	0.165496	0.099912	0.176675	0.166237
159	780-793	AQVKQIYKTPPIKY	11	4.14171	0.275871	5.0984	0.143507	5.56961	0.112859		0.888396	0.323516	0.185256	0.209456	-0.218782	0.167693		0.283701	0.320396	0.187379	0.250569	-0.207593	0.174232		0.259785	0.333509	0.135136	0.191573	-0.34697	0.201473		0.158143	0.377956	0.109555	0.228104	-0.141483	0.308628
160	813-838	SPIEDLLFNKVTLADAGFIKQYGDCL	24	8.78494	0.014634	10.0993	0.242125	10.1592	0.360925		0.784806	0.223665	-0.263978	0.253855	-0.407256	0.426791		1.02258	0.21409	-0.150958	0.242594	-0.359961	0.394088		0.864634	0.021661	-0.126561	0.244072	-0.781916	0.361278		0.938353	0.180293	0.053664	0.294515	-0.294361	0.416111
161	819-825	LFNKVTL	6	2.29033	0.172828	2.44617	0.082986	2.46252	0.092071		0.146451	0.178236	-0.061064	0.09938	-0.052993	0.105051		0.146186	0.190837	0.02672	0.095229	-0.108938	0.097688		0.129923	0.182752	-0.06235	0.085864	-0.122095	0.096501		0.101633	0.185491	-0.052529	0.098812	-0.062083	0.096546
162	819-830	LFNKVTLADAGF	11	3.82662	0.345475	4.02981	0.16973	4.11146	0.128963		0.24173	0.373838	-0.020506	0.201204	-0.041155	0.154305		0.270221	0.364899	0.194445	0.23366	-0.142809	0.163615		0.14089	0.353884	0.142105	0.174219	-0.279766	0.195085		0.344666	0.38274	0.045913	0.223276	-0.053537	0.243515
163	820-829	FNKVTLADAG	9	3.40213	0.093947	3.64593	0.090015	3.7454	0.101266		0.308971	0.1373	0.067505	0.123938	-0.011176	0.118823		0.333609	0.142501	0.207907	0.09627	-0.029035	0.104164		0.291901	0.126345	0.095411	0.096699	-0.102832	0.102441		0.219098	0.125373	0.104355	0.111121	-0.067273	0.112831
164	820-830	FNKVTLADAGF	10	3.92133	0.162791	4.14002	0.125684	4.21017	0.153727		0.168505	0.204084	-0.110957	0.155295	-0.170988	0.174005		0.160177	0.200202	0.110116	0.170368	-0.142026	0.164384		0.106838	0.195374	-0.029369	0.130254	-0.285708	0.170047		0.0785	0.212176	-0.09664	0.173473	-0.16407	0.234498
165	820-845	FNKVTLADAGFIKQYGDCLGDIAARD	25	4.53969	0.327808	5.94116	0.365689	6.19316	0.315718		-0.507682	0.356898	-0.52605	0.375207	0.011168	0.34275		0.945261	0.450521	0.364027	0.366371	0.106721	0.34485		0.593212	0.361224	0.19411	0.580098	0.357317	0.591628		0.7249	0.330781	0.634552	0.36682	-0.19781	0.347507
166	821-830	NKVTLADAGF	9	3.78304	0.185923	3.94548	0.150526	4.04486	0.122326		0.109045	0.209741	-0.094639	0.17633	-0.196416	0.139842		-0.050505	0.191557	0.101203	0.212719	-0.288174	0.15273		0.144393	0.187254	-0.064498	0.215444	-0.326583	0.123403		0.036388	0.290698	-0.014789	0.193777	-0.237464	0.361675
167	831-842	IKQYGDCLGDIA	11	3.44878	0.141355	3.72358	0.089053	3.74473	0.110542		0.052631	0.142759	-0.135377	0.131318	-0.076321	0.14646		-0.17668	0.185508	0.220219	0.139771	0.036027	0.134801		0.331812	0.295338	0.480327	0.089283	-0.312636	0.158331		n.a.	n.a.	0.060562	0.099173	-0.214457	0.110586
168	831-845	IKQYGDCLGDIAARD	14	5.23904	0.208286	5.44148	0.132964	5.70999	0.098559		0.185067	0.299497	-0.176602	0.16551	-0.439472	0.161703		0.183197	0.262128	0.421764	0.181533	-0.256338	0.170108		0.125096	0.231618	-0.050658	0.142638	-0.346467	0.16774		0.106115	0.248555	0.047325	0.197928	-0.340208	0.17923
169	831-848	IKQYGDCLGDIAARDLIC	17	6.02728	0.053445	6.03125	0.063645	6.22648	0.152407		-0.002529	0.116182	-0.067071	0.106773	-0.12311	0.179975		-0.103586	0.134292	-0.029782	0.147686	-0.185772	0.182062		0.001763	0.134844	-0.173062	0.072186	-0.177474	0.171365		0.029429	0.073064	-0.107033	0.170724	-0.145065	0.15616
170	849-855	AQKFNGL	6	1.3584	0.194707	1.79607	0.130796	1.82949	0.1102		0.462589	0.209308	0.181957	0.172937	0.1027	0.141786		0.309593	0.216869	0.197354	0.193201	-0.006968	0.131365		0.292641	0.207655	0.043927	0.137967	-0.076878	0.131667		0.216352	0.206107	-0.029121	0.149257	0.00322	0.146275
171	855-862	LTVLPPLL	5	1.33356	0.078776	1.93019	0.039092	2.45728	0.030995		0.262165	0.081997	-0.026725	0.045352	-0.120175	0.034195		0.001253	0.089925	0.095383	0.081024	0.018691	0.045085		0.018599	0.098218	0.035251	0.051196	-0.039704	0.049563		-0.027823	0.090481	-0.082182	0.04767	-0.128029	0.106066
172	855-863	LTVLPPLLT	6	1.50738	0.106406	2.31216	0.119577	3.26873	0.14492		0.623149	0.154694	0.293376	0.157448	-0.067735	0.202403		0.030382	0.166236	0.197294	0.187949	0.132253	0.206001		0.099481	0.151266	0.114766	0.1569	0.026233	0.206501		-0.002445	0.164681	-0.034601	0.151324	-0.151218	0.219476
173	856-862	TVLPPLL	4	0.720506	0.034803	1.31912	0.025057	1.7504	0.012837		0.230565	0.041924	-0.047353	0.02611	-0.091152	0.019405		0.037372	0.04868	0.079847	0.059626	0.068304	0.020663		0.044295	0.04285	-0.017257	0.028503	0.004366	0.018923		-0.011374	0.049713	-0.055791	0.035929	-0.084474	0.081476
174	856-863	TVLPPLLT	5	0.910556	0.064039	1.6456	0.059882	2.60518	0.036085		0.596005	0.078748	0.357893	0.08963	-0.011133	0.049888		-0.007329	0.077625	0.23831	0.09752	0.123662	0.063681		0.03234	0.068021	0.142935	0.064637	0.056488	0.043642		-0.005785	0.079343	-0.030692	0.074968	-0.132991	0.135198
175	856-866	TVLPPLLTDEM	8	1.45732	0.079049	2.56969	0.039736	3.83816	0.036738		0.932175	0.154716	0.604028	0.058846	-0.07359	0.067006		0.16437	0.098172	0.447677	0.065464	0.134012	0.125533		0.113482	0.096383	0.282309	0.048	-0.061601	0.080291		0.154681	0.128108	0.089811	0.074643	-0.068093	0.170442
176	867-874	IAQYTSAL	7	0.107937	0.045504	0.112785	0.029679	0.22092	0.034231		0.456138	0.05427	1.26347	0.095238	1.77511	0.054275		0.004999	0.050841	0.070573	0.032633	0.059192	0.038362		0.025325	0.047565	0.076664	0.031459	0.091218	0.036052		-0.03581	0.04763	-0.016877	0.033283	-0.03863	0.043454
177	875-882	LAGTITSG	7	0.236138	0.026373	0.418196	0.065948	0.698581	0.128741		0.792828	0.1288	0.747235	0.151475	0.667882	0.129001		0.045647	0.027976	0.1132	0.115188	0.114472	0.212194		0.042796	0.02719	0.096165	0.075021	0.076059	0.141677		0.078229	0.032893	-0.002599	0.067783	0.054346	0.213953
178	883-899	WTFGAGPALQIPFPMQM	13	0.654506	0.056977	0.744756	0.093536	0.799297	0.101034		n.a.	n.a.	0.435896	0.093536	0.757168	0.130523		n.a.	n.a.	n.a.	n.a.	n.a.	n.a.		0.406718	0.056977	0.45577	0.108046	0.54719	0.113118		0.846376	0.058605	1.07212	0.11421	0.476265	0.117185
179	889-898	PALQIPFPMQ	6	0.774223	0.021761	0.856316	0.136177	1.29425	0.105104		0.1445	0.024143	0.485693	0.310234	0.648559	0.108027		0.363816	0.021761	0.590991	0.136177	0.148059	0.117883		0.080322	0.201337	0.475364	0.19147	0.122884	0.147911		0.063165	0.037102	0.484804	0.136177	0.06647	0.105104
180	889-899	PALQIPFPMQM	7	0.642289	0.100073	0.84706	0.091186	1.09706	0.077596		0.682866	0.118346	0.466143	0.128365	0.100205	0.188183		-0.03248	0.113856	0.275298	0.107608	-0.000691	0.099246		0.245657	0.116305	0.002646	0.188256	0.031373	0.176411		-0.076334	0.101035	-0.017704	0.123518	-0.117618	0.101953
181	899-913	MAYRFNGIGVTQNVL	14	1.83818	0.032689	2.70946	0.155852	4.13056	0.198558		2.48529	0.163535	2.27807	0.163002	1.93361	0.243875		0.369023	0.133013	0.56061	0.15593	-0.003423	0.220009		0.427416	0.134305	0.289466	0.203928	-0.033613	0.219419		0.272018	0.109448	0.048427	0.168646	-0.186449	0.338035
182	900-910	AYRFNGIGVTQ	10	1.74964	0.155942	2.32451	0.166319	3.45044	0.033891		1.34886	0.27465	1.54488	0.277314	0.961892	0.091887		0.023137	0.15854	0.320328	0.168727	-0.058934	0.051174		0.111431	0.228555	0.045397	0.168508	-0.109167	0.042579		0.097925	0.161219	-0.273638	0.288444	-0.280572	0.179163
183	900-913	AYRFNGIGVTQNVL	13	1.68977	0.22517	2.28665	0.193829	3.39277	0.188659		1.87814	0.278317	1.81178	0.257301	1.56222	0.25509		0.032789	0.24858	0.299477	0.236502	-0.018811	0.198418		0.261697	0.247183	0.261498	0.219787	0.029701	0.207915		-0.143015	0.259434	-0.109384	0.211647	-0.082689	0.223222
184	901-913	YRFNGIGVTQNVL	12	1.84395	0.136219	2.54102	0.111819	3.56158	0.071229		1.83	0.18594	1.53664	0.134059	1.30256	0.128227		0.076498	0.151164	0.239353	0.174063	-0.044942	0.104174		0.176839	0.158662	0.146664	0.134392	-0.076929	0.097163		0.183214	0.164083	0.082511	0.114555	-0.056873	0.148451
185	906-913	IGVTQNVL	7	0.853064	0.089137	1.0693	0.06723	1.63937	0.095044		1.25097	0.126904	1.12666	0.127426	1.06308	0.115733		0.028184	0.103665	0.174698	0.075101	0.020084	0.09728		0.082802	0.095044	0.123061	0.084897	0.0078	0.111918		0.032638	0.111541	0.051213	0.071996	-0.079582	0.132438
186	914-921	YENQKLIA	7	1.60697	0.148884	1.67862	0.062507	2.14663	0.094112		0.457182	0.162632	0.8597	0.234749	0.555847	0.140611		0.067154	0.16315	0.303882	0.123423	0.008869	0.097837		0.149838	0.165704	0.251569	0.083079	0.037217	0.116072		0.102543	0.153267	0.141975	0.088871	0.099909	0.184978
187	914-924	YENQKLIANQF	10	1.6165	0.181625	2.03466	0.109044	2.76088	0.186017		0.461196	0.195102	0.559156	0.290661	0.230084	0.18793		0.166275	0.208528	0.07727	0.171065	-0.136591	0.400889		-0.130944	0.256136	-0.066341	0.19968	-0.476498	0.186677		0.161219	0.210241	0.144185	0.121829	0.060065	0.229572
188	914-935	YENQKLIANQFNSAIGKIQDSL	21	6.80184	0.203159	7.55561	0.136405	9.94389	0.494615		0.846864	0.245551	1.33299	0.174285	1.19311	0.534248		0.160871	0.329597	0.276902	0.136743	-0.232432	0.684025		0.037437	0.334604	0.172147	0.206597	0.409657	0.515709		-0.770457	0.204495	-0.171612	0.136743	-0.610183	0.570103
189	920-927	IANQFNSA	7	0.452896	0.08145	0.768771	0.120904	1.63394	0.1278		0.368105	0.089722	0.560332	0.163221	0.383254	0.154071		0.070952	0.090889	0.257323	0.132923	0.073723	0.13774		0.112133	0.090318	0.216602	0.124851	0.077415	0.132168		0.064646	0.087901	0.103122	0.128051	0.185716	0.153815
190	920-935	IANQFNSAIGKIQDSL	15	4.42444	0.392926	5.00629	0.204291	6.26862	0.241018		0.261761	0.422477	0.340405	0.269196	0.082388	0.257655		0.253106	0.424446	0.063836	0.257673	-0.106287	0.278625		0.165641	0.417816	0.0392	0.214537	-0.211866	0.28214		0.124817	0.425965	-0.117706	0.21561	-0.351327	0.519074
191	920-942	IANQFNSAIGKIQDSLSSTPSAL	21	7.35496	0.344618	7.14293	0.096003	8.45727	0.06967		0.270159	0.389297	1.43769	0.17939	1.15499	0.148556		0.336629	0.444734	1.48508	0.3099	0.971481	0.119626		0.248914	0.346256	1.23085	0.141744	0.788081	0.252852		0.3837	0.370304	0.919232	0.155451	0.422111	0.174918
192	922-935	NQFNSAIGKIQDSL	13	4.58955	0.188043	5.29384	0.06264	6.47708	0.17173		0.132951	0.245221	0.005982	0.152819	-0.231541	0.19693		-0.035001	0.239185	-0.312026	0.120249	-0.475604	0.2173		0.004411	0.206908	-0.345492	0.10366	-0.388536	0.213148		0.097926	0.191813	-0.516837	0.071669	-0.442462	0.200689
193	924-942	FNSAIGKIQDSLSSTPSAL	17	6.81843	0.525489	7.55709	0.305747	8.20838	0.204487		0.050529	0.52992	-0.355809	0.413908	-0.584707	0.253078		0.214257	0.560311	-0.248011	0.311728	-0.613694	0.311733		-0.038563	0.547426	-0.283245	0.383267	-0.607339	0.234955		0.431569	0.597703	-0.088733	0.489621	-0.54291	0.246093
194	925-935	NSAIGKIQDSL	10	3.88762	0.05397	4.37435	0.122106	4.95903	0.00827		0.04647	0.056864	-0.152354	0.143942	-0.255066	0.040451		0.082614	0.058281	-0.13444	0.162321	-0.287376	0.062312		0.02897	0.072006	-0.16477	0.134436	-0.366943	0.076674		-0.009505	0.101642	-0.171872	0.147077	-0.421817	0.238806
195	925-942	NSAIGKIQDSLSSTPSAL	16	6.82029	0.170028	7.35253	0.113938	7.96387	0.118852		0.061573	0.237169	-0.465323	0.223406	-0.524235	0.194549		0.066071	0.245728	-0.174365	0.178633	-0.520184	0.169038		0.015394	0.187464	-0.319143	0.121333	-0.534779	0.164639		0.204807	0.223801	-0.344627	0.170869	-0.666048	0.167611
196	928-942	IGKIQDSLSSTPSAL	13	4.29838	0.152657	4.77216	0.275285	4.84544	0.179418		0.190742	0.187908	-0.248933	0.291043	-0.300151	0.281053		0.170491	0.318884	-0.030053	0.312743	-0.31774	0.180559		0.204849	0.180687	-0.117889	0.296272	-0.433603	0.253923		0.325283	0.322246	0.004022	0.28737	-0.023417	0.180403
197	936-942	SSTPSAL	5	1.68398	0.051205	1.77929	0.078723	1.79632	0.078971		0.073642	0.076301	-0.036784	0.09472	-0.051943	0.091448		0.042704	0.091455	0.01171	0.097418	-0.060743	0.083677		0.074442	0.077254	-0.005591	0.081509	-0.069633	0.091927		0.029841	0.071726	-0.02159	0.097563	-0.037347	0.125949
198	936-958	SSTPSALGKLQDVVNHNAQALNT	21	9.34641	0.363506	11.0827	0.235961	11.2866	0.15382		0.667236	0.374836	-0.264949	0.258719	-0.510807	0.182167		1.14078	0.451449	-0.164487	0.274315	-0.525472	0.179575		0.842901	0.367886	-0.03549	0.254819	-0.561234	0.210265		1.21677	0.486932	-0.398174	0.344031	-0.587292	0.224883
199	943-958	GKLQDVVNHNAQALNT	15	6.18893	0.271498	8.07797	0.007902	8.01781	0.09634		n.a.	n.a.	-0.314105	0.073146	-0.217307	0.096644		0.948712	0.415205	-0.093498	0.173117	-0.316565	0.111478		0.772988	0.282615	-0.283489	0.066763	-0.413988	0.210229		0.513197	0.271502	-0.254524	0.189262	-0.281039	0.157414
200	946-958	QDVVNHNAQALNT	12	3.77325	0.128618	4.8965	0.128956	4.96163	0.081191		0.424869	0.175168	-0.095059	0.132958	-0.114824	0.092097		0.470954	0.222022	0.0511	0.163829	-0.154674	0.091663		0.607866	0.174904	-0.080065	0.170067	-0.315265	0.085548		0.179581	0.252777	-0.020814	0.151199	-0.149115	0.257819
201	948-958	VVNHNAQALNT	10	3.0462	0.196063	3.74429	0.093332	3.86467	0.096271		0.434358	0.222987	-0.046904	0.119066	-0.133283	0.116388		0.481397	0.234616	0.156498	0.100522	-0.149558	0.116547		0.51935	0.208785	0.040877	0.103409	-0.17213	0.116296		0.298523	0.246598	-0.07022	0.115825	-0.179062	0.16054
202	957-974	NTLVKQLSSKFGAISSVL	17	7.69	0.206199	10.2728	0.195556	10.8034	0.180751		1.04394	0.520539	-0.424297	0.23699	-0.488976	0.423021		1.66637	0.213938	-0.190136	0.269513	-0.683406	0.195448		1.40462	0.247744	-0.296979	0.260227	-0.702761	0.433006		1.64926	0.424381	-0.072208	0.383304	-0.547353	0.273553
203	959-967	LVKQLSSKF	8	2.60081	0.10607	3.21369	0.036809	3.30049	0.065144		0.136093	0.112969	-0.014127	0.094231	0.034809	0.066339		0.559766	0.173127	0.142479	0.105483	0.048592	0.066556		0.450765	0.162951	-0.004043	0.059814	-0.074407	0.074321		0.442999	0.177042	0.004053	0.17857	-0.186027	0.092787
204	959-971	LVKQLSSKFGAIS	12	4.77516	0.16254	5.98833	0.1104	5.99279	0.075833		0.410836	0.176154	-0.27831	0.129816	-0.235909	0.088744		0.992547	0.187557	0.013738	0.176289	-0.269344	0.101044		0.975564	0.177509	-0.181354	0.125173	-0.295482	0.110464		0.827026	0.254597	-0.084975	0.113268	-0.172461	0.180234
205	959-974	LVKQLSSKFGAISSVL	15	5.82353	0.228989	7.15822	0.106688	7.25266	0.113064		0.488625	0.253814	-0.21634	0.145084	-0.254289	0.146489		1.16355	0.271428	0.052977	0.165657	-0.268043	0.15279		1.04134	0.259676	-0.152128	0.108172	-0.416567	0.16922		0.935825	0.274379	-0.148919	0.15546	-0.281997	0.253452
206	959-976	LVKQLSSKFGAISSVLND	17	7.00644	0.275117	8.57822	0.094406	8.7911	0.106406		0.328702	0.302855	-0.535523	0.151113	-0.602503	0.150082		0.980915	0.306231	-0.302223	0.102731	-0.781074	0.173514		1.43292	0.282353	0.010611	0.155751	-0.37046	0.178987		1.4675	0.357575	0.186388	0.188494	-0.310373	0.236603
207	960-974	VKQLSSKFGAISSVL	14	5.10368	0.227482	6.20005	0.11205	6.16748	0.06024		0.300749	0.24089	-0.452192	0.173278	-0.380159	0.092401		0.748882	0.262147	-0.089383	0.257564	-0.374477	0.09248		0.676899	0.249742	-0.320137	0.152614	-0.441625	0.137304		0.417433	0.352872	-0.262633	0.198886	-0.349265	0.176204
208	968-974	GAISSVL	6	2.35806	0.055686	2.78088	0.032462	2.85113	0.051451		0.157221	0.124703	-0.074522	0.132089	-0.143368	0.100762		0.244912	0.10517	0.059376	0.061151	-0.182418	0.084167		0.274358	0.109433	-0.160389	0.077249	-0.099528	0.068078		0.421094	0.077148	0.013941	0.056904	-0.057726	0.072556
209	977-987	ILSRLDPPEAE	8	1.85918	0.074332	2.57869	0.068005	2.60358	0.091932		0.217655	0.127285	-0.136601	0.101345	-0.04359	0.110694		0.684895	0.100043	0.145119	0.081794	-0.037124	0.104528		0.711639	0.082559	0.022049	0.098608	-0.080658	0.102024		0.608441	0.172541	0.028424	0.10902	0.016283	0.134464
210	979-987	SRLDPPEAE	6	1.6146	0.055721	2.14473	0.059715	2.20691	0.057027		0.163609	0.070455	-0.058523	0.085445	-0.064037	0.064293		0.516266	0.086256	0.050144	0.068949	-0.05564	0.06529		0.491603	0.068469	0.01875	0.060708	-0.10396	0.077005		0.44661	0.088629	0.014223	0.079142	-0.027622	0.098831
211	979-989	SRLDPPEAEVQ	8	2.75811	0.070306	3.69531	0.068949	3.74782	0.0671		0.376186	0.125695	-0.096787	0.082818	-0.088525	0.076186		0.796604	0.121962	0.067218	0.095469	-0.051872	0.087364		0.783323	0.079233	0.005706	0.073726	-0.096291	0.083553		0.702295	0.129827	0.008989	0.079936	-0.06409	0.112259
212	990-997	IDRLITGR	7	0.183429	0.012833	0.356402	0.00689	1.41996	0.048749		1.1065	0.111284	1.71153	0.161926	1.33022	0.094515		0.23175	0.064643	1.51111	0.082025	1.69728	0.074403		0.361966	0.014519	1.5575	0.026386	1.63709	0.064404		0.135863	0.0428	0.991749	0.048502	1.19389	0.185756
213	994-1003	ITGRLQSLQT	9	0.292675	0.098286	0.959774	0.063511	1.70028	0.11696		0.537854	0.113945	0.851857	0.307713	1.28532	0.127925		0.390809	0.20602	0.668602	0.067823	1.67154	0.170926		0.531458	0.108353	0.693124	0.084796	1.60781	0.142645		0.294697	0.108965	0.357634	0.170774	0.988445	0.403774
214	1004-1012	YVTQQLIRA	8	0.121652	0.053951	0.23547	0.038225	0.94667	0.078291		0.144987	0.057157	0.48283	0.12766	0.856302	0.083595		0.079898	0.070983	0.143637	0.060858	0.138155	0.102733		0.12442	0.056302	0.145147	0.055973	0.106347	0.122979		0.082144	0.064135	0.084182	0.046771	-0.150213	0.162471
215	1004-1014	YVTQQLIRAAE	10	0.199633	0.084969	0.515075	0.069479	1.61536	0.106342		0.303225	0.10339	0.809545	0.117707	1.23901	0.185226		0.050042	0.124106	0.028169	0.156162	0.124883	0.119604		0.081211	0.102549	0.023205	0.091346	-0.05565	0.140272		0.053306	0.096101	-0.086282	0.091856	-0.216439	0.168741
216	1013-1021	AEIRASANL	8	0.216758	0.048341	0.368334	0.049458	1.46901	0.030191		0.499722	0.06442	1.0473	0.154619	1.01282	0.078789		0.063923	0.05151	0.178151	0.053353	0.08507	0.069637		0.117768	0.048843	0.189198	0.05017	0.093237	0.044713		0.081972	0.052381	0.059711	0.05141	0.035585	0.073264
217	1015-1021	IRASANL	6	0.165035	0.054921	0.276239	0.062697	1.17222	0.054434		0.360529	0.082616	0.834138	0.125113	0.7869	0.102184		0.015456	0.078777	0.134235	0.085269	0.072668	0.091645		0.062535	0.071527	0.147841	0.091995	0.078117	0.082414		0.003642	0.075514	0.017139	0.084138	-0.049048	0.145611
218	1022-1028	AATKMSE	6	0.15113	0.060984	0.156154	0.019682	0.21191	0.049162		0.168266	0.061504	0.346924	0.0347	0.598408	0.056468		0.099368	0.064484	0.183308	0.045483	0.094773	0.053605		0.168366	0.062968	0.173086	0.024775	0.148047	0.050909		0.085214	0.06769	0.121465	0.043687	0.087073	0.062192
219	1022-1046	AATKMSECVLGQSKRVDFCGKGYHL	24	2.4324	0.38524	3.21366	0.301076	3.78592	0.328651		n.a.	n.a.	n.a.	n.a.	0.943642	0.347183		n.a.	n.a.	0.289639	0.351406	n.a.	n.a.		n.a.	n.a.	0.382454	0.328539	n.a.	n.a.		0.198717	0.4195	0.088575	0.318941	0.143424	0.412209
220	1029-1039	CVLGQSKRVDF	10	1.5217	0.163009	2.0474	0.106922	2.1969	0.10439		0.300911	0.183406	0.161547	0.163559	0.344347	0.138291		0.020097	0.191123	0.163435	0.21797	-0.092014	0.140804		0.120194	0.200832	-0.008706	0.130788	-0.081869	0.143347		-0.070271	0.204671	-0.104387	0.14037	-0.119359	0.163002
221	1029-1046	CVLGQSKRVDFCGKGYHL	17	1.73625	0.232504	2.57148	0.111138	2.88247	0.200682		0.336884	0.251625	0.038937	0.171623	0.41789	0.22748		0.017508	0.288615	0.060041	0.13502	-0.016756	0.221347		0.140443	0.234001	-0.047976	0.138034	-0.005938	0.223134		0.008332	0.290356	-0.251747	0.129661	-0.057718	0.268137
222	1031-1039	LGQSKRVDF	8	1.25091	0.13118	1.66507	0.035721	1.87266	0.07749		0.290589	0.144146	-0.04441	0.042625	0.198844	0.111715		0.031709	0.143597	-0.026652	0.072024	-0.129529	0.080658		0.188401	0.136819	0.054352	0.040751	-0.185557	0.138189		0.113617	0.190553	-0.000134	0.056864	-0.122454	0.108036
223	1031-1046	LGQSKRVDFCGKGYHL	15	1.77257	0.260416	2.17367	0.227944	2.72403	0.138168		0.267199	0.270983	0.286057	0.261932	0.285486	0.169298		-0.065778	0.273553	0.360669	0.252281	-0.006856	0.156383		-0.104726	0.261826	0.223025	0.237714	-0.082751	0.222945		-0.098493	0.298522	-0.033882	0.233817	-0.018335	0.138541
224	1040-1046	CGKGYHL	6	0.399548	0.076864	0.484707	0.071603	0.69777	0.066687		0.043897	0.086133	0.055119	0.074571	0.059688	0.069881		0.042179	0.080287	0.12172	0.100234	0.033047	0.07245		0.09267	0.079731	0.071398	0.071631	0.058484	0.073308		0.017946	0.080416	0.03534	0.076787	-0.005918	0.092937
225	1047-1059	MSFPQSAPHGVVF	10	0.248962	0.074352	0.269884	0.056575	0.335934	0.054875		0.024376	0.07771	-0.02824	0.056678	0.053704	0.062928		-0.090917	0.074793	-0.038172	0.061707	-0.093628	0.061729		-0.00515	0.07724	-0.014074	0.059656	-0.029809	0.056157		-0.0721	0.076732	-0.099546	0.057442	-0.0573	0.056934
226	1050-1060	PQSAPHGVVFL	8	0.188364	0.05849	0.193568	0.055095	0.233236	0.059597		0.118572	0.068648	0.088043	0.062767	0.149511	0.087968		0.058352	0.068032	0.083827	0.065624	0.032437	0.062101		0.133555	0.079541	0.2906	0.158413	0.119078	0.162822		0.080965	0.075427	0.084122	0.070193	0.084751	0.116359
227	1065-1076	VPAQEKNFTTAP	9	1.36111	0.166188	1.46218	0.196835	1.53024	0.255828		0.884038	0.187776	1.3151	0.212307	1.28396	0.308033		1.05341	0.188131	1.66572	0.202719	1.57671	0.279958		1.06481	0.211836	1.54927	0.231986	1.52281	0.284749		0.681854	0.261305	0.929271	0.280009	1.28806	0.367488
228	1068-1089	QEKNFTTAPAICHDGKAHFPRE	19	3.86196	0.148683	4.37019	0.115932	5.03314	0.168908		0.39622	0.273724	0.298649	0.140698	0.397004	0.202859		-2.14785	0.155268	-1.56528	0.118998	-1.15838	0.171027		-2.43125	0.17167	-0.951646	0.191276	-0.732404	0.187621		1.02227	0.266691	0.622358	0.306832	0.692528	0.201873
229	1076-1092	PAICHDGKAHFPREGVF	14	0.77263	0.111124	0.992958	0.089422	1.25758	0.042555		0.169794	0.127716	0.149079	0.097933	0.196999	0.082192		0.076379	0.117506	0.280069	0.121348	0.037739	0.04533		0.119462	0.124195	0.144455	0.106709	0.073399	0.068916		0.276432	0.206702	0.105795	0.104095	0.023985	0.056527
230	1094-1111	SNGTHWFVTQRNFYEPQI	16	1.2164	0.178023	1.82349	0.128894	2.39433	0.097487		0.751614	0.218288	0.568003	0.140465	0.422473	0.162877		0.163105	0.194604	0.347795	0.202913	0.065795	0.111614		0.222355	0.199498	0.135023	0.191712	0.030055	0.14919		0.188071	0.273366	0.173472	0.23404	0.047186	0.192786
231	1100-1113	FVTQRNFYEPQIIT	12	1.73034	0.189531	2.40443	0.130028	3.27325	0.0252		0.221966	0.192601	0.559258	0.184025	0.870917	0.050539		0.057689	0.215747	0.291836	0.219205	0.129744	0.086003		0.162057	0.193405	0.185857	0.130256	0.033936	0.026352		0.055607	0.195069	-0.04279	0.149137	-0.053162	0.173054
232	1100-1114	FVTQRNFYEPQIITT	13	1.94048	0.201299	2.86804	0.158571	3.67838	0.113466		0.365054	0.207183	0.374764	0.161285	0.79958	0.129969		0.097802	0.219153	0.11771	0.17786	-0.022712	0.148168		0.262153	0.217302	0.045453	0.158925	-0.029853	0.137833		0.044021	0.215849	-0.064184	0.162649	-0.06265	0.215893
233	1100-1116	FVTQRNFYEPQIITTDN	15	2.22713	0.294664	3.2167	0.126752	4.15697	0.142321		0.364467	0.299138	0.366072	0.24242	0.621625	0.249303		-0.24325	0.305058	-0.340599	0.247393	-0.716654	0.142545		0.420886	0.297593	0.18966	0.143959	0.208183	0.143788		0.061137	0.304155	-0.01511	0.162826	0.043361	0.291367
234	1100-1117	FVTQRNFYEPQIITTDNT	16	2.18134	0.297724	3.14581	0.248097	4.2394	0.198916		0.488474	0.301592	0.710673	0.304836	0.886507	0.199076		0.229776	0.304888	0.390804	0.248097	0.065422	0.291892		0.321124	0.311675	0.241824	0.260955	0.041079	0.234403		0.150067	0.311115	0.007556	0.259892	-0.111441	0.361193
235	1100-1118	FVTQRNFYEPQIITTDNTF	17	2.15217	0.350945	2.89613	0.339199	3.95623	0.301102		0.480733	0.362306	0.790677	0.386595	1.08845	0.324876		0.158692	0.370544	0.532772	0.39046	0.11221	0.347874		0.327044	0.357786	0.39879	0.353001	0.123653	0.37713		0.102877	0.363285	0.160339	0.341176	0.041795	0.400726
236	1106-1114	FYEPQIITT	7	1.29218	0.087997	1.99823	0.067527	2.71657	0.025456		0.200949	0.097407	0.121057	0.087213	0.261898	0.042056		-0.009494	0.091319	-0.038638	0.072066	-0.051949	0.055407		0.140673	0.088157	0.054149	0.076864	-0.047247	0.026027		0.035314	0.100496	-0.094326	0.078091	-0.074591	0.093514
237	1118-1124	FVSGNCD	6	0.948666	0.116387	1.14871	0.157011	1.28602	0.12202		0.440575	0.136866	0.294199	0.159763	0.258185	0.122915		0.194368	0.129116	0.264162	0.163994	0.08533	0.133024		0.216476	0.121129	0.19168	0.161539	0.070052	0.135297		0.144851	0.134117	0.110826	0.168925	0.120836	0.138715
238	1145-1166	FKEELDKYFKNHTSPDVDLGDI	20	9.70871	0.113713	10.0366	0.216103	10.1055	0.060515		0.350292	0.148313	-0.045629	0.240365	-0.060615	0.17505		0.489531	0.130472	0.210897	0.226848	0.047456	0.083354		0.300968	0.125464	0.079306	0.218951	-0.203424	0.159967		0.447016	0.127627	0.265961	0.239346	0.112841	0.176892
239	1154-1173	KNHTSPDVDLGDISGINASV	18	1.7698	0.236394	2.9926	0.14976	5.26962	0.156581		0.941657	0.300675	0.262594	0.224292	0.430896	0.265383		1.10391	0.266187	0.609298	0.15473	0.588947	0.182271		0.67113	0.26943	0.271896	0.17451	0.387201	0.248372		0.529041	0.257012	-0.236568	0.151332	-0.646433	0.219443
240	1180-1189	IDRLNEVAKN	9	2.11649	0.2117	2.55734	0.071922	2.93386	0.044182		0.208454	0.245133	0.373255	0.219327	0.40983	0.122211		0.119522	0.245023	0.259887	0.158239	-0.173294	0.049329		0.015112	0.236141	-0.048646	0.094991	-0.039	0.214553		-0.260617	0.272885	-0.14015	0.073863	-0.348054	0.076085
241	1195-1219	IDLQELGKYEQGSGYIPEAPRDGQA	22	8.29938	0.302463	9.95721	0.363774	10.304	0.234506		0.391174	0.450557	-0.044721	0.527651	-0.299978	0.339347		0.917137	0.549463	0.266073	0.363802	-0.136886	0.34372		0.295275	0.314616	0.136266	0.363776	-0.375506	0.413836		0.84928	0.45746	0.499667	0.489786	-0.108104	0.459062
242	1198-1219	QELGKYEQGSGYIPEAPRDGQA	19	5.55416	0.112351	7.39122	0.324036	7.65836	0.229308		0.227921	0.113118	-0.237485	0.406402	-0.427771	0.243058		0.683622	0.327052	0.399165	0.347238	-0.389837	0.229316		0.648391	0.229348	0.04591	0.341678	-0.300778	0.321396		0.605705	0.234431	0.096266	0.367609	-0.242403	0.256371
243	1220-1227	YVRKDGEW	7	0.831701	0.068481	1.01223	0.043083	0.995957	0.055036		0.329144	0.092403	0.123677	0.07408	0.139369	0.067704		0.050546	0.080875	0.099811	0.057419	0.139411	0.070228		0.134535	0.07107	0.096589	0.058835	0.096325	0.057048		0.059237	0.09267	0.051761	0.068626	0.05058	0.068415
244	1220-1229	YVRKDGEWVL	9	1.20444	0.060114	1.40354	0.047806	1.4525	0.022472		0.133688	0.068624	0.022454	0.052435	-0.006096	0.047739		0.091412	0.063846	0.075603	0.061366	-0.02537	0.091816		0.129219	0.061428	-0.00153	0.062003	-0.0134	0.035805		0.201019	0.07245	0.043233	0.076002	-0.016343	0.06361
245	1220-1235	YVRKDGEWVLLSTFLG	15	1.12701	0.148176	2.62358	0.239941	4.5486	0.34328		0.235364	0.255615	0.162546	0.370665	0.58748	0.467325		0.524919	0.171635	-0.033714	0.239944	0.250221	0.343282		0.821984	0.151674	0.875222	0.24391	0.279449	0.488337		0.406052	0.177789	0.557092	0.240921	0.246872	0.405049
246	1228-1234	VLLSTFL	6	2.33445	0.147598	2.56155	0.131388	2.89761	0.03187		0.079655	0.166217	-0.044971	0.136161	-0.079444	0.036748		0.099718	0.162889	0.094881	0.143714	-0.075891	0.033837		0.153337	0.149169	-0.002647	0.135803	-0.093467	0.040376		0.11331	0.148641	0.033787	0.138367	0.021813	0.122695
247	1230-1238	LSTFLGRSL	8	3.24918	0.168021	3.42488	0.217968	3.57825	0.201078		0.176282	0.255609	-0.011901	0.243731	-0.152194	0.214902		0.076529	0.251966	0.161107	0.257118	-0.174892	0.221964		0.19242	0.211236	0.029331	0.23053	-0.198594	0.264823		0.155132	0.248785	0.04569	0.289784	-0.047206	0.340847
248	1230-1239	LSTFLGRSLE	9	3.2191	0.371039	3.40064	0.240665	3.57765	0.213662		-0.014235	0.458539	-0.413302	0.247604	-0.253888	0.239911		-0.279092	0.394326	0.140381	0.281404	-0.247028	0.256156		-0.195866	0.394393	0.10994	0.295103	-0.138417	0.293734		0.319423	0.379998	0.217328	0.259083	0.065512	0.239972
249	1230-1241	LSTFLGRSLEVL	11	2.70333	0.22193	3.08726	0.023732	3.4626	0.14262		1.31839	0.446825	1.0895	0.124662	0.684491	0.213236		1.48059	0.25225	1.22939	0.165119	0.745833	0.222355		1.52063	0.309783	1.33846	0.18833	0.708751	0.230819		1.41052	0.275139	1.06458	0.344642	0.542344	0.387415
250	1231-1238	STFLGRSL	7	2.54617	0.128108	3.29248	0.0562	3.40826	0.104501		0.698057	0.172151	-0.014461	0.15198	-0.08492	0.126864		0.049466	0.136134	0.078171	0.059449	-0.278948	0.145857		0.696298	0.159665	0.070477	0.168294	0.004256	0.117433		0.743085	0.152828	-0.069757	0.059449	-0.402803	0.106283
251	1233-1241	FLGRSLEVL	8	2.02179	0.217641	2.41352	0.220024	2.55411	0.247441		0.503114	0.268409	0.106534	0.242922	0.060571	0.254684		0.504608	0.272692	0.32953	0.250744	0.042263	0.276627		0.588256	0.252014	0.267467	0.230589	0.054788	0.263805		0.510748	0.24774	0.217079	0.279288	0.088488	0.307891
252	1234-1241	LGRSLEVL	7	2.02158	0.161686	2.18251	0.086835	2.26388	0.047946		0.281957	0.19359	0.135452	0.124355	0.054826	0.077919		0.248893	0.181822	0.205708	0.10266	0.040838	0.084355		0.276636	0.178321	0.16529	0.098756	0.026979	0.074592		0.205218	0.195981	0.099958	0.141891	0.067768	0.135436
253	1257-1263	WSHPQFE	5	0.728974	0.081731	0.724315	0.074785	0.744803	0.054649		-0.055082	0.101345	-0.044354	0.097588	-0.087067	0.069596		-0.023092	0.09874	0.081157	0.100217	-0.028568	0.064751		-0.014372	0.08616	0.022086	0.075435	-0.070122	0.067381		-0.033317	0.101244	0.002245	0.089267	0.006451	0.068509
